# Supplementary material for: Physical activity-related injuries among university students: a multicentre cross-sectional study in China
Source: PubMed Central journal article supplement — BMJ Open. 2018 Sep 21;8(9):e021845. doi: 10.1136/bmjopen-2018-021845 (PMC6157521; doi:10.1136/bmjopen-2018-021845), 2018-09-21
Supplement: bmjopen-2018-021845.draft_revisions.pdf [file bmjopen-2018-021845.draft_revisions.pdf]

# BMJ Open

BMJ Open is committed to open peer review. As part of this commitment we make the peer review history of every article we publish publicly available.

When an article is published we post the peer reviewers' comments and the authors' responses online. We also post the versions of the paper that were used during peer review. These are the versions that the peer review comments apply to.

The versions of the paper that follow are the versions that were submitted during the peer review process. They are not the versions of record or the final published versions. They should not be cited or distributed as the published version of this manuscript.

BMJ Open is an open access journal and the full, final, typeset and author-corrected version of record of the manuscript is available on our site with no access controls, subscription charges or pay-per-view fees (<http://bmjopen.bmj.com>).

If you have any questions on BMJ Open's open peer review process please email [info.bmjopen@bmj.com](mailto:info.bmjopen@bmj.com)

# BMJ Open

## Being physically active increases risk for injury among university students: a multi-center cross-sectional study in China

|                               |                                                                                                                                                                                                                                                                                                                                                                                                                                                                                                                                                                                                                                  |
|-------------------------------|----------------------------------------------------------------------------------------------------------------------------------------------------------------------------------------------------------------------------------------------------------------------------------------------------------------------------------------------------------------------------------------------------------------------------------------------------------------------------------------------------------------------------------------------------------------------------------------------------------------------------------|
| Journal:                      | <i>BMJ Open</i>                                                                                                                                                                                                                                                                                                                                                                                                                                                                                                                                                                                                                  |
| Manuscript ID                 | bmjopen-2018-021845                                                                                                                                                                                                                                                                                                                                                                                                                                                                                                                                                                                                              |
| Article Type:                 | Research                                                                                                                                                                                                                                                                                                                                                                                                                                                                                                                                                                                                                         |
| Date Submitted by the Author: | 23-Jan-2018                                                                                                                                                                                                                                                                                                                                                                                                                                                                                                                                                                                                                      |
| Complete List of Authors:     | Gao, Gemma Yang; Hong Kong Baptist University, Department of Physical Education<br>Cai, Weicong; Shantou University Medical College, Injury Preventive Research Center<br>Gao, Lijie; Shandong University School of Public Health, Department of Epidemiology<br>Wang, Jingjing; China Institute of Sport Science, Mass Sports Research Center<br>Liang, Jiehui; Shantou University Medical College, Injury Preventive Research Center<br>Kwok, Heather ; Hong Kong Baptist University, Department of Physical Education<br>Jia, Cun-Xian; Shandong University School of Public Health, Department of Epidemiology<br>Li, Liping |
| Keywords:                     | EPIDEMIOLOGY, PHYSICAL ACTIVITY, SPORTS INJURY, RISK FACTORS, YOUTH                                                                                                                                                                                                                                                                                                                                                                                                                                                                                                                                                              |
|                               |                                                                                                                                                                                                                                                                                                                                                                                                                                                                                                                                                                                                                                  |

SCHOLARONE™  
Manuscripts

1  
2  
3 **Title: Being physically active increases risk for injury among university students:**  
4 **a multi-center cross-sectional study in China**  
5  
6  
7

8 Running title: Physical activity-related injury among youth  
9  
10

11 Yang Gao<sup>2</sup>, Weicong Cai<sup>1</sup>, Lijie Gao<sup>3</sup>, Jingjing Wang<sup>4</sup>, Jiehui Liang<sup>1</sup>, Heather Kwok<sup>2</sup>,  
12 Cunxian Jia<sup>3</sup>, Liping Li<sup>1\*</sup>  
13  
14

15 <sup>1</sup> Injury Preventive Research Center, Shantou University Medical College, Shantou,  
16 China  
17

18 <sup>2</sup> Department of Physical Education, Hong Kong Baptist University, Hong Kong,  
19 China  
20

21 <sup>3</sup> Department of Epidemiology, Shandong University School of Public Health,  
22 Shandong, China  
23  
24

25 <sup>4</sup> Mass Sports Research Center, China Institute of Sport Science, Beijing, China  
26

27 \* Corresponding authors. Liping Li, e-mail: [lppli@stu.edu.cn](mailto:lppli@stu.edu.cn)

28 Injury Preventive Research Center, Shantou University Medical College, No.22  
29 Xinling Road, Shantou 515041, Guangdong, China.  
30

31 Tel: 0086-0754-88900467; Fax: 0086-0754-88550372  
32  
33  
34  
35  
36  
37  
38  
39  
40  
41  
42  
43  
44  
45  
46  
47  
48  
49  
50  
51  
52  
53  
54  
55  
56  
57  
58  
59  
60

## Abstract

**Objectives:** This study aimed to investigate the epidemiologic characteristics and identify risk factors of physical activity-related injury (PARI) among Chinese university students via a multi-center mixed survey.

**Design:** Cross-sectional study.

**Participants:** A total of 4758 undergraduates graded 1-3 in nine universities in three Chinese cities were invited and completed the self-administered online questionnaires via the method of cluster random sampling during March-April, 2017. Students in Years 4 were excluded as they are in the transition period to work and their university lives are significantly different from the others. In addition, those with study major in physical education (PE) were further excluded from data analysis, as they differ significantly from others in terms of physical activity (PA)/sports related factors.

**Main outcome measures:** Physical activity-related injury in the past 12 months.

**Results:** Of 4758 participants, 1081 sustained PARI in the past 12 months, with an overall PARI incidence rate of 22.7% (27.3% [367/1343] in males and 20.9% [714/3415] in females). Around one quarter of the injured (26.4%) experienced PARI at least three episodes. More than half of the injured experienced PA absenteeism and sought medical care. All PA indicators were significantly and positively associated with PARI, with frequency of leisure-time VPA being the strongest (adjusted OR: 1.079, 95% CI: 1.018-1.144). Moreover, males, Shantou students, Year 1 students, sports

1  
2  
3 team members, and those with insufficient sleep time were also at higher risks for  
4  
5  
6 PARI experience.  
7

8  
9 **Conclusions:** PARI was prevalent among university students in China. Frequency of  
10  
11 leisure-time VPA was the strongest risk factor among all PA indicators. The above  
12  
13 data can inform future programs for the injury-intervention in university students.  
14  
15 Safety issues should also be involved and emphasized when promoting PA among the  
16  
17 public to reduce PARI occurrence.  
18  
19

## 20 21 22 **Article summary**

### 23 24 25 **Strengths and limitations of this study**

- 26  
27
- 28 1) It is the first of this kind of publications to explore the epidemic and risk factors  
29 of PARI among Chinese general university students.  
30  
31
  - 32 2) The nature of cross-sectional study limits causal and temporal inference.  
33  
34
  - 35 3) All information was self-reported, which have resulted in recall bias and report  
36 bias and threatened our results.  
37  
38  
39
  - 40 4) We could not examine their associations with PARI as the GPAQ does not capture  
41 the specific activities the participants undertook.  
42  
43  
44  
45  
46

### 47 48 **Funding statement**

49  
50 This work was supported by the National Natural Science Foundation of China  
51  
52 grant number 31640038.  
53  
54

## Competing interests

The authors declare that they have no competing interests.

## Introduction

Physical, social and psychological benefits of engaging in regular physical activity (PA) have been well documented, including increased cardiorespiratory and muscular fitness and bone density, and reduced risks for non-communicable diseases.<sup>1-3</sup> Insufficient PA has been recognized as one of the top three risk behaviors in development of morbidity and mortality associated with cardiovascular diseases and other major chronic diseases, such as diabetes and obesity.<sup>4</sup> In order to achieve and maintain individual health at an optimal level, the World Health Organization (WHO) has recommended that adults (18-64 years old) should undertake at least 150 minutes of moderate-intensity PA (MPA), or at least 75 minutes of vigorous-intensity PA (VPA), or an equivalent combination of moderate- and vigorous-intensity PA (MVPA) every week.<sup>4</sup> With these recommendations, almost all countries and regions in the world have been engaged in the current global campaign to promote PA.

Although the promotion of PA is a public health priority, being physically active might increase the risk for injury.<sup>5-7</sup> Physical activity-related injury (PARI), also known as sports and recreational activity-related injury, was defined as any injury resulting from participation in PE class, sports activities or leisure time PA, such as sprain, strain, fracture, contusion, and et al.<sup>8</sup> In fact, PARI contributes to all non-fatal injury most, which ranks the top one health threat to relatively healthy adolescents

1  
2  
3 and young adults in many countries.<sup>49</sup> In a long term, it can also increase risks for  
4  
5 future injuries, osteoarthritis and other health problems in later life.<sup>10</sup> In addition,  
6  
7 PARI may be a barrier to adopting more active lifestyle, which may further hinder  
8  
9 people from achieving optimal health.<sup>11 12</sup>  
10  
11  
12  
13

14 We have been conducting a series of studies on PARI. Results from previous  
15  
16 studies revealed that about 25.1%-32.1% of primary and secondary students in two  
17  
18 Chinese cities had suffered from PARI in the past 12 months, suggesting that PARI is  
19  
20 prevalent among children and adolescents. In China, students in universities might be  
21  
22 more active than those in secondary schools, as they have been released from heavy  
23  
24 academic burdens and pressure for university admission. They become independent  
25  
26 from their parents and therefore are more likely to engage in relatively risky  
27  
28 activities which their parents may not allow them to do before.<sup>13</sup> Thus, university  
29  
30 students might be more vulnerable to PARI. Though there is plenty of evidence about  
31  
32 PARI among collegiate athletes, it may not be suitable to general students given  
33  
34 significant differences in risk factors between the two, such as sports skills, training  
35  
36 intensity, competition level, and cardiorespiratory and muscle fitness level.<sup>14 15</sup>  
37  
38 However, few studies have been addressed the general university students.<sup>13 16</sup> We  
39  
40 therefore conducted a multi-center mixed study among a sample of general  
41  
42 university students in China to obtain a better understanding of the PARI epidemic.  
43  
44 The work was supported by the National Natural Science Foundation of China (Ref.  
45  
46 No.: 31640038). This paper presents findings from its baseline survey, aiming to  
47  
48  
49  
50  
51  
52  
53  
54  
55  
56  
57  
58  
59  
60

investigate the epidemiologic characteristics and identify risk factors of PARI among Chinese university students.

## Methods

### Study Participants

The study was conducted in nine universities (eight comprehensive universities and one normal university (where students are trained to become teachers in kindergartens and primary and secondary schools)) in three Chinese cities, namely Jinan, Shantou, and Hong Kong. Each city represents northern, southern, and special regions of China respectively. Students in Years 1-3 were invited and voluntarily participated into the study during March and April, 2017. Seniors (students in Years 4) were excluded as they are in the transition period to work and their university lives are significantly different from the others. In addition, those with study major in physical education (PE) were further excluded from data analysis, as they differ significantly from others in terms of PA/sports related factors.

### Data collection

The Qualtrics software (Qualtrics, Provo, UT) was used as the online platform of the baseline questionnaire survey. Participants were enrolled in classes, or from dormitories. The online questionnaire was self-administered, consisting of demographics, PA habits, sedentary behaviors, sleep duration, and PARI experiences in the past 12 months. The demographic variables included university, study major,



1  
2  
3 study year, gender, age, residence type (dormitory, home, or others), any diagnosed  
4 chronic disease/symptom, and sports team membership.  
5  
6

7  
8  
9 Participants' PA levels in a typical week in the past 12 months were asked using  
10 the Global Physical Activity Questionnaire (GPAQ) Chinese version.<sup>17</sup> It is one of the  
11 most commonly used PA questionnaires and possesses sound reliability and validity  
12 (spearman's  $\rho=0.81$ , kappa=0.65).<sup>18 19</sup> The GPAQ collects frequency (days/week)  
13 and duration (averaged cumulative minutes/day) of VPA and MPA in three domains,  
14 including domestic/work/study, transportation (MPA only), and sports and  
15 leisure-time. PA volume (cumulative minutes/week) was then calculated by duration  
16 multiplied by frequency for each category of PA (VPA, MPA, and MVPA), in each  
17 domain and overall, generating a total of 20 PA-related variables. Given the GPAQ  
18 does not provide information on specific activities participated, all students were  
19 further asked if they had any sports or recreational activities they liked and  
20 participated often in the past 12 months (favorite activities). Those with a positive  
21 answer were further asked to provide the names of the activities (no more than three).  
22  
23  
24  
25  
26  
27  
28  
29  
30  
31  
32  
33  
34  
35  
36  
37  
38  
39  
40

41 In terms of sedentary behaviors and sleep, duration (hours/day) was asked on a  
42 typical weekday and a typical weekend respectively. Averaged daily duration in a  
43 week was then calculated and used to group the students into five categories.  
44  
45  
46  
47  
48

49 In this study, a countable PARI must meet at least one of the following three  
50 consequences: (1) have to immediately stop the PA and/or cannot participate in the  
51  
52  
53  
54

1  
2  
3 next planned PA; and/or (2) be absent from class the next day; and/or (3) need  
4  
5  
6 medical attention (including on-spot first aids, but excluding those using bandages  
7  
8 only).<sup>8</sup> If suffering from such a PARI in the past 12 months, the participants were then  
9  
10  
11 asked to report the number of PARI in each consequence category.  
12

### 13 14 **Procedures**

15  
16  
17 This study was strictly conducted in accordance with the Declaration of Helsinki.  
18  
19 Prior to approaching potential students, approval was obtained from Shantou  
20  
21 University Medical College ethics committee, Shandong University ethics committee,  
22  
23 and Hong Kong Baptist University ethics committee. Explanatory statement and  
24  
25 consent forms were distributed to all participants, and the questionnaires were  
26  
27 subsequently given to the consenting students in the nominated classes or dormitories.  
28  
29 The purpose and meaning of our study was verbally explained to the students prior to  
30  
31 their completion of the questionnaires, and our trained personnel would answer any  
32  
33 questions of clarification as participants arose during the session.  
34  
35  
36  
37  
38

### 39 **Statistical analysis**

40  
41  
42 Statistical analyses were performed using SPSS version 19.0 (SPSS Inc. Chicago,  
43  
44 IL, USA). Continuous and categorical variables were described using median  
45  
46 (inter-quartile, IQR) or mean (standard deviation, SD) and number (percentage), and  
47  
48 tested for between-group differences using nonparametric tests or *t*-tests and Pearson  
49  
50 chi-square tests, respectively. Both univariate and multivariate logistic regression  
51  
52  
53  
54

1  
2  
3 were fitted to estimate the risk of each study variable for PARI, where crude and  
4  
5 adjusted odds ratios (ORs) and their 95% confidence intervals (95% CIs) were  
6  
7 derived respectively. Three steps were undertaken in the multivariate analyses: Step 1,  
8  
9 in a multivariate model, all socio-demographic variables were selected in both  
10  
11 forward and backward manners (likelihood ratio), with selection criteria of  $\alpha_{in}=0.10$   
12  
13 and  $\alpha_{out}=0.15$ . Adjusted ORs and 95% CIs of variables kept in the final model  
14  
15 (significant variables) were then derived from, including city, study year, gender,  
16  
17 university/other sports team member, and any chronic disease/symptom. For variables  
18  
19 outside of the final model (insignificant variables, including age and residence type),  
20  
21 their adjusted ORs and 95% CIs were obtained after controlling for the significant  
22  
23 variables; Step 2, the risk of each life-style variable (including PA habits, sedentary  
24  
25 behaviors, and sleep duration) was assessed after controlling for the significant  
26  
27 socio-demographic variables in the first step; Step 3, a hierarchical model was  
28  
29 performed to consider all study variables together, with socio-demographic variables  
30  
31 being selected in the first block and life-style variables in the second. A two-sided  
32  
33 *P*-value less than 0.05 was considered statistically significant for all tests.  
34  
35  
36  
37  
38  
39  
40  
41  
42

## 43 Results

44  
45  
46 A total of 4758 eligible students in Years 1-3 (aged  $20.00 \pm 1.382$  years)  
47  
48 completed the online survey. Table 1 presents the distribution of the  
49  
50 social-demographic characteristics and their risk estimations for PARI. More students  
51  
52 were female (71.8%), living in dormitory (61.1%), and studying in Shantou (44.6%).  
53  
54  
55

Few students were sports team members or living with any chronic condition (3.7%-10.4%). About 1081 students (22.7%) suffered from at least one PARI in the past 12 months, with significantly higher risks being found in both types of sports team members and those living with chronic conditions (adjusted ORs: 1.559-3.118). In addition, students in Jinan and Hong Kong, females, and those in Years 2 and 3 were less likely to experience PARI (adjusted ORs: 0.783-0.254). Age and residence type were not significantly associated with PARI.

**Table 1 Risks of socio-demographic characteristics for physical activity-related injury (PARI) among university students in China**

| Characteristics                      | All<br>(N=4758)<br>n (%) | Non-PARI<br>(N=3677)<br>n (%) | PARI<br>(N=1081)<br>n (%) | Adjusted<br>OR | 95% CI      |
|--------------------------------------|--------------------------|-------------------------------|---------------------------|----------------|-------------|
| <b>City</b>                          |                          |                               |                           |                |             |
| Shantou                              | 2123 (44.6)              | 1403 (66.1)                   | 720 (33.9)                | 1 (ref.)       |             |
| Jinan                                | 1267 (26.6)              | 1111 (87.7)                   | 156 (12.3)                | 0.254***       | 0.209~0.310 |
| Hong Kong                            | 1368 (28.8)              | 1163 (85.0)                   | 205 (15.0)                | 0.276***       | 0.225~0.338 |
| <b>Study year</b>                    |                          |                               |                           |                |             |
| Year 1                               | 1496 (31.4)              | 1125 (75.2)                   | 371 (24.8)                | 1 (ref.)       |             |
| Year 2                               | 1462 (30.7)              | 1121 (76.7)                   | 341 (23.3)                | 0.825*         | 0.681~0.999 |
| Year 3                               | 1800 (37.8)              | 1431 (79.5)                   | 369 (20.5)                | 0.716**        | 0.568~0.832 |
| <b>Gender</b>                        |                          |                               |                           |                |             |
| Male                                 | 1343 (28.2)              | 976 (72.7)                    | 367 (27.3)                | 1 (ref.)       |             |
| Female                               | 3415 (71.8)              | 2701 (79.1)                   | 714 (20.9)                | 0.712***       | 0.610~0.832 |
| <b>Residence type</b>                |                          |                               |                           |                |             |
| Dormitory                            | 2908 (61.1)              | 2210 (76.0)                   | 698 (24.0)                | 1 (ref.)       |             |
| Home                                 | 1742 (36.6)              | 1377 (79.0)                   | 365 (21.0)                | 1.016          | 0.861~1.198 |
| Others                               | 108 (2.3)                | 90 (83.3)                     | 18 (16.7)                 | 0.820          | 0.469~1.434 |
| <b>University sports team member</b> |                          |                               |                           |                |             |
| No                                   | 4262 (89.6)              | 3380 (79.3)                   | 882 (20.7)                | 1 (ref.)       |             |
| Yes                                  | 496 (10.4)               | 297 (59.9)                    | 199 (40.1)                | 3.136***       | 2.528~3.889 |
| <b>Other sports team member</b>      |                          |                               |                           |                |             |
| No                                   | 4472 (94.0)              | 3512 (78.5)                   | 960 (21.5)                | 1 (ref.)       |             |
| Yes                                  | 286 (6.0)                | 165 (57.7)                    | 121 (42.3)                | 2.182***       | 1.678~2.838 |
| <b>Any chronic</b>                   |                          |                               |                           |                |             |

|                 |                  |                  |                  |          |             |  |
|-----------------|------------------|------------------|------------------|----------|-------------|--|
| disease/symptom |                  |                  |                  |          |             |  |
| No              | 4583 (96.3)      | 3563 (77.7)      | 1020 (22.3)      | 1 (ref.) |             |  |
| Yes             | 175 (3.7)        | 114 (65.1)       | 61 (34.9)        | 1.561*   | 1.111~2.195 |  |
|                 | <i>mean ± SD</i> | <i>mean ± SD</i> | <i>mean ± SD</i> |          |             |  |
| Age (years)     | 20.00±1.382      | 20.01±1.426      | 19.98±1.386      | 0.983    | 0.934~1.146 |  |

\*:  $P < 0.05$ ; \*\*:  $P < 0.01$ ; \*\*\*:  $P < 0.001$ .

Adjusted ORs and 95% CIs of significant variables were calculated after controlling for each other, including city, study year, gender, university/other sports team member, and any chronic disease/symptom. Adjusted ORs and 95% CIs of insignificant variables (age and residence type) were obtained after controlling for the significant variables.

Table 2 shows the distribution of life-style variables and their risk assessments for PARI. The majority of the students engaged in leisure-time PA (87.5%) and transport-related PA (82.1%). Medians and interquartile ranges (IQRs) for total volumes of VPA, MPA and MVPA (min/week) were 0 (0, 100), 60.00 (0, 150) and 255.00 (120, 490) respectively. Overall, 70.2% of university students were physically active according to the WHO's recommended PA for adults.<sup>4</sup> All PA indicators were positively and significantly related with PARI (adjusted ORs: 1.001-1.171), with the risk of leisure-time VPA being highest. About 26.4% of students slept less than 7 hours/day. Insufficient sleep duration elevated the risk for PARI, with the highest being found in the group of less than 6 hours/day (adjusted OR: 1.428; 95% CI: 1.032~1.977).

**Table 2 Risks of life-style variables for physical activity-related injury (PARI) among university students in China**

| Characteristics            | All<br>(N=4758)<br>median (IQR) | Non-PARI<br>(N=3677)<br>median (IQR) | PARI<br>(N=1081)<br>median (IQR) | Adjusted<br>OR | 95% CI      |
|----------------------------|---------------------------------|--------------------------------------|----------------------------------|----------------|-------------|
| <b>Domestic/work/study</b> |                                 |                                      |                                  |                |             |
| <u>VPA</u> <sup>1</sup>    |                                 |                                      |                                  |                |             |
| Frequency, d/week          | 0 (0, 1)                        | 0 (0, 1)                             | 0 (0, 2)                         | 1.168***       | 1.111~1.228 |
| Duration, min/d            | 0 (0, 20)                       | 0 (0, 15)                            | 0 (0, 30)                        | 1.008***       | 1.006~1.010 |
| Volume, min/week           | 0 (0, 30)                       | 0 (0, 20)                            | 0 (0, 60)                        | 1.002***       | 1.001~1.002 |

|                                |                |                |                |                      |             |
|--------------------------------|----------------|----------------|----------------|----------------------|-------------|
| <b>MPA<sup>2</sup></b>         |                |                |                |                      |             |
| Frequency, d/week              | 1 (0, 2)       | 1 (0, 2)       | 1 (0, 3)       | 1.124 <sup>***</sup> | 1.082~1.167 |
| Duration, min/d                | 10 (0, 30)     | 10 (0, 30)     | 20 (0, 30)     | 1.005 <sup>***</sup> | 1.004~1.007 |
| Volume, min/week               | 20 (0, 60)     | 10 (0, 60)     | 40 (0, 100)    | 1.001 <sup>***</sup> | 1.001~1.002 |
| <b>MVPA<sup>3</sup></b>        |                |                |                |                      |             |
| Volume, min/week               | 40 (0, 120)    | 30 (0, 105)    | 60 (0, 180)    | 1.001 <sup>***</sup> | 1.001~1.002 |
| <b>Transportation</b>          |                |                |                |                      |             |
| <b>MPA<sup>2</sup></b>         |                |                |                |                      |             |
| Frequency, d/week              | 5 (1, 7)       | 5 (1, 7)       | 5 (2, 7)       | 1.030 <sup>*</sup>   | 1.003~1.059 |
| Duration, min/d                | 30 (10, 40)    | 30 (10, 40)    | 30 (15, 50)    | 1.002 <sup>**</sup>  | 1.001~1.004 |
| Volume, min/week               | 120 (30, 210)  | 105 (30, 210)  | 140 (50, 210)  | 1.002 <sup>***</sup> | 1.001~1.003 |
| <b>Sports and leisure-time</b> |                |                |                |                      |             |
| <b>VPA<sup>1</sup></b>         |                |                |                |                      |             |
| Frequency, d/week              | 0 (0, 1)       | 0 (0, 1)       | 0 (0, 2)       | 1.171 <sup>***</sup> | 1.116~1.229 |
| Duration, min/d                | 0 (0, 30)      | 0 (0, 30)      | 0 (0, 47.5)    | 1.006 <sup>***</sup> | 1.004~1.008 |
| Volume, min/week               | 0 (0, 60)      | 0 (0, 38)      | 0 (0, 90)      | 1.002 <sup>***</sup> | 1.001~1.003 |
| <b>MPA<sup>2</sup></b>         |                |                |                |                      |             |
| Frequency, d/week              | 1 (0, 2)       | 0 (0, 2)       | 1 (0, 3)       | 1.125 <sup>***</sup> | 1.082~1.169 |
| Duration, min/d                | 10 (0, 30)     | 0 (0, 30)      | 20 (0, 40)     | 1.006 <sup>***</sup> | 1.004~1.008 |
| Volume, min/week               | 15 (0, 80)     | 0 (0, 75)      | 40 (0, 90)     | 1.002 <sup>***</sup> | 1.001~1.002 |
| <b>MVPA<sup>3</sup></b>        |                |                |                |                      |             |
| Volume, min/week               | 45 (0, 130.5)  | 30 (0, 120)    | 80 (0, 210)    | 1.001 <sup>***</sup> | 1.001~1.002 |
| <b>Total VPA<sup>1</sup></b>   |                |                |                |                      |             |
| Volume, min/week               | 0 (0, 100)     | 0 (0, 80)      | 40 (0, 180)    | 1.001 <sup>***</sup> | 1.001~1.002 |
| <b>Total MPA<sup>2</sup></b>   |                |                |                |                      |             |
| Volume, min/week               | 60 (0, 150)    | 60 (0, 140)    | 100 (10, 200)  | 1.001 <sup>***</sup> | 1.001~1.001 |
| <b>Total MVPA<sup>3</sup></b>  |                |                |                |                      |             |
| Volume, min/week               | 255 (120, 490) | 235 (105, 450) | 340 (180, 630) | 1.001 <sup>***</sup> | 1.000~1.001 |
|                                | <i>n (%)</i>   | <i>n (%)</i>   | <i>n (%)</i>   |                      |             |
| <b>Sedentary behaviors</b>     |                |                |                |                      |             |
| <4.00 h/d                      | 590 (12.4)     | 459 (77.8)     | 131 (22.2)     | 1 (ref.)             |             |
| 4.00-5.99 h/d                  | 869 (18.3)     | 664 (76.4)     | 205 (23.6)     | 1.119                | 0.859~1.459 |
| 6.00-8.99 h/d                  | 1453 (30.5)    | 1119 (77.0)    | 334 (23.0)     | 0.983                | 0.769~1.258 |
| 9.00-11.99 h/d                 | 978 (20.6)     | 752 (76.9)     | 226 (23.1)     | 0.940                | 0.721~1.225 |
| ≥12.00 h/d                     | 868 (18.2)     | 683 (78.7)     | 185 (21.3)     | 0.795                | 0.604~1.045 |
| <b>Sleep duration</b>          |                |                |                |                      |             |
| <6.00 h/d                      | 287(6.0)       | 223 (77.7)     | 64 (22.7)      | 1.428 <sup>*</sup>   | 1.032~1.977 |
| 6.00-6.99 h/d                  | 969 (20.4)     | 708 (73.0)     | 261 (27.0)     | 1.425 <sup>***</sup> | 1.175~1.729 |
| 7.00-7.99 h/d                  | 1882 (39.6)    | 1493 (79.3)    | 389 (20.7)     | 1 (ref.)             |             |
| 8.00-8.99 h/d                  | 1186 (24.9)    | 916 (77.2)     | 270 (22.8)     | 1.131                | 0.939~1.361 |
| ≥ 9.00 h/d                     | 434 (9.1)      | 337 (77.6)     | 97 (22.4)      | 1.020                | 0.782~1.331 |

#:  $P < 0.10$ ; \*:  $P < 0.05$ ; \*\*:  $P < 0.01$ ; \*\*\*:  $P < 0.001$ .

<sup>1</sup>: VPA, vigorous-intensity physical activity.

<sup>2</sup>: MPA, moderate-intensity physical activity.

<sup>3</sup>: MVPA, moderate- and vigorous-intensity physical activity.

Adjusted ORs and 95% CIs of each life-style variable were calculated after controlling for the significant socio-demographic variables in Table 1, including city, study year, gender, university/other sports team member, and any chronic disease/symptom.

We finally performed a hierarchical analysis and Table 3 presents results of its final model. Risk estimations of socio-demographic variables in Block 1 (including city, gender, study year, and chronic disease/symptom) did not change much before and after controlling for life-style variables, whilst those of the two variables of sports team member reduced largely after adjustment for life-style variables. In addition, adjusted ORs of all life-style variables (in Block 2) decreased after controlling for each other.

**Table 3 Final model of hierarchical logistic regression to estimate risks of both socio-demographic and life-style variables for PARI among university students in China**

| Characteristics               | <i>P</i> -value | Adjusted OR | 95% CI      |
|-------------------------------|-----------------|-------------|-------------|
| <b>Block 1</b>                |                 |             |             |
| City                          |                 |             |             |
| Shantou                       |                 | 1 (ref.)    |             |
| Jinan                         | 0.000           | 0.236       | 0.194~0.288 |
| Hong Kong                     | 0.000           | 0.222       | 0.181~0.273 |
| Study year                    |                 |             |             |
| Year 1                        |                 | 1 (ref.)    |             |
| Year 2                        | 0.054           | 0.836       | 0.697~1.003 |
| Year 3                        | 0.041           | 0.830       | 0.695~0.992 |
| Gender                        |                 |             |             |
| Male                          |                 | 1 (ref.)    |             |
| Female                        | 0.033           | 0.838       | 0.712~0.986 |
| University sports team member |                 |             |             |
| No                            |                 | 1 (ref.)    |             |
| Yes                           | 0.000           | 2.360       | 1.881~2.961 |
| Other sports team member      |                 |             |             |
| No                            |                 | 1 (ref.)    |             |
| Yes                           | 0.000           | 1.717       | 1.309~2.253 |
| Any chronic disease/symptom   |                 |             |             |
| No                            |                 | 1 (ref.)    |             |

|                                                    |       |          |             |
|----------------------------------------------------|-------|----------|-------------|
| Yes                                                | 0.013 | 1.548    | 1.096~2.187 |
| <b>Block 2</b>                                     |       |          |             |
| Leisure-time VPA <sup>1</sup> , frequency (d/week) | 0.010 | 1.079    | 1.018~1.144 |
| Leisure-time VPA <sup>1</sup> , duration (min/d)   | 0.000 | 1.006    | 1.003~1.008 |
| Leisure-time MPA <sup>2</sup> , frequency (d/week) | 0.000 | 1.004    | 1.002~1.006 |
| Sleep duration                                     |       |          |             |
| <6.00 h/d                                          | 0.045 | 1.333    | 1.006~1.766 |
| 6.00-6.99 h/d                                      | 0.014 | 1.262    | 1.048~1.519 |
| 7.00-7.99 h/d                                      |       | 1 (ref.) |             |
| 8.00-8.99 h/d                                      | 0.314 | 1.111    | 0.905~1.365 |
| ≥ 9.00 h/d                                         | 0.692 | 1.061    | 0.791~1.425 |

<sup>1</sup>: VPA, vigorous-intensity physical activity.

<sup>2</sup>: MPA, moderate-intensity physical activity.

In terms of favorite activities, three fifths of the students (59.7%) reported at least one specific activity that they liked and participated often in the past 12 months. Common favorite activities reported included running (36.0%), badminton (27.2%), basketball (25.2%), cycling (24.3%), swimming (18.1%), table tennis (15.1%), soccer (14.3%), dance (13.8%) and volleyball (10.1%). Gender difference existed, with male students favoring basketball (54.1%) and football (32.2%), whilst females preferring badminton (26.9%) and dance (14.6%).

Table 4 summarizes the number and consequences of reported PARIs among the 1081 injured participants, before and after stratified by gender. In the past 12 months, around one quarter of the injured (26.4%) experienced PARIs three times or more. More than half reported that they immediately stopped the activity or could not participate in the next activity (58.5%), or sought medical care (55.0%) after injured. Males were more likely than females to experience multiple PARI episodes ( $\geq 3$  episodes) and result in negative influences on PA participation.



**Table 4 Number and consequences of physical activity-related injury (PARI) among injured university students in China (N=1081)**

| Characteristics                                      | All<br>(N=1081)<br>n (%) | Male<br>(N=367)<br>n (%) | Female<br>(N=714)<br>n (%) | $\chi^2$ | P-value |
|------------------------------------------------------|--------------------------|--------------------------|----------------------------|----------|---------|
| Number of PARI episodes                              |                          |                          |                            | 29.837   | <0.001  |
| 1                                                    | 534 (49.4)               | 146 (39.8)               | 388 (54.3)                 |          |         |
| 2                                                    | 262 (24.2)               | 89 (24.3)                | 173 (24.2)                 |          |         |
| $\geq 3$                                             | 285 (26.4)               | 132 (36.0)               | 153 (21.4)                 |          |         |
| <b>Consequences of PARI</b>                          |                          |                          |                            |          |         |
| Stop quickly and/or can't participate in the next PA |                          |                          |                            | 4.084    | 0.044   |
| No                                                   | 449 (41.5)               | 137 (37.3)               | 312 (43.7)                 |          |         |
| Yes                                                  | 632 (58.5)               | 230 (62.7)               | 402 (56.3)                 |          |         |
| Being absent from class                              |                          |                          |                            | 2.416    | 0.120   |
| No                                                   | 778 (72.0)               | 275 (74.9)               | 503 (70.4)                 |          |         |
| Yes                                                  | 303 (28.0)               | 92 (25.1)                | 211 (29.6)                 |          |         |
| Seeking medical attention                            |                          |                          |                            | 0.267    | 0.605   |
| No                                                   | 486 (45.0)               | 169 (46.0)               | 317 (44.4)                 |          |         |
| Yes                                                  | 595 (55.0)               | 198 (54.0)               | 397 (55.6)                 |          |         |

## Discussion

A total of 4758 university students in China completed the online questionnaire survey. PARI experiences in the past 12 months were prevalent among the sample, with an overall incidence rate of 22.7%. Among the 1081 injured participants, the majority of the injured experienced a time loss from PA or required medical care due to the injuries. Multivariate analyses revealed that males, Shantou students, Year 1 students, sports team members, and those with a chronic disease/symptom were more vulnerable to PARI. PA engagements, no matter at which intensity (MPA, VPA, or MVPA), in which domain (domestic/work/study, transportation, or sports and leisure-time), or by which parameter (frequency, duration, or volume), were all

1  
2  
3 significantly and positively related with PARI. Of them, frequency of leisure-time  
4  
5  
6 VPA was the strongest PA indicator after controlling for both socio-demographic and  
7  
8  
9 life-style variables (adjusted OR: 1.079, 95% CI: 1.018-1.144,  $P=0.010$ , Table 3).  
10  
11 Moreover, insufficient sleep was common, which elevated the risk for PARI,  
12  
13 especially for a sleep duration less than 6 hours/day.  
14  
15

16  
17 As far as we knew, it is the first of this kind of publications to investigate the  
18  
19 epidemic and risk factors of PARI among general university students. In this study,  
20  
21 one out of five participants (22.7%) experienced PARI in the past 12 months,  
22  
23 suggesting that PARI is common among this population. The problem should not be  
24  
25 ignored, especially under the contemporary global campaign to promote PA for health  
26  
27 for all. Except for direct adverse effects on physical health, PARI can also result in  
28  
29 fear or even stop to be engaged into similar activities or movements, and further result  
30  
31 in reduced PA level.<sup>11 12</sup> Those consequences are against the initial purpose of PA  
32  
33 promotion for health. Though we did not investigate detailed consequences for each  
34  
35 PARI episode, our results still revealed that more than half of the injured experienced  
36  
37 PA absenteeism or required medical attention. There is an urgent call for effective  
38  
39 strategies to reduce injuries when undertaking physical activities. Otherwise, the  
40  
41 effectiveness of the global campaign would be compromised.  
42  
43  
44  
45  
46  
47

48  
49 We found that males were more vulnerable to PARI than females, is highly  
50  
51 consistent with other research.<sup>20 21</sup> Several reasons may have contributed to the  
52  
53 discrepancy: 1) males are more active than females. In our study, male students held  
54  
55

1  
2  
3 higher values than females for all PA indicators (Supplementary Table S1), supporting  
4 this possibility; 2) males are more likely to participate in competitive team sports,  
5 such as basketball and soccer. Most of these sports involve a high rate of contact,  
6 jumping, sprinting and/or pivoting, which are often involved in the mechanism of  
7 injury in sports. The gender difference in favorite activities in this study is in line with  
8 this explanation; 3) even in the same activity, males are also more likely to experience  
9 injuries due to high competitiveness and resistance.<sup>22</sup> Collectively, males are more  
10 vulnerable to PARI than females. Future interventions should address the gender  
11 discrepancy.

12  
13  
14  
15  
16  
17  
18  
19  
20  
21  
22  
23  
24  
25  
26 In our study, more than 70% of the participants were physically active according to  
27 the WHO's recommendations (70.2%), with the prevalence being higher than those  
28 found in other similar studies on Chinese university students (in which PA levels were  
29 also self-reported).<sup>23</sup> Increased PA has been reported in several recent studies as a  
30 result of the global PA promotion campaign.<sup>24</sup> In the past decades, the Chinese  
31 government has been making great efforts to promote PA. Our results may also reflect  
32 its effect on university students. Nevertheless, individuals turn to over-report their PA  
33 levels.<sup>25</sup> We could not avoid this possibility, which may have resulted in  
34 over-estimated PA levels of the participants. However, it may not be reasonable to  
35 assume that students with PARI would be more (or less) likely to over-report their PA  
36 than non-PARI ones. Thus, the estimations of the elevated risks of PA might be still  
37 robust.

1  
2  
3  
4 We found that PA involvements were positively and significantly related with  
5  
6 PARI occurrences, with frequency of leisure-time VPA being the predominant risk  
7  
8 factor. Highly consistent results have been found on the elevated risks of some  
9  
10 training characteristics for injuries, including high frequency, high vigorous intensity,  
11  
12 and long duration,<sup>22 26</sup> which should receive sufficient attentions from researchers and  
13  
14 policy-makers when promoting PA among the public. Unfortunately, neither the  
15  
16 WHO's information sheet on recommended PA, which is most commonly  
17  
18 disseminated to the public, nor its full report provides any suggestion on frequency  
19  
20 and duration for safety.<sup>4</sup> It is stated in the full report that "activity-related adverse  
21  
22 events such as musculoskeletal injuries are common but are usually minor especially  
23  
24 for moderate-intensity activities such as walking."<sup>4</sup> However, PARI may not be as  
25  
26 minor as it states, if being given a full consideration on both short-term and long-term  
27  
28 adverse effects on health.<sup>11 27</sup> For instances, acutely, PARI counts for the largest  
29  
30 proportion of non-fatal injuries, a top health problem among young  
31  
32 adults.<sup>9</sup> Chronically, previous joint injury history, a major type of PARI, was found to  
33  
34 increase the likelihood of osteoarthritis by 2.8- to 6.4-fold.<sup>27</sup> Osteoarthritis is the  
35  
36 single most common cause of disability in the elderly, affecting about 15% of the  
37  
38 entire population.<sup>28</sup> There are several recommendations related to frequency and  
39  
40 duration existing. For example, the American Diabetes Association (ADA) suggests a  
41  
42 frequency of MVPA at least 3 days/week with a non-exercise interval less than two  
43  
44 consecutive days, and that of resistance exercise at least 2 times/week on  
45  
46  
47  
48  
49  
50  
51  
52  
53  
54

1  
2  
3 non-consecutive days.<sup>29</sup> A training frequency of 3-5 days/week at an intensity level of  
4  
5 55/65% to 90% of maximum heart rate and a duration of 20-60 minutes of continuous  
6  
7 or intermittent of aerobic activity are recommended for developing and maintaining  
8  
9 fitness effects.<sup>30</sup> However, none of them is made for the safety purpose. Obviously,  
10  
11 there is a knowledge gap in safe frequency and duration of PA (in particular VPA),  
12  
13 which warrants further studies. In addition, safety issues should be emphasized and  
14  
15 disseminated to the public along with the recommendations.  
16  
17  
18  
19  
20

21 In this study, Year 1 students, sports team members, and those with insufficient  
22  
23 sleep duration were more likely to suffer from PARI. Two possibilities might be  
24  
25 attributed to the higher risk among Year 1 students: 1) after being released from heavy  
26  
27 academic burdens undertaken in secondary schools and becoming independent from  
28  
29 their parents, there might be a sharp increase in PA among them and result in the  
30  
31 elevated risk for injury;<sup>13</sup> 2) they are younger than those in Years 2 and 3. Thus,  
32  
33 adventurousness and impulsiveness inherent in youth, with relatively poor  
34  
35 self-restraint might also play a role.<sup>31 32</sup> Compared to their counterparts, sports team  
36  
37 members in this study were about 1- to 2-fold more likely to suffer from PARI. This  
38  
39 further proves that we may not simply apply the results observed from collegiate  
40  
41 athletes to the general students. Insufficient sleep duration may increase the risk for  
42  
43 PARI via physical fatigue and impaired cognitive performance, such as cognitive  
44  
45 slowing and decreased vigilance.<sup>33</sup>  
46  
47  
48  
49  
50  
51

52  
53 To our surprise, we found that the PARI incidence rate among Shantou students  
54  
55

1  
2  
3 was double those in the other two cities (33.9% vs. 12.3% and 15.0%), which could  
4  
5 not be explained by all variables in this study, including study year, sports team  
6  
7 member, PA indicators, and sleep duration (Supplementary Table S2). Both Shantou  
8  
9 and Hong Kong are located in southern China, sharing similar climate and climate  
10  
11 related sports habits, whilst Jinan is a northern city. Thus, it may be impossible that  
12  
13 the large between-city difference in PARI was attributable to the geographical factors.  
14  
15  
16  
17  
18  
19  
20  
21  
22  
23  
24  
25  
26  
27  
28  
29  
30  
31  
32  
33  
34  
35  
36  
37  
38  
39  
40  
41  
42  
43  
44  
45  
46  
47  
48  
49  
50  
51  
52  
53  
54  
55  
56  
57  
58  
59  
60

Though the sports infrastructure of a university might have potential influences on PARI occurrences among its students, both Shantou and Jinan belong to the Mainland China, where sports facilities and surveillance system across universities are similar. We therefore ruled out this possibility. In addition, the economic in Shantou is developed least among the three cities, its less developed urban environments outside universities might have resulted in its highest PARI incidence rate, compared to the other two cities.<sup>34</sup> Unfortunately, we could not provide supporting evidence on this hypothesis, as we did not collect detailed information about places of the PARI occurrences. It is worth further studying on possible reasons of the large between-city difference in PARI.

## Conclusions

We concluded that PARI was common among university students in China. Frequency of leisure-time VPA was the strongest risk factor among all PA variables. In addition, males, Year 1 students, sports team members, and those with insufficient sleep were more vulnerable to PARI. Further studies, with a prospective study design

1  
2  
3 and adopting both objective and subjective PA measurements, are warranted to  
4  
5 confirm our findings. Nevertheless, there is an urgent call for actions to prevent them  
6  
7 from PARI, with a full consideration of the risk factors found in this study. Safety  
8  
9 issues should also be involved and emphasized when promoting PA among the public.  
10  
11  
12

## 13 14 **References**

- 15  
16  
17 1. Janssen I, Leblanc AG. Systematic review of the health benefits of physical activity and  
18  
19 fitness in school-aged children and youth. *International Journal of Behavioral Nutrition*  
20  
21 and Physical Activity 2010;**7**(1):1-16.  
22  
23  
24 2. Penedo FJ, Dahn JR. Exercise and well-being: a review of mental and physical health  
25  
26 benefits associated with physical activity. *Current Opinion in Psychiatry*  
27  
28 2005;**18**(2):189-93.  
29  
30  
31 3. Garber CE, Blissmer B, Deschenes MR, et al. Quantity and Quality of Exercise for  
32  
33 Developing and Maintaining Cardiorespiratory, Musculoskeletal, and Neuromotor  
34  
35 Fitness in Apparently Healthy Adults: Guidance for Prescribing Exercise. *Medicine*  
36  
37 and Science in Sports and Exercise 2011;**43**(7):1334-59.  
38  
39  
40  
41 4. World Health Organization. Global Recommendations on Physical Activity for Health 2010.  
42  
43 (Data is available on  
44  
45 [http://apps.who.int/iris/bitstream/10665/44399/1/9789241599979\\_eng.pdf](http://apps.who.int/iris/bitstream/10665/44399/1/9789241599979_eng.pdf)).46  
47  
48 5. Mattila V, Parkkari J, Kannus P, et al. Occurrence and Risk Factors of Unintentional Injuries  
49  
50 among 12- to 18-Year-Old Finns: A Survey of 8219 Adolescents. *European Journal of*  
51  
52 *Epidemiology* 2004;**19**(5):437-44.  
53  
54  
55

- 1  
2  
3  
4 6. Mattila VM, Parkkari J, Koivusilta L, et al. Participation in sports clubs is a strong predictor of  
5  
6 injury hospitalization: a prospective cohort study. *Scandinavian Journal of Medicine &*  
7  
8 *Science in Sports* 2009;**19**(2):267-73.  
9
- 10  
11 7. Verhagen E, Collard D, Paw MCA, et al. A prospective cohort study on physical activity and  
12  
13 sports-related injuries in 10-12-year-old children. *British Journal of Sports Medicine*  
14  
15 2009;**43**(13):1031-35.  
16
- 17  
18 8. Gao Y LY, Duan Y, Lee KL. A pilot study on physical activity related injury (PARI) in primary  
19  
20 school children in Hong Kong. *Inj Med [Internet]* 2015;**5**(1):19-25.  
21  
22
- 23  
24 9. Pickett W, Molcho M, Simpson K, et al. Cross national study of injury and social  
25  
26 determinants in adolescents. *Injury Prevention Journal of the International Society for*  
27  
28 *Child & Adolescent Injury Prevention* 2005;**11**(4):213-8.  
29
- 30  
31 10. Roos EM. Joint injury causes knee osteoarthritis in young adults. *Current Opinion in*  
32  
33 *Rheumatology* 2005;**17**(2):195-200.  
34
- 35  
36 11. Emery C, Tyreman H. Sport participation, sport injury, risk factors and sport safety  
37  
38 practices in Calgary and area junior high schools. *Paediatrics & Child Health*  
39  
40 2009;**14**(7):439-44.  
41
- 42  
43 12. Gignac MA, Cao X, Ramanathan S, et al. Perceived personal importance of exercise and  
44  
45 fears of re-injury: a longitudinal study of psychological factors related to activity after  
46  
47 anterior cruciate ligament reconstruction. *BMC Sports Science, Medicine and*  
48  
49 *Rehabilitation* 2015;**7**(4):1-9.  
50
- 51  
52 13. Hubbard-Turner T, Turner MJ. Physical Activity Levels in College Students With Chronic  
53  
54



- 1  
2  
3 Ankle Instability. *J Athl Train* 2015;**50**(7):742-7.  
4  
5  
6 14. Kerr ZY, Hayden R, Barr M, et al. Epidemiology of National Collegiate Athletic Association  
7  
8 Women's Gymnastics Injuries, 2009-2010 Through 2013-2014. *J Athl Train*  
9  
10 2015;**50**(8):870-8.  
11  
12  
13 15. Rosa BB, Asperti AM, Helito CP, et al. Epidemiology of sports injuries on collegiate  
14  
15 athletes at a single center. *Acta Ortop Bras* 2014;**22**(6):321-4.  
16  
17  
18 16. Kulavic K, Hultquist CN, McLester JR. A comparison of motivational factors and barriers to  
19  
20 physical activity among traditional versus nontraditional college students. *J Am Coll*  
21  
22 *Health* 2013;**61**(2):60-6.  
23  
24  
25 17. World Health Organization. Chronic diseases and health promotion. Global Physical  
26  
27 Activity Surveillance. (Data is available on  
28  
29 [http://www.who.int/chp/steps/GPAQ\\_CH.pdf?ua=1](http://www.who.int/chp/steps/GPAQ_CH.pdf?ua=1)).  
30  
31  
32  
33 18. Bull FC, Maslin TS, Armstrong T. Global Physical Activity Questionnaire (GPAQ): Nine  
34  
35 Country Reliability and Validity Study. *J Phys Act Health* 2009;**6**(6):790-804.  
36  
37  
38 19. Claire L Cleland RFH, Frank Kee, Margaret E Cupples, James F Sallis, Mark A Tully  
39  
40 Validity of the Global Physical Activity Questionnaire (GPAQ) in assessing levels and  
41  
42 change in moderate-vigorous physical activity and sedentary behaviour. *BMC Public*  
43  
44 *Health* 2014;**14**:1255-65.  
45  
46  
47 20. Gutierrez G, Sills M, Bublitz CD, et al. Sports-related injuries in the United States: who gets  
48  
49 care and who does not. *Clinical Journal of Sport Medicine Official Journal of the*  
50  
51 *Canadian Academy of Sport Medicine* 2006;**16**(2):136-41.  
52  
53  
54

- 1  
2  
3  
4 21. Gilchrist J, Haileyesus T, Murphy MW, et al. Nonfatal Sports and Recreation Heat Illness  
5  
6 Treated in Hospital Emergency Departments — United States, 2001–2009. *Mmwr*  
7  
8 Morbidity & Mortality Weekly Report 2011;**60**(29):977-80.  
9
- 10  
11 22. Pons-Villanueva J, Segui-Gomez M, Martinez-Gonzalez MA. Risk of injury according to  
12  
13 participation in specific physical activities: a 6-year follow-up of 14 356 participants of  
14  
15 the SUN cohort. *Int J Epidemiol* 2010;**39**(2):580-7.  
16  
17
- 18 23. Abdullah AS, Wong CM, Yam HK, et al. Factors related to non-participation in physical  
19  
20 activity among the students in Hong Kong. *International Journal of Sports Medicine*  
21  
22 2005;**26**(7):611-5.  
23  
24
- 25 24. Bloemers F, Collard D, Paw MCA, et al. Physical inactivity is a risk factor for physical  
26  
27 activity-related injuries in children. *Br J Sports Med* 2012;**46**(9):669-74.  
28  
29
- 30 25. Taylor CB, Coffey T, Berra K, et al. Seven-day activity and self-report compared to a direct  
31  
32 measure of physical activity. *American Journal of Epidemiology* 1986;**123**(3):818-24.  
33  
34
- 35 26. Jones BH, Cowan DN, Tomlinson JP, et al. Epidemiology of injuries associated with  
36  
37 physical training among young men in the army. *Medicine & Science in Sports &*  
38  
39 *Exercise* 1993;**25**(2):197-203.  
40  
41
- 42 27. Richmond SA, Fukuchi RK, Ezzat A, et al. Are joint injury, sport activity, physical activity,  
43  
44 obesity, or occupational activities predictors for osteoarthritis? A systematic review. *J*  
45  
46 *Orthop Sports Phys Ther* 2013;**43**(8):515-B19.  
47  
48
- 49  
50 28. World Health Organization. Chronic diseases and health promotion. Chronic rheumatic  
51  
52 conditions. (Data is available on <http://www.who.int/chp/topics/rheumatic/en/>).  
53  
54

- 1  
2  
3  
4 29. M Chimen AK, K Nirantharakumar, T T Pang, R Andrews, P Narendran. What are the  
5  
6 health benefits of physical activity in type 1 diabetes mellitus? A literature review.  
7  
8 Diabetologia 2012;**55**:542-51.  
9
- 10  
11 30. Pollock ML GG, Butcher JD, et al. The recommended quantity and quality of exercise for  
12  
13 developing and maintaining cardiorespiratory and muscular fitness, and flexibility in  
14  
15 healthy adults. Med Sci Sports Exerc 1998;**30**:975-91.  
16  
17
- 18 31. Russell K, Davison C, King N, et al. Understanding clusters of risk factors across different  
19  
20 environmental and social contexts for the prediction of injuries among Canadian youth.  
21  
22 Injury 2016;**47**(5):1143-50.  
23  
24
- 25 32. Pickett W, Dostaler S, Craig W, et al. Associations between risk behavior and injury and  
26  
27 the protective roles of social environments: an analysis of 7235 Canadian school  
28  
29 children. Injury Prevention Journal of the International Society for Child & Adolescent  
30  
31 Injury Prevention 2006;**12**(2):87-92.  
32  
33
- 34 33. Mah CD, Mah KE, Kezirian EJ, et al. The effects of sleep extension on the athletic  
35  
36 performance of collegiate basketball players. Sleep 2011;**34**(7):943-50.  
37  
38
- 39 34. National Bureau of Statistics of the People's Republic of China. (Data is available on  
40  
41 <http://www.stats.gov.cn/>).  
42  
43  
44

45 **Contributors:** GY, JXC and LPL conceived and designed the questionnaire. WCC,  
46  
47 LJG, JJW, JHL and HK collected data. GY and WCC performed the statistical  
48  
49 analyses and drafted the manuscript. All authors drafted, edited and approved the final  
50  
51 manuscript.  
52  
53  
54

1  
2  
3  
4 **Data sharing statement:** No additional data sharing available.  
5  
6  
7  
8  
9  
10  
11  
12  
13  
14  
15  
16  
17  
18  
19  
20  
21  
22  
23  
24  
25  
26  
27  
28  
29  
30  
31  
32  
33  
34  
35  
36  
37  
38  
39  
40  
41  
42  
43  
44  
45  
46  
47  
48  
49  
50  
51  
52  
53  
54  
55  
56  
57  
58  
59  
60

For peer review only

**Table S1 Comparison of all PA indicators between-gender among university students in China (N=4758)**

| Characteristics                | Male<br>(N=1343)<br>median (IQR) | Female<br>(N=3415)<br>median (IQR) | Z       | P-value |
|--------------------------------|----------------------------------|------------------------------------|---------|---------|
| <b>Domestic/work/study</b>     |                                  |                                    |         |         |
| <u>VPA<sup>1</sup></u>         |                                  |                                    |         |         |
| Frequency, d/week              | 0 (0, 2)                         | 0 (0, 1)                           | -13.763 | <0.001  |
| Duration, min/d                | 0 (0, 30)                        | 0 (0, 10)                          | -14.181 | <0.001  |
| Volume, min/week               | 0 (0, 90)                        | 0 (0, 10)                          | -14.336 | <0.001  |
| <u>MPA<sup>2</sup></u>         |                                  |                                    |         |         |
| Frequency, d/week              | 1 (0, 3)                         | 1 (0, 2)                           | -9.007  | <0.001  |
| Duration, min/d                | 20 (0, 40)                       | 10 (0, 30)                         | -10.488 | <0.001  |
| Volume, min/week               | 40 (0, 120)                      | 10 (0, 60)                         | -10.352 | <0.001  |
| <u>MVPA<sup>3</sup></u>        |                                  |                                    |         |         |
| Volume, min/week               | 60 (0, 150)                      | 20 (0, 90)                         | -13.226 | <0.001  |
| <b>Transportation</b>          |                                  |                                    |         |         |
| <u>MPA<sup>2</sup></u>         |                                  |                                    |         |         |
| Frequency, d/week              | 5 (2, 7)                         | 5 (1, 7)                           | -4.213  | <0.001  |
| Duration, min/d                | 30 (12, 50)                      | 30 (10, 40)                        | -1.571  | 0.116   |
| Volume, min/week               | 135 (40, 240)                    | 120 (30, 210)                      | -3.496  | <0.001  |
| <b>Sports and leisure-time</b> |                                  |                                    |         |         |
| <u>VPA<sup>1</sup></u>         |                                  |                                    |         |         |
| Frequency, d/week              | 1 (0, 2)                         | 0 (0, 1)                           | -15.195 | <0.001  |
| Duration, min/d                | 15 (0, 60)                       | 0 (0, 20)                          | -15.473 | <0.001  |
| Volume, min/week               | 20 (0, 100)                      | 0 (0, 30)                          | -15.846 | <0.001  |
| <u>MPA<sup>2</sup></u>         |                                  |                                    |         |         |
| Frequency, d/week              | 1 (0, 3)                         | 0 (0, 2)                           | -7.851  | <0.001  |

|                          |                |                |         |        |
|--------------------------|----------------|----------------|---------|--------|
| Duration, min/d          | 20 (0, 40)     | 0 (0, 30)      | -8.601  | <0.001 |
| Volume, min/week         | 40 (0, 100)    | 0 (0, 75)      | -8.766  | <0.001 |
| <u>MVPA</u> <sup>3</sup> |                |                |         |        |
| Volume, min/week         | 90 (0, 210)    | 30 (0, 120)    | -13.808 | <0.001 |
| Total VPA <sup>1</sup>   |                |                |         |        |
| Volume, min/week         | 60 (0, 180)    | 0 (0, 60)      | -17.387 | <0.001 |
| Total MPA <sup>2</sup>   |                |                |         |        |
| Volume, min/week         | 90 (0, 210)    | 56 (0, 140)    | -10.616 | <0.001 |
| Total MVPA <sup>3</sup>  |                |                |         |        |
| Volume, min/week         | 360 (170, 645) | 230 (105, 420) | -12.527 | <0.001 |

<sup>1</sup>: VPA, vigorous-intensity physical activity.

<sup>2</sup>: MPA, moderate-intensity physical activity.

<sup>3</sup>: MVPA, moderate- and vigorous-intensity physical activity.

**Table S2 Comparison of all variables among university students in three Chinese cities (N=4758)**

| Characteristics            | Shantou<br>(N=2123)<br>median (IQR) | Jinan<br>(N=1267)<br>median (IQR) | Hong Kong<br>(N=1368)<br>median (IQR) | $\chi^2$ | P-value |
|----------------------------|-------------------------------------|-----------------------------------|---------------------------------------|----------|---------|
| <b>Domestic/work/study</b> |                                     |                                   |                                       |          |         |
| <u>VPA</u> <sup>1</sup>    |                                     |                                   |                                       |          |         |
| Frequency, d/week          | 0 (0, 0)                            | 0 (0, 1)                          | 1 (0, 2)                              | 430.847  | <0.001  |
| Duration, min/d            | 0 (0, 0)                            | 0 (0, 10)                         | 10 (0, 40)                            | 459.346  | <0.001  |
| Volume, min/week           | 0 (0, 0)                            | 0 (0, 10)                         | 15 (0, 90)                            | 451.585  | <0.001  |
| <u>MPA</u> <sup>2</sup>    |                                     |                                   |                                       |          |         |
| Frequency, d/week          | 1 (0, 2)                            | 1 (0, 3)                          | 1 (0, 2)                              | 41.561   | <0.001  |
| Duration, min/d            | 10 (0, 30)                          | 15 (0, 30)                        | 20 (0, 40)                            | 54.763   | <0.001  |
| Volume, min/week           | 10 (0, 60)                          | 30 (0, 90)                        | 30 (0, 90)                            | 37.396   | <0.001  |
| <u>MVPA</u> <sup>3</sup>   |                                     |                                   |                                       |          |         |

|                                |                |                |                  |         |        |
|--------------------------------|----------------|----------------|------------------|---------|--------|
| Volume, min/week               | 20 (0, 80)     | 40 (0, 120)    | 60 (0, 180)      | 162.353 | <0.001 |
| <b>Transportation</b>          |                |                |                  |         |        |
| <u>MPA<sup>2</sup></u>         |                |                |                  |         |        |
| Frequency, d/week              | 5 (2, 7)       | 5 (2, 7)       | 4 (1, 6)         | 35.462  | <0.001 |
| Duration, min/d                | 30 (10, 40)    | 30 (15, 50)    | 30 (10, 40)      | 12.776  | 0.002  |
| Volume, min/week               | 140 (40, 210)  | 120 (40, 210)  | 100 (30, 210)    | 13.614  | 0.001  |
| <b>Sports and leisure-time</b> |                |                |                  |         |        |
| <u>VPA<sup>1</sup></u>         |                |                |                  |         |        |
| Frequency, d/week              | 0 (0, 1)       | 0 (0, 1)       | 1 (0, 2)         | 167.345 | <0.001 |
| Duration, min/d                | 0 (0, 15)      | 0 (0, 30)      | 10 (0, 60)       | 215.755 | <0.001 |
| Volume, min/week               | 0 (0, 20)      | 0 (0, 60)      | 10 (0, 90)       | 196.872 | <0.001 |
| <u>MPA<sup>2</sup></u>         |                |                |                  |         |        |
| Frequency, d/week              | 1 (0, 2)       | 1 (0, 3)       | 1 (0, 2)         | 53.535  | <0.001 |
| Duration, min/d                | 0 (0, 30)      | 20 (0, 30)     | 10 (0, 30)       | 48.271  | <0.001 |
| Volume, min/week               | 0 (0, 80)      | 30 (0, 90)     | 15 (0, 78.75)    | 52.548  | <0.001 |
| <u>MVPA<sup>3</sup></u>        |                |                |                  |         |        |
| Volume, min/week               | 30 (0, 100)    | 60 (0, 150)    | 60 (0, 180)      | 89.474  | <0.001 |
| <b>Total VPA<sup>1</sup></b>   |                |                |                  |         |        |
| Volume, min/week               | 0 (0, 60)      | 0 (0, 90)      | 60 (0, 180)      | 428.887 | <0.001 |
| <b>Total MPA<sup>2</sup></b>   |                |                |                  |         |        |
| Volume, min/week               | 50 (0, 140)    | 80 (0, 180)    | 60 (0, 168.75)   | 51.876  | <0.001 |
| <b>Total MVPA<sup>3</sup></b>  |                |                |                  |         |        |
| Volume, min/week               | 230 (110, 440) | 270 (125, 500) | 286.5 (120, 570) | 41.574  | <0.001 |
|                                | <i>n (%)</i>   | <i>n (%)</i>   | <i>n (%)</i>     |         |        |
| <b>Study Year</b>              |                |                |                  |         |        |
| Year 1                         | 698 (32.9)     | 453 (35.8)     | 345 (25.2)       | 147.006 | <0.01  |

|                                      |             |             |             |         |       |
|--------------------------------------|-------------|-------------|-------------|---------|-------|
| Year 2                               | 691 (32.5)  | 443 (35.0)  | 328 (24.0)  |         |       |
| Year 3                               | 734(34.6)   | 371 (29.3)  | 695 (50.8)  |         |       |
| <b>University sports team member</b> |             |             |             |         |       |
| No                                   | 1977 (93.1) | 1153 (91.0) | 1132 (82.7) | 99.654  | <0.01 |
| Yes                                  | 146 (6.9)   | 114 (9.0)   | 236 (17.3)  |         |       |
| <b>Other sports team member</b>      |             |             |             |         |       |
| No                                   | 1989 (93.7) | 1196 (94.4) | 1287 (94.1) | 0.732   | 0.694 |
| Yes                                  | 134 (6.3)   | 71 (5.6)    | 81 (5.9)    |         |       |
| <b>Sleep duration</b>                |             |             |             |         |       |
| <6.00 h/d                            | 69 (3.3)    | 29 (2.3)    | 189 (13.87) | 338.655 | <0.01 |
| 6.00-6.99 h/d                        | 406 (19.1)  | 187 (14.8)  | 376 (27.5)  |         |       |
| 7.00-7.99 h/d                        | 841 (39.6)  | 608 (48.0)  | 433(31.7)   |         |       |
| 8.00-8.99 h/d                        | 563 (26.5)  | 353 (27.9)  | 270 (19.7)  |         |       |
| ≥ 9.00 h/d                           | 244 (11.5)  | 90(7.1)     | 100 (7.3)   |         |       |

<sup>1</sup>: VPA, vigorous-intensity physical activity.

<sup>2</sup>: MPA, moderate-intensity physical activity.

<sup>3</sup>: MVPA, moderate- and vigorous-intensity physical activity.



# BMJ Open

## Physical activity-related injuries among university students: a multi-center cross-sectional study in China

|                                 |                                                                                                                                                                                                                                                                                                                                                                                                                                                                                                                                                                                                                                  |
|---------------------------------|----------------------------------------------------------------------------------------------------------------------------------------------------------------------------------------------------------------------------------------------------------------------------------------------------------------------------------------------------------------------------------------------------------------------------------------------------------------------------------------------------------------------------------------------------------------------------------------------------------------------------------|
| Journal:                        | <i>BMJ Open</i>                                                                                                                                                                                                                                                                                                                                                                                                                                                                                                                                                                                                                  |
| Manuscript ID                   | bmjopen-2018-021845.R1                                                                                                                                                                                                                                                                                                                                                                                                                                                                                                                                                                                                           |
| Article Type:                   | Research                                                                                                                                                                                                                                                                                                                                                                                                                                                                                                                                                                                                                         |
| Date Submitted by the Author:   | 15-May-2018                                                                                                                                                                                                                                                                                                                                                                                                                                                                                                                                                                                                                      |
| Complete List of Authors:       | Gao, Gemma Yang; Hong Kong Baptist University, Department of Physical Education<br>Cai, Weicong; Shantou University Medical College, Injury Preventive Research Center<br>Gao, Lijie; Shandong University School of Public Health, Department of Epidemiology<br>Wang, Jingjing; China Institute of Sport Science, Mass Sports Research Center<br>Liang, Jiehui; Shantou University Medical College, Injury Preventive Research Center<br>Kwok, Heather ; Hong Kong Baptist University, Department of Physical Education<br>Jia, Cun-Xian; Shandong University School of Public Health, Department of Epidemiology<br>Li, Liping |
| <b>Primary Subject Heading</b>: | Epidemiology                                                                                                                                                                                                                                                                                                                                                                                                                                                                                                                                                                                                                     |
| Secondary Subject Heading:      | Epidemiology                                                                                                                                                                                                                                                                                                                                                                                                                                                                                                                                                                                                                     |
| Keywords:                       | EPIDEMIOLOGY, PHYSICAL ACTIVITY, SPORTS INJURY, RISK FACTORS, YOUTH                                                                                                                                                                                                                                                                                                                                                                                                                                                                                                                                                              |
|                                 |                                                                                                                                                                                                                                                                                                                                                                                                                                                                                                                                                                                                                                  |

SCHOLARONE™  
Manuscripts

1  
2  
3 **Title: Physical activity-related injuries among university students: a multi-center**  
4 **cross-sectional study in China**  
5

6 Running title: Physical activity-related injury among youth  
7  
8  
9

10 Gemme Yang Gao<sup>2</sup>, Weicong Cai<sup>1</sup>, Lijie Gao<sup>3</sup>, Jingjing Wang<sup>4</sup>, Jiehui Liang<sup>1</sup>,  
11 Heather Kwok<sup>2</sup>, Cunxian Jia<sup>3</sup>, Liping Li<sup>1\*</sup>  
12

13 <sup>1</sup> Injury Preventive Research Center, Shantou University Medical College, Shantou,  
14 China  
15

16 <sup>2</sup> Department of Physical Education, Hong Kong Baptist University, Hong Kong,  
17 China  
18

19 <sup>3</sup> Department of Epidemiology, Shandong University School of Public Health,  
20 Shandong, China  
21

22 <sup>4</sup> Mass Sports Research Center, China Institute of Sport Science, Beijing, China  
23

24 \* Corresponding authors. Liping Li, e-mail: [lppli@stu.edu.cn](mailto:lppli@stu.edu.cn)  
25

26 Injury Preventive Research Center, Shantou University Medical College, No.22  
27 Xinling Road, Shantou 515041, Guangdong, China.  
28

29 Tel: 0086-0754-88900467; Fax: 0086-0754-88550372  
30  
31  
32  
33  
34  
35  
36  
37  
38  
39  
40  
41  
42  
43  
44  
45  
46  
47  
48  
49  
50  
51  
52  
53  
54  
55  
56  
57  
58  
59  
60

## Abstract

**Objectives:** This study aimed to investigate the epidemiologic characteristics and preliminarily explore risk factors of physical activity-related injury (PARI) occurrences among Chinese university students via a multi-center mixed survey.

**Design:** Cross-sectional study.

**Participants:** By the method of cluster random sampling, a total of 4758 undergraduates graded 1-3 in nine universities in three Chinese cities were invited and completed the self-administered online questionnaires during March and April, 2017.

**Main outcome measures:** PARI in the past 12 months.

**Results:** Of 4758 participants, 1081 sustained PARI in the past 12 months, with an overall PARI incidence rate of 22.7% (27.3% [367/1343] in males and 20.9% [714/3415] in females). Around one quarter of the injured (26.4%) suffered from PARI at least three episodes. More than half of the injured experienced physical activity (PA) absenteeism and sought medical attention. All PA indicators were significantly and positively associated with PARI, with the frequency of sports and leisure-time vigorous-intensity PA (VPA) participation being the strongest (adjusted OR: 1.079, 95% CI: 1.018-1.144). Moreover, males (OR=1.199), Shantou students (OR=4.239), Year 1 students (OR=1.287), university and other sports team members (OR=1.717-2.360), and those with insufficient sleep time (OR=1.262-1.333) were also at higher risks for PARI experience.

1  
2  
3 **Conclusions:** PARI was prevalent among university students in China. The frequency  
4  
5  
6 of sports and leisure-time VPA participation was the strongest risk factor of PARI  
7  
8 among all PA indicators. The above data can inform future programs for the  
9  
10 injury-intervention in university students. Safety issues should also be involved and  
11  
12 emphasized when promoting PA among the public to reduce PARI occurrence.  
13  
14  
15

## 16 **Article summary**

### 17 **Strengths and limitations of this study**

- 18  
19 1) It is the first of this kind of publications to explore the epidemic and risk factors  
20  
21 of PARI among Chinese general university students.  
22  
23
- 24  
25 2) The cross-sectional study design and retrospectively collected data limit causal  
26  
27 and temporal inference in this study. For example, it is plausible that some injured  
28  
29 students would rate their PA levels higher if not injured since their PA levels  
30  
31 might have been affected by their injuries, which may have resulted in the  
32  
33 under-estimation of the PA's risk for injuries. In addition, it is also plausible that  
34  
35 students who were more often engaged in PA would be more likely to remember  
36  
37 their injuries since the injuries might have a greater impact on these students. This  
38  
39 possibility may have led us to over-estimating the relationship between PA levels  
40  
41 and PARI. PA levels in this study were measured once only, we therefore could  
42  
43 not explain the rationale that PARI contributes to the reduction of PA. Our team  
44  
45 group is conducting a prospective cohort study to confirm findings of this study.  
46  
47  
48  
49  
50  
51  
52  
53  
54

- 1  
2  
3  
4 3) All information was self-reported, which have resulted in recall bias (e.g., some  
5  
6 participants may have forgotten to report minor and earlier injury episodes) and  
7  
8 report bias (e.g., some participants may have over-reported on their PA levels, as  
9  
10 it is a socially desirable behavior) and threatened our results to some extent.  
11  
12  
13  
14 4) We could not investigate activity-specific PARI occurrences as the Global  
15  
16 Physical Activity Questionnaire (GPAQ) does not capture specific activities the  
17  
18 participants undertook.  
19  
20  
21

### 22 **Funding statement**

23  
24 This work was supported by the National Natural Science Foundation of China  
25  
26 grant number 31640038.  
27  
28

### 29 **Competing interests**

30  
31 The authors declare that they have no competing interests.  
32  
33

### 34 **Introduction**

35  
36 Physical, social and psychological benefits of engaging in regular physical  
37  
38 activity (PA) have been well documented, including increased cardiorespiratory and  
39  
40 muscular fitness and bone density, and reduced risks for non-communicable  
41  
42 diseases.<sup>1-3</sup> Insufficient PA has been recognized as one of the top three risk behaviors  
43  
44 in the development of morbidity and mortality associated with cardiovascular diseases  
45  
46 and other major chronic diseases, such as diabetes and obesity.<sup>4</sup> In order to achieve  
47  
48 and maintain individual health at an optimal level, World Health Organization (WHO)  
49  
50 has recommended that adults (18-64 years old) should undertake at least 150 minutes  
51  
52  
53  
54

1  
2  
3 of moderate-intensity PA (MPA), or at least 75 minutes of vigorous-intensity PA  
4  
5 (VPA), or an equivalent combination of moderate- and vigorous-intensity PA (MVPA)  
6  
7 every week.<sup>4</sup> With these advantages and recommendations of PA participation, almost  
8  
9 all countries and regions in the world have been engaged in the current global  
10  
11 campaign to promote PA.  
12  
13  
14  
15

16 Although the promotion of PA is a public health priority, being physically active  
17  
18 might increase the risk for injury.<sup>5-7</sup> Physical activity-related injury (PARI), also  
19  
20 known as sports and recreational activity-related injury, was defined as any injury  
21  
22 resulting from participation in PE class, sports activities or leisure time PA, such as  
23  
24 sprain, strain, fracture, contusion, and et al.<sup>8</sup> In fact, PARI contributes mostly to all  
25  
26 non-fatal injury, which ranks the top one health threat to relatively healthy adolescents  
27  
28 and young adults in many countries.<sup>4,9</sup> In a long term, it can also increase risks for  
29  
30 future injuries, osteoarthritis and other health problems in later life.<sup>10</sup> In addition,  
31  
32 PARI may be a barrier to adopting a more active lifestyle, which may further hinder  
33  
34 people from achieving optimal health.<sup>11,12</sup>  
35  
36  
37  
38  
39  
40

41 We have been conducting a series of studies on PARI. Results from previous  
42  
43 studies revealed that about 25.1%-32.1% of primary and secondary school students  
44  
45 in two Chinese cities had suffered from PARI in the past 12 months, suggesting that  
46  
47 PARI is prevalent among children and adolescents (Data not published yet). In China,  
48  
49 students in universities might be more active than those in primary and secondary  
50  
51 schools, as they have been released from heavy academic burdens and pressure for  
52  
53  
54

1  
2  
3 university admission. Moreover, they become independent from their parents and  
4  
5 therefore are more likely to engage in relatively risky activities which their parents  
6  
7 may not allow them to do before.<sup>13</sup> Thus, university students might be more  
8  
9 vulnerable to PARI. Though there is plenty of evidence about PARI among collegiate  
10  
11 athletes, it may not be suitable for general students because of the significant  
12  
13 differences in risk factors between the two groups, such as sports skills, training  
14  
15 intensity, competition level, and cardiorespiratory and muscle fitness level.<sup>14 15</sup>  
16  
17 However, few studies have been addressed the problem of PARI among general  
18  
19 university students.<sup>13 16</sup> We therefore conducted a multi-center cross-sectional study  
20  
21 among a sample of general university students in China, funded by the National  
22  
23 Natural Science Foundation of China (Grant No. 31640038), to obtain a better  
24  
25 understanding of the PARI epidemic. This paper presents findings from its baseline  
26  
27 survey, aiming to investigate the epidemiologic characteristics and preliminarily  
28  
29 identify potential risk factors of PARI occurrences among Chinese university  
30  
31 students.  
32  
33  
34  
35  
36  
37  
38  
39  
40

## 41 **Methods**

### 42 **Study Participants**

43  
44 The study was conducted in nine universities (eight comprehensive universities  
45  
46 and one normal university [where students are trained to become teachers in  
47  
48 kindergartens and primary and secondary schools]) in three Chinese cities, namely  
49  
50  
51  
52  
53  
54

1  
2  
3 Jinan, Shantou, and Hong Kong. Each city represents northern, southern, and special  
4 regions of China respectively. Via the method of cluster random sampling, a total of  
5  
6 5115 eligible students in Years 1-3 were invited to participate in the study during  
7  
8 March and April, 2017. Seniors (students in Years 4) were excluded as they are in the  
9  
10 transition period to work and their university lives are significantly different from the  
11  
12 others. In addition, those majoring in physical education (PE) were further excluded  
13  
14 from data analysis, as they differ significantly from others in terms of PA/sports  
15  
16 related factors. At last, a totally final valid sample of 4758 non-PE students in Years  
17  
18 1-3 completed the online survey, with a response rate of about 93.0%.

### 26 **Data collection**

27  
28  
29 The Qualtrics software (Qualtrics, Provo, UT) was used as the online platform of  
30  
31 the baseline questionnaire survey. Participants were enrolled in classes, or from  
32  
33 dormitories. The online questionnaire was self-administered, consisting of  
34  
35 demographics, PA habits, sedentary behaviors, sleep duration, and PARI experiences  
36  
37 in the past 12 months.

38  
39  
40 The demographic variables included university, study major, study year, gender,  
41  
42 age, residence type (dormitory, home, or others), any diagnosed chronic  
43  
44 disease/symptom, and sports team membership.

45  
46  
47 Participants' PA levels in a typical week in the past 12 months were asked using  
48  
49 the Global Physical Activity Questionnaire (GPAQ) Chinese version.<sup>17</sup> It is one of the  
50  
51



1  
2  
3 most commonly used PA questionnaires and possesses sound reliability and validity  
4  
5 (spearman's  $\rho=0.81$ ,  $\kappa=0.65$ ).<sup>18 19</sup> The GPAQ collects frequency (days/week)  
6  
7 and duration (cumulative minutes/day) of VPA and MPA in three domains, including  
8  
9 domestic/work/study, transportation (MPA only), and sports and leisure-time activities.  
10  
11 PA volume (cumulative minutes/week) was then calculated by duration multiplied by  
12  
13 frequency for each category of PA (VPA, MPA, and MVPA), in each domain and  
14  
15 overall, generating a total of 20 PA-related variables. Given that the GPAQ does not  
16  
17 provide information on specific activities the students participated, all participants  
18  
19 were further asked whether they had any sports or recreational activities they liked  
20  
21 and participated in often (i.e., favorite activities) in the past 12 months. Those with a  
22  
23 positive answer were further requested to provide the names of the activities (no more  
24  
25 than three).  
26  
27  
28  
29  
30  
31  
32

33 In terms of sedentary behaviors and sleep, duration (hours/day) was asked on  
34  
35 both a typical weekday and a typical weekend respectively. Average daily duration in  
36  
37 a week was then calculated and used to group the students into five categories.  
38  
39  
40

41 In this study, a countable PARI must meet at least one of the following three  
42  
43 consequences: the student 1) has to immediately stop the PA and/or cannot participate  
44  
45 in the next planned PA; and/or 2) is absent from class the next day; and/or 3) needs to  
46  
47 seek medical attention (including on-spot first aids, but excluding those using  
48  
49 bandages only).<sup>8</sup> If suffering from such a PARI in the past 12 months, the participants  
50  
51 were then asked to report the number of PARI in each consequence category.  
52  
53  
54

### **Ethics approval**

This study was strictly conducted in accordance with the Declaration of Helsinki. Prior to approaching potential students, approval was obtained from Shantou University Medical College ethics committee, Shandong University ethics committee, and Hong Kong Baptist University ethics committee. Explanatory statement and consent forms were distributed to all potential participants, and the hyperlink or QR code of questionnaire was subsequently given to the consenting students in the nominated classes or dormitories. The purpose and meaning of our study was verbally explained to the subjects prior to their completion of the questionnaires, and our trained personnel would answer any questions of clarification as participants arose during the session.

### **Statistical analysis**

Statistical analyses were performed using SPSS version 19.0 (SPSS Inc. Chicago, IL, USA). Continuous data which is normally (i.e., age) or not normally distributed (i.e., 20 PA-related variables) was described using mean (standard deviation, SD) or median (inter-quartile, IQR) respectively, while categorical variables were presented as number (percentage). In addition to the Pearson chi-square tests applied to evaluate the numbers and consequences of PARI between females and males, both univariate and multivariate logistic regression were fitted to estimate the risk of each study variable for PARI, where crude and adjusted odds ratios (ORs) and their 95%

1  
2  
3 confidence intervals (95% CIs) were generated respectively. Three steps were  
4  
5 undertaken in the multivariate analyses: Step one, in a multivariate model, all  
6  
7 socio-demographic variables were selected in both forward and backward manners  
8  
9 (likelihood ratio), with selection criteria of  $\alpha_{in}=0.10$  and  $\alpha_{out}=0.15$ . Adjusted ORs and  
10  
11 95% CIs of variables kept in the final model (i.e., significant variables) were then  
12  
13 derived from, including city, study year, gender, university/other sports team member,  
14  
15 and any chronic disease/symptom. For variables outside of the final model (i.e.,  
16  
17 insignificant variables, including age and residence type), their adjusted ORs and 95%  
18  
19 CIs were obtained after controlling for the significant variables (Table 1); Step two,  
20  
21 the risk of each life-style variable (including PA habits, sedentary behaviors, and sleep  
22  
23 duration) was assessed after controlling for the significant socio-demographic  
24  
25 variables in the first step (Table 2); Step three, a hierarchical model was performed to  
26  
27 consider all significant study variables together, with socio-demographic variables  
28  
29 being selected in the first block and life-style variables in the second (Table 3). A  
30  
31 two-sided *P*-value less than 0.05 was considered statistically significant for all tests.  
32  
33  
34  
35  
36  
37  
38  
39  
40

### 41 **Patient involvement**

42  
43 No patients were involved in the development of the research question or the  
44  
45 outcome measures, nor were they involved in developing plans for design or  
46  
47 implementation of the study. There are no plans to disseminate the results of the  
48  
49 research to study participants.  
50  
51  
52  
53  
54

## Results

Table 1 presents the distribution of the social-demographic characteristics and their risk estimations for PARI. Overall, the 4758 participants aged from 17 to 25 years old, with a mean age of 20.00 (SD: 1.382). More students were females (71.8%), living in dormitory (61.1%), and studying in Shantou (44.6%). Few students were sports team members or living with any chronic condition (3.7%-10.4%). About 1081 students (22.7%) suffered from at least one PARI in the past 12 months, with significantly higher risks being found in both types of sports team members and those living with chronic conditions (adjusted ORs: 1.561-3.136). In addition, students in Shantou, males, and those in Years 1 were more likely to experience PARI than their counterparts (adjusted ORs: 1.397-3.932). Age and residence type were not significantly associated with PARI.

**Table 1 Risks of socio-demographic characteristics for physical activity-related injury (PARI) among university students in China**

| Characteristics | All<br>(N=4758)<br>n (%) | Non-PARI<br>(N=3677)<br>n (%) | PARI<br>(N=1081)<br>n (%) | Adjusted<br>OR | 95% CI      |
|-----------------|--------------------------|-------------------------------|---------------------------|----------------|-------------|
| City            |                          |                               |                           |                |             |
| Jinan           | 1267 (26.6)              | 1111 (87.7)                   | 156 (12.3)                | 1 (ref.)       |             |
| Shantou         | 2123 (44.6)              | 1403 (66.1)                   | 720 (33.9)                | 3.932***       | 3.230~4.786 |
| Hong Kong       | 1368 (28.8)              | 1163 (85.0)                   | 205 (15.0)                | 1.084          | 0.841~1.396 |
| Study year      |                          |                               |                           |                |             |
| Year 1          | 1496 (31.4)              | 1125 (75.2)                   | 371 (24.8)                | 1.397**        | 1.109~1.760 |
| Year 2          | 1462 (30.7)              | 1121 (76.7)                   | 341 (23.3)                | 1.153          | 0.948~1.401 |
| Year 3          | 1800 (37.8)              | 1431 (79.5)                   | 369 (20.5)                | 1 (ref.)       |             |
| Gender          |                          |                               |                           |                |             |
| Male            | 1343 (28.2)              | 976 (72.7)                    | 367 (27.3)                | 1.404***       | 1.202~1.640 |
| Female          | 3415 (71.8)              | 2701 (79.1)                   | 714 (20.9)                | 1 (ref.)       |             |
| Residence type  |                          |                               |                           |                |             |

|                               |                   |                   |                   |                      |             |
|-------------------------------|-------------------|-------------------|-------------------|----------------------|-------------|
| Dormitory                     | 2908 (61.1)       | 2210 (76.0)       | 698 (24.0)        | 1 (ref.)             |             |
| Home                          | 1742 (36.6)       | 1377 (79.0)       | 365 (21.0)        | 1.016                | 0.861~1.198 |
| Others                        | 108 (2.3)         | 90 (83.3)         | 18 (16.7)         | 0.820                | 0.469~1.434 |
| University sports team member |                   |                   |                   |                      |             |
| No                            | 4262 (89.6)       | 3380 (79.3)       | 882 (20.7)        | 1 (ref.)             |             |
| Yes                           | 496 (10.4)        | 297 (59.9)        | 199 (40.1)        | 3.136 <sup>***</sup> | 2.528~3.889 |
| Other sports team member      |                   |                   |                   |                      |             |
| No                            | 4472 (94.0)       | 3512 (78.5)       | 960 (21.5)        | 1 (ref.)             |             |
| Yes                           | 286 (6.0)         | 165 (57.7)        | 121 (42.3)        | 2.182 <sup>***</sup> | 1.678~2.838 |
| Any chronic disease/symptom   |                   |                   |                   |                      |             |
| No                            | 4583 (96.3)       | 3563 (77.7)       | 1020 (22.3)       | 1 (ref.)             |             |
| Yes                           | 175 (3.7)         | 114 (65.1)        | 61 (34.9)         | 1.561 <sup>*</sup>   | 1.111~2.195 |
| Age ( $\bar{x}\pm s$ , years) | 20.00 $\pm$ 1.382 | 20.01 $\pm$ 1.426 | 19.98 $\pm$ 1.386 | 0.983                | 0.934~1.146 |

<sup>\*</sup>:  $P<0.05$ ; <sup>\*\*</sup>:  $P<0.01$ ; <sup>\*\*\*</sup>:  $P<0.001$ .

Adjusted ORs and 95% CIs of significant variables were calculated after controlling for each other, including city, study year, gender, university/other sports team member, and any chronic disease/symptom. Adjusted ORs and 95% CIs of insignificant variables (age and residence type) were obtained after controlling for the significant variables.

Table 2 shows the distribution of life-style variables and their risk assessments for PARI. The majority of the students engaged in sports and leisure-time PA (87.5%) and transport-related PA (82.1%). Medians and interquartile ranges (IQRs) for total volumes of VPA, MPA and MVPA (min/week) were 0 (0, 100), 60 (0, 150) and 255 (120, 490) respectively (Means and SDs for these 20 PA-related variables were available in supplementary table S1). Overall, 70.2% of university students were physically active according to the WHO's recommended PA for adults.<sup>4</sup> All PA indicators were positively and significantly related with PARI (adjusted ORs: 1.001-1.171), with the risk of the frequency of sports and leisure-time VPA participation being the highest. About 26.4% of students slept less than seven hours per day, and they were more prone to sustain PARI events (adjusted ORs: 1.425-1.428).

**Table 2 Risks of life-style variables for physical activity-related injury (PARI) among**

**university students in China**

| Characteristics                | All<br>(N=4758)<br>median (IQR) | Non-PARI<br>(N=3677)<br>median (IQR) | PARI<br>(N=1081)<br>median (IQR) | Adjusted<br>OR | 95% CI      |
|--------------------------------|---------------------------------|--------------------------------------|----------------------------------|----------------|-------------|
| <b>Domestic/work/study</b>     |                                 |                                      |                                  |                |             |
| <u>VPA<sup>1</sup></u>         |                                 |                                      |                                  |                |             |
| Frequency, d/week              | 0 (0, 1)                        | 0 (0, 1)                             | 0 (0, 2)                         | 1.168***       | 1.111~1.228 |
| Duration, min/d                | 0 (0, 20)                       | 0 (0, 15)                            | 0 (0, 30)                        | 1.008***       | 1.006~1.010 |
| Volume, min/week               | 0 (0, 30)                       | 0 (0, 20)                            | 0 (0, 60)                        | 1.002***       | 1.001~1.002 |
| <u>MPA<sup>2</sup></u>         |                                 |                                      |                                  |                |             |
| Frequency, d/week              | 1 (0, 2)                        | 1 (0, 2)                             | 1 (0, 3)                         | 1.124***       | 1.082~1.167 |
| Duration, min/d                | 10 (0, 30)                      | 10 (0, 30)                           | 20 (0, 30)                       | 1.005***       | 1.004~1.007 |
| Volume, min/week               | 20 (0, 60)                      | 10 (0, 60)                           | 40 (0, 100)                      | 1.001***       | 1.001~1.002 |
| <u>MVPA<sup>3</sup></u>        |                                 |                                      |                                  |                |             |
| Volume, min/week               | 40 (0, 120)                     | 30 (0, 105)                          | 60 (0, 180)                      | 1.001***       | 1.001~1.002 |
| <b>Transportation</b>          |                                 |                                      |                                  |                |             |
| <u>MPA<sup>2</sup></u>         |                                 |                                      |                                  |                |             |
| Frequency, d/week              | 5 (1, 7)                        | 5 (1, 7)                             | 5 (2, 7)                         | 1.030*         | 1.003~1.059 |
| Duration, min/d                | 30 (10, 40)                     | 30 (10, 40)                          | 30 (15, 50)                      | 1.002**        | 1.001~1.004 |
| Volume, min/week               | 120 (30, 210)                   | 105 (30, 210)                        | 140 (50, 210)                    | 1.002***       | 1.001~1.003 |
| <b>Sports and leisure-time</b> |                                 |                                      |                                  |                |             |
| <u>VPA<sup>1</sup></u>         |                                 |                                      |                                  |                |             |
| Frequency, d/week              | 0 (0, 1)                        | 0 (0, 1)                             | 0 (0, 2)                         | 1.171***       | 1.116~1.229 |
| Duration, min/d                | 0 (0, 30)                       | 0 (0, 30)                            | 0 (0, 47.5)                      | 1.008***       | 1.006~1.011 |
| Volume, min/week               | 0 (0, 60)                       | 0 (0, 38)                            | 0 (0, 90)                        | 1.002***       | 1.001~1.003 |
| <u>MPA<sup>2</sup></u>         |                                 |                                      |                                  |                |             |
| Frequency, d/week              | 1 (0, 2)                        | 0 (0, 2)                             | 1 (0, 3)                         | 1.125***       | 1.082~1.169 |
| Duration, min/d                | 10 (0, 30)                      | 0 (0, 30)                            | 20 (0, 40)                       | 1.006***       | 1.004~1.008 |
| Volume, min/week               | 15 (0, 80)                      | 0 (0, 75)                            | 40 (0, 90)                       | 1.002***       | 1.001~1.002 |
| <u>MVPA<sup>3</sup></u>        |                                 |                                      |                                  |                |             |
| Volume, min/week               | 45 (0, 130.5)                   | 30 (0, 120)                          | 80 (0, 210)                      | 1.001***       | 1.001~1.002 |
| <b>Total VPA<sup>1</sup></b>   |                                 |                                      |                                  |                |             |
| Volume, min/week               | 0 (0, 100)                      | 0 (0, 80)                            | 40 (0, 180)                      | 1.001***       | 1.001~1.002 |
| <b>Total MPA<sup>2</sup></b>   |                                 |                                      |                                  |                |             |
| Volume, min/week               | 60 (0, 150)                     | 60 (0, 140)                          | 100 (10, 200)                    | 1.001***       | 1.001~1.001 |
| <b>Total MVPA<sup>3</sup></b>  |                                 |                                      |                                  |                |             |
| Volume, min/week               | 255 (120, 490)                  | 235 (105, 450)                       | 340 (180, 630)                   | 1.001***       | 1.000~1.001 |
|                                | <i>n (%)</i>                    | <i>n (%)</i>                         | <i>n (%)</i>                     |                |             |
| <b>Sedentary behaviors</b>     |                                 |                                      |                                  |                |             |
| <4.00 h/d                      | 590 (12.4)                      | 459 (77.8)                           | 131 (22.2)                       | 1 (ref.)       |             |
| 4.00-5.99 h/d                  | 869 (18.3)                      | 664 (76.4)                           | 205 (23.6)                       | 1.119          | 0.859~1.459 |
| 6.00-8.99 h/d                  | 1453 (30.5)                     | 1119 (77.0)                          | 334 (23.0)                       | 0.983          | 0.769~1.258 |

|                       |             |             |            |          |             |
|-----------------------|-------------|-------------|------------|----------|-------------|
| 9.00-11.99 h/d        | 978 (20.6)  | 752 (76.9)  | 226 (23.1) | 0.940    | 0.721~1.225 |
| ≥12.00 h/d            | 868 (18.2)  | 683 (78.7)  | 185 (21.3) | 0.795    | 0.604~1.045 |
| <b>Sleep duration</b> |             |             |            |          |             |
| 7.00-7.99 h/d         | 1882 (39.6) | 1493 (79.3) | 389 (20.7) | 1 (ref.) |             |
| <6.00 h/d             | 287 (6.0)   | 223 (77.7)  | 64 (22.7)  | 1.428*   | 1.032~1.977 |
| 6.00-6.99 h/d         | 969 (20.4)  | 708 (73.0)  | 261 (27.0) | 1.425*** | 1.175~1.729 |
| 8.00-8.99 h/d         | 1186 (24.9) | 916 (77.2)  | 270 (22.8) | 1.131    | 0.939~1.361 |
| ≥9.00 h/d             | 434 (9.1)   | 337 (77.6)  | 97 (22.4)  | 1.020    | 0.782~1.331 |

#:  $P<0.10$ ; \*:  $P<0.05$ ; \*\*:  $P<0.01$ ; \*\*\*:  $P<0.001$ .

<sup>1</sup>: VPA, vigorous-intensity physical activity.

<sup>2</sup>: MPA, moderate-intensity physical activity.

<sup>3</sup>: MVPA, moderate- and vigorous-intensity physical activity.

Adjusted ORs and 95% CIs of each life-style variable were calculated after controlling for the significant socio-demographic variables in Table 1, including city, study year, gender, university/other sports team member, and any chronic disease/symptom.

We finally performed a hierarchical analysis and Table 3 presents the results of its final model. Risk estimations of socio-demographic variables in Block 1 (including city, gender, study year, and chronic disease/symptom) did not change much before and after controlling for life-style variables, whilst those of the two variables of sports team member reduced largely after the adjustment of life-style variables. In addition, frequency and duration of sports and leisure-time VPA, duration of sports and leisure-time MPA, and sleep duration (in Block 2) were significantly related with PARI, with the adjusted ORs slightly decreasing after controlling for socio-demographic variables.

**Table 3 Final model of hierarchical logistic regression to estimate risks of both socio-demographic and life-style variables for PARI among university students in China**

| Characteristics | P-value | Adjusted OR | 95% CI      |
|-----------------|---------|-------------|-------------|
| <b>Block 1</b>  |         |             |             |
| City            |         |             |             |
| Jinan           |         | 1 (ref.)    |             |
| Shantou         | 0.000   | 4.239       | 3.475~5.171 |
| Hong Kong       | 0.468   | 0.913       | 0.713~1.168 |
| Study year      |         |             |             |
| Year 1          | 0.039   | 1.287       | 1.099~1.515 |

|                                                               |       |          |             |
|---------------------------------------------------------------|-------|----------|-------------|
| Year 2                                                        | 0.883 | 1.014    | 0.846~1.215 |
| Year 3                                                        |       | 1 (ref.) |             |
| <b>Gender</b>                                                 |       |          |             |
| Male                                                          | 0.028 | 1.199    | 1.020~1.410 |
| Female                                                        |       | 1 (ref.) |             |
| <b>University sports team member</b>                          |       |          |             |
| No                                                            |       | 1 (ref.) |             |
| Yes                                                           | 0.000 | 2.360    | 1.881~2.961 |
| <b>Other sports team member</b>                               |       |          |             |
| No                                                            |       | 1 (ref.) |             |
| Yes                                                           | 0.000 | 1.717    | 1.309~2.253 |
| <b>Any chronic disease/symptom</b>                            |       |          |             |
| No                                                            |       | 1 (ref.) |             |
| Yes                                                           | 0.013 | 1.548    | 1.096~2.187 |
| <b>Block 2</b>                                                |       |          |             |
| Sports and leisure-time VPA <sup>1</sup> , frequency (d/week) | 0.010 | 1.079    | 1.018~1.144 |
| Sports and leisure-time VPA <sup>1</sup> , duration (min/d)   | 0.000 | 1.006    | 1.003~1.008 |
| Sports and leisure-time MPA <sup>2</sup> , duration (min/d)   | 0.000 | 1.004    | 1.002~1.006 |
| <b>Sleep duration</b>                                         |       |          |             |
| 7.00-7.99 h/d                                                 |       | 1 (ref.) |             |
| <6.00 h/d                                                     | 0.045 | 1.333    | 1.006~1.766 |
| 6.00-6.99 h/d                                                 | 0.014 | 1.262    | 1.048~1.519 |
| 8.00-8.99 h/d                                                 | 0.314 | 1.111    | 0.905~1.365 |
| ≥ 9.00 h/d                                                    | 0.692 | 1.061    | 0.791~1.425 |

<sup>1</sup>: VPA, vigorous-intensity physical activity.

<sup>2</sup>: MPA, moderate-intensity physical activity.

In terms of favorite activities, three fifths of the students (59.7%) reported at least one specific activity that they liked and participated in often in the past 12 months. Common favorite activities reported included running (36.0%), badminton (27.2%), basketball (25.2%), cycling (24.3%), swimming (18.1%), table tennis (15.1%), soccer (14.3%), dance (13.8%) and volleyball (10.1%). Gender difference existed in choosing PA participation, with male students favoring basketball (54.1%) and football (32.2%), whilst females preferring badminton (26.9%) and dance (14.6%).



Table 4 summarizes the numbers and consequences of reported PARI among the 1081 injured participants before and after being stratified by gender. In the past 12 months, around one quarter of the injured (26.4%) experienced PARIs three times or more. More than half of the students reported that they immediately stopped the activity and/or could not participate in the next planned activity (58.5%), or sought medical care (55.0%) after getting injured. Males were inclined to experience multiple PARI episodes ( $\geq$  three injury episodes) and breaks from PA participation than their counterparts.

**Table 4 Numbers and consequences of physical activity-related injury (PARI) among injured university students in China (N=1081)**

| Characteristics                                      | All<br>(N=1081)<br>n (%) | Male<br>(N=367)<br>n (%) | Female<br>(N=714)<br>n (%) | $\chi^2$ | P-value |
|------------------------------------------------------|--------------------------|--------------------------|----------------------------|----------|---------|
| Numbers of PARI episodes                             |                          |                          |                            | 29.837   | <0.001  |
| 1                                                    | 534 (49.4)               | 146 (39.8)               | 388 (54.3)                 |          |         |
| 2                                                    | 262 (24.2)               | 89 (24.3)                | 173 (24.2)                 |          |         |
| $\geq 3$                                             | 285 (26.4)               | 132 (36.0)               | 153 (21.4)                 |          |         |
| <b>Consequences of PARI</b>                          |                          |                          |                            |          |         |
| Stop quickly and/or can't participate in the next PA |                          |                          |                            | 4.084    | 0.044   |
| No                                                   | 449 (41.5)               | 137 (37.3)               | 312 (43.7)                 |          |         |
| Yes                                                  | 632 (58.5)               | 230 (62.7)               | 402 (56.3)                 |          |         |
| Being absent from class                              |                          |                          |                            | 2.416    | 0.120   |
| No                                                   | 778 (72.0)               | 275 (74.9)               | 503 (70.4)                 |          |         |
| Yes                                                  | 303 (28.0)               | 92 (25.1)                | 211 (29.6)                 |          |         |
| Seeking medical attention                            |                          |                          |                            | 0.267    | 0.605   |
| No                                                   | 486 (45.0)               | 169 (46.0)               | 317 (44.4)                 |          |         |
| Yes                                                  | 595 (55.0)               | 198 (54.0)               | 397 (55.6)                 |          |         |

## Discussion

A total of 4758 university students in China completed the online questionnaire

1  
2  
3 survey. PARI experiences in the past 12 months were prevalent among the samples,  
4  
5 with an overall incidence rate of 22.7%. Among the 1081 injured participants, the  
6  
7 majority of the injured experienced a time loss from PA or required medical care due  
8  
9 to the injuries. Multivariate analyses revealed that males, Shantou students, Year 1  
10  
11 students, sports team members, and those with a chronic disease/symptom were more  
12  
13 vulnerable to sustain PARI. PA engagements, no matter at which intensity (MPA, VPA,  
14  
15 or MVPA), in which domain (domestic/work/study, transportation, or sports and  
16  
17 leisure-time), or by which parameter (frequency, duration, or volume), were all  
18  
19 significantly and positively related with PARI. Of them, the frequency of sports and  
20  
21 leisure-time VPA participation was the strongest PA indicator after controlling for  
22  
23 both socio-demographic and life-style variables (adjusted OR: 1.079, 95% CI:  
24  
25 1.018-1.144). Moreover, insufficient sleep was common, and these students tended to  
26  
27 suffer from PARI, especially those with sleep duration less than six hours per day.  
28  
29  
30  
31  
32  
33  
34  
35

36 To our best knowledge, it is the first of this kind of publications to investigate the  
37  
38 epidemic and risk factors of PARI among general university students. In this study,  
39  
40 one out of five participants (22.7%) experienced PARI in the past 12 months,  
41  
42 suggesting that PARI was common among this population. The problem should not be  
43  
44 ignored, especially under the contemporary global campaign to promote PA for the  
45  
46 health for all. Apart from the direct adverse effects on physical health, according to  
47  
48 the earlier reports, PARI can also result in fear or even discontinuity of engaging in  
49  
50 similar activities or movements, and further lead to the reduced PA level.<sup>11 12</sup> Those  
51  
52  
53  
54  
55  
56  
57  
58  
59  
60

1  
2  
3  
4 consequences are against the initial purpose of PA promotion for health. Though we  
5  
6 did not investigate detailed consequences for each PARI episode, our results still  
7  
8 revealed that more than half of the injured experienced PA absenteeism or required  
9  
10 medical attention. There is an urgent call for effective strategies to reduce injuries  
11  
12 when undertaking physical activities. Otherwise, the effectiveness of the global  
13  
14 campaign would be compromised.  
15  
16

17  
18 We found that males were more vulnerable to PARI than females, which is  
19  
20 highly consistent with other research.<sup>20 21</sup> Several reasons may contribute to the  
21  
22 discrepancy: 1) males are more active than females. In our study, male students held  
23  
24 higher values than females for all PA indicators (see supplementary tables S2 and S3),  
25  
26 supporting this possibility; 2) males are more likely to participate in competitive team  
27  
28 sports, such as basketball and football. Most of these sports involve a high rate of  
29  
30 contact, jumping, sprinting and/or pivoting, which are often involved in the  
31  
32 mechanism of injury.<sup>22</sup> The gender difference in favorite activities in this study is in  
33  
34 line with this explanation; 3) even in the same activity, males are also more prone to  
35  
36 experience injuries due to high competitiveness and resistance.<sup>23</sup> Collectively, males  
37  
38 have a greater tendency to experience PARI than females. Future sex-specific  
39  
40 interventions should address the discrepancy.  
41  
42  
43  
44  
45  
46  
47  
48

49 As showed in our study, approximately 70% of the participants were physically  
50  
51 active according to the WHO's recommendations (70.2%), with the prevalence being  
52  
53 higher than those found in other similar studies on Chinese university students (in  
54

1  
2  
3 which PA levels were also self-reported).<sup>24</sup> Increased PA has been reported in several  
4  
5 recent studies as a result of the global PA promotion campaign.<sup>25</sup> In the past decades,  
6  
7 the Chinese government has been making great efforts to promote PA. Our results  
8  
9 may also reflect its positive effect on university students. Nevertheless, individuals  
10  
11 turn to over-reporting their PA levels, as it is a socially desirable behavior.<sup>26</sup> We could  
12  
13 not avoid this possibility, which might have resulted in the over-estimated PA levels of  
14  
15 the participants. However, it may not be reasonable to assume that students with PARI  
16  
17 would be more (or less) likely to over-report their PA than non-PARI ones. Thus, the  
18  
19 estimations of the elevated participation of PA might still be robust.  
20  
21  
22  
23  
24  
25

26 We found that PA involvements were positively and significantly related with  
27  
28 PARI occurrences, with the frequency of sports and leisure-time VPA participation  
29  
30 being the predominant risk factor. Highly consistent results have been found on the  
31  
32 elevated risks of some training characteristics for injuries, including high frequency,  
33  
34 high vigorous intensity, and long duration,<sup>23 27</sup> which should receive sufficient  
35  
36 attentions from researchers and policy-makers when promoting PA among the public.  
37  
38 Unfortunately, neither the WHO's information sheet on recommended PA, which is  
39  
40 most commonly disseminated to the public, nor its full report provides any suggestion  
41  
42 on frequency and duration for safety.<sup>4</sup> It is stated in the full report that  
43  
44 "activity-related adverse events such as musculoskeletal injuries are common but are  
45  
46 usually minor especially for moderate-intensity activities such as walking."<sup>4</sup> However,  
47  
48 PARI may not be as minor as it states if a full consideration was given on both  
49  
50  
51  
52  
53  
54

1  
2  
3 short-term and long-term adverse effects on health.<sup>11 28</sup> For instances, acutely, PARI  
4 counts for the largest proportion of non-fatal injuries, a top health problem among  
5 young adults.<sup>9</sup> Chronically, previous joint injury history, a major type of PARI, was  
6 found to increase the likelihood of osteoarthritis by 2.8- to 6.4-fold.<sup>28</sup> Osteoarthritis is  
7 the most common single cause of disability in the elderly, affecting about 15% of the  
8 entire population.<sup>29</sup> There are several recommendations related to frequency and  
9 duration existing. For example, the American Diabetes Association (ADA) suggests a  
10 frequency of MVPA at least three days per week with a non-exercise interval less than  
11 two consecutive days, and that of resistance exercise at least two times per week on  
12 non-consecutive days.<sup>30</sup> A training frequency of three to five days per week at an  
13 intensity level of 55/65% to 90% of maximum heart rate and a duration of 20-60  
14 minutes of continuous or intermittent of aerobic activity are recommended for  
15 developing and maintaining fitness effects.<sup>31</sup> However, none of them is made for the  
16 safety purpose. Obviously, there is a knowledge gap in safe frequency and duration of  
17 PA (in particular VPA), which warrants further studies. In addition, safety issues  
18 should be emphasized and disseminated to the public along with the  
19 recommendations.  
20  
21  
22  
23  
24  
25  
26  
27  
28  
29  
30  
31  
32  
33  
34  
35  
36  
37  
38  
39  
40  
41  
42  
43  
44

45 In this study, Year 1 students, sports team members, and those with insufficient  
46 sleep duration were more likely to suffer from PARI. Two possibilities might be  
47 attributed to the higher injury risk among Year 1 students: 1) after being released from  
48 heavy academic burdens undertaken in secondary schools and becoming independent  
49  
50  
51  
52  
53  
54

1  
2  
3  
4 from their parents, there might be a sharp increase in PA among them and result in the  
5  
6 elevated risk for injury;<sup>13</sup> 2) they are younger than those in Years 2 and 3. Thus,  
7  
8 adventurousness and impulsiveness inherent in youth, with relatively poor  
9  
10 self-restraint might also play a role.<sup>32 33</sup> Compared to their counterparts, sports team  
11  
12 members in this study had about 2-fold greater possibility to suffer from PARI. This  
13  
14 further proves that we may not simply apply the results observed from collegiate  
15  
16 athletes to the general students. Insufficient sleep duration may increase the risk for  
17  
18 PARI via physical fatigue and impaired cognitive performance, such as cognitive  
19  
20 slowing and decreased vigilance.<sup>34</sup>  
21  
22  
23  
24

25  
26 To our surprise, we found that the PARI incidence rate among Shantou students  
27  
28 was twice as high as that in the other two cities (33.9% vs. 12.3% and 15.0%), which  
29  
30 could not be explained by all variables in this study, including study year, sports team  
31  
32 members, PA indicators, and sleep duration (see supplementary tables S4 and S5). In  
33  
34 addition, incidence rates of the two participating universities in Shantou were also  
35  
36 similarly high (30.1% and 35.4% respectively). Both Shantou and Hong Kong are  
37  
38 located in southern China, sharing with similar climate and its related sports habits,  
39  
40 whilst Jinan is a northern city. Thus, it may be impossible that the large between-city  
41  
42 difference in PARI was attributable to the geographical factors. Though the sports  
43  
44 infrastructure of a university might have potential influences on PARI occurrences  
45  
46 among its students, both Shantou and Jinan belong to Mainland China, where sports  
47  
48 facilities and surveillance system across universities are similar. We therefore ruled  
49  
50  
51  
52  
53  
54

1  
2  
3  
4 out this possibility. In addition, economically, Shantou is the least developed among  
5  
6 the three cities, its less developed urban environments outside universities might have  
7  
8 contributed to its highest PARI incidence rate.<sup>35</sup> Unfortunately, we could not provide  
9  
10 supporting evidence on this hypothesis, as we did not collect detailed information  
11  
12 about places of the PARI occurrences. It is worth further studying on the possible  
13  
14 reasons of the large between-city difference in PARI.  
15  
16

## 17 18 19 **Conclusions**

20  
21 We concluded that PARI was common among university students in China. The  
22  
23 frequency of sports and leisure-time VPA participation was the strongest risk factor  
24  
25 among all PA variables. In addition, males, Shantou students, Year 1 students, sports  
26  
27 team members, and those with insufficient sleep were more vulnerable to PARI.  
28  
29 Further studies, with a prospective study design and adopting both objective and  
30  
31 subjective PA measurements, are warranted to confirm our findings. Nevertheless,  
32  
33 there is an urgent call for actions to prevent university students from PARI, with a full  
34  
35 consideration of the risk factors found in this study. Safety issues should also be  
36  
37 involved and emphasized when promoting PA among the public.  
38  
39  
40  
41  
42  
43

## 44 45 **References**

- 46  
47 1. Janssen I, Leblanc AG. Systematic review of the health benefits of physical activity and  
48  
49 fitness in school-aged children and youth. *International Journal of Behavioral Nutrition*  
50  
51 *and Physical Activity* 2010;**7**(1):1-16.  
52  
53  
54

- 1  
2  
3  
4 2. Penedo FJ, Dahn JR. Exercise and well-being: a review of mental and physical health  
5  
6 benefits associated with physical activity. *Current Opinion in Psychiatry*  
7  
8 2005;**18**(2):189-93.  
9
- 10  
11 3. Garber CE, Blissmer B, Deschenes MR, et al. Quantity and Quality of Exercise for  
12  
13 Developing and Maintaining Cardiorespiratory, Musculoskeletal, and Neuromotor  
14  
15 Fitness in Apparently Healthy Adults: Guidance for Prescribing Exercise. *Medicine*  
16  
17 and Science in Sports and Exercise 2011;**43**(7):1334-59.  
18
- 19  
20 4. World Health Organization. Global Recommendations on Physical Activity for Health 2010.  
21  
22 (Data is available on  
23  
24 [http://apps.who.int/iris/bitstream/10665/44399/1/9789241599979\\_eng.pdf](http://apps.who.int/iris/bitstream/10665/44399/1/9789241599979_eng.pdf)).  
25  
26
- 27  
28 5. Mattila V, Parkkari J, Kannus P, et al. Occurrence and Risk Factors of Unintentional Injuries  
29  
30 among 12- to 18-Year-Old Finns: A Survey of 8219 Adolescents. *European Journal of*  
31  
32 *Epidemiology* 2004;**19**(5):437-44.  
33
- 34  
35 6. Mattila VM, Parkkari J, Koivusilta L, et al. Participation in sports clubs is a strong predictor of  
36  
37 injury hospitalization: a prospective cohort study. *Scandinavian Journal of Medicine &*  
38  
39 *Science in Sports* 2009;**19**(2):267-73.  
40
- 41  
42 7. Verhagen E, Collard D, Paw MCA, et al. A prospective cohort study on physical activity and  
43  
44 sports-related injuries in 10-12-year-old children. *British Journal of Sports Medicine*  
45  
46 2009;**43**(13):1031-35.  
47  
48
- 49  
50 8. Gao Y LY, Duan Y, Lee KL. A pilot study on physical activity related injury (PARI) in primary  
51  
52 school children in Hong Kong. *Inj Med [Internet]* 2015;**5**(1):19-25.  
53  
54



- 1  
2  
3  
4 9. Pickett W, Molcho M, Simpson K, et al. Cross national study of injury and social  
5  
6 determinants in adolescents. *Injury Prevention Journal of the International Society for*  
7  
8 *Child & Adolescent Injury Prevention* 2005;**11**(4):213-8.  
9
- 10  
11 10. Roos EM. Joint injury causes knee osteoarthritis in young adults. *Current Opinion in*  
12  
13 *Rheumatology* 2005;**17**(2):195-200.  
14
- 15  
16 11. Emery C, Tyreman H. Sport participation, sport injury, risk factors and sport safety  
17  
18 practices in Calgary and area junior high schools. *Paediatrics & Child Health*  
19  
20 2009;**14**(7):439-44.  
21
- 22  
23 12. Gignac MA, Cao X, Ramanathan S, et al. Perceived personal importance of exercise and  
24  
25 fears of re-injury: a longitudinal study of psychological factors related to activity after  
26  
27 anterior cruciate ligament reconstruction. *BMC Sports Science, Medicine and*  
28  
29 *Rehabilitation* 2015;**7**(4):1-9.  
30
- 31  
32  
33 13. Hubbard-Turner T, Turner MJ. Physical Activity Levels in College Students With Chronic  
34  
35 Ankle Instability. *J Athl Train* 2015;**50**(7):742-7.  
36
- 37  
38 14. Kerr ZY, Hayden R, Barr M, et al. Epidemiology of National Collegiate Athletic Association  
39  
40 Women's Gymnastics Injuries, 2009-2010 Through 2013-2014. *J Athl Train*  
41  
42 2015;**50**(8):870-8.  
43
- 44  
45 15. Rosa BB, Asperti AM, Helito CP, et al. Epidemiology of sports injuries on collegiate  
46  
47 athletes at a single center. *Acta Ortop Bras* 2014;**22**(6):321-4.  
48
- 49  
50 16. Kulavic K, Hultquist CN, McLester JR. A comparison of motivational factors and barriers to  
51  
52 physical activity among traditional versus nontraditional college students. *J Am Coll*  
53  
54

- 1  
2  
3 Health 2013;**61**(2):60-6.  
4  
5  
6 17. World Health Organization. Chronic diseases and health promotion. Global Physical  
7  
8 Activity Surveillance. (Data is available on  
9  
10 [http://www.who.int/chp/steps/GPAQ\\_CH.pdf?ua=1](http://www.who.int/chp/steps/GPAQ_CH.pdf?ua=1)).  
11  
12  
13 18. Bull FC, Maslin TS, Armstrong T. Global Physical Activity Questionnaire (GPAQ): Nine  
14  
15 Country Reliability and Validity Study. J Phys Act Health 2009;**6**(6):790-804.  
16  
17  
18 19. Claire L Cleland RFH, Frank Kee, Margaret E Cupples, James F Sallis, Mark A Tully  
19  
20 Validity of the Global Physical Activity Questionnaire (GPAQ) in assessing levels and  
21  
22 change in moderate-vigorous physical activity and sedentary behaviour. BMC Public  
23  
24 Health 2014;**14**:1255-65.  
25  
26  
27  
28 20. Gutierrez G, Sills M, Bublitz CD, et al. Sports-related injuries in the United States: who gets  
29  
30 care and who does not. Clinical Journal of Sport Medicine Official Journal of the  
31  
32 Canadian Academy of Sport Medicine 2006;**16**(2):136-41.  
33  
34  
35 21. Gilchrist J, Haileyesus T, Murphy MW, et al. Nonfatal Sports and Recreation Heat Illness  
36  
37 Treated in Hospital Emergency Departments — United States, 2001–2009. Mmwr  
38  
39 Morbidity & Mortality Weekly Report 2011;**60**(29):977-80.  
40  
41  
42  
43 22. Emery CA. Risk factors for injury in child and adolescent sport: a systematic review of the  
44  
45 literature. Clinical Journal of Sport Medicine Official Journal of the Canadian Academy  
46  
47 of Sport Medicine 2003;**13**(4):256-68.  
48  
49  
50 23. Pons-Villanueva J, Segui-Gomez M, Martinez-Gonzalez MA. Risk of injury according to  
51  
52 participation in specific physical activities: a 6-year follow-up of 14 356 participants of  
53  
54

- 1  
2  
3 the SUN cohort. *Int J Epidemiol* 2010;**39**(2):580-7.  
4  
5  
6 24. Abdullah AS, Wong CM, Yam HK, et al. Factors related to non-participation in physical  
7  
8 activity among the students in Hong Kong. *International Journal of Sports Medicine*  
9  
10  
11 2005;**26**(7):611-5.  
12  
13 25. Bloemers F, Collard D, Paw MCA, et al. Physical inactivity is a risk factor for physical  
14  
15 activity-related injuries in children. *Br J Sports Med* 2012;**46**(9):669-74.  
16  
17  
18 26. Taylor CB, Coffey T, Berra K, et al. Seven-day activity and self-report compared to a direct  
19  
20 measure of physical activity. *American Journal of Epidemiology* 1986;**123**(3):818-24.  
21  
22  
23 27. Jones BH, Cowan DN, Tomlinson JP, et al. Epidemiology of injuries associated with  
24  
25 physical training among young men in the army. *Medicine & Science in Sports &*  
26  
27 *Exercise* 1993;**25**(2):197-203.  
28  
29  
30 28. Richmond SA, Fukuchi RK, Ezzat A, et al. Are joint injury, sport activity, physical activity,  
31  
32 obesity, or occupational activities predictors for osteoarthritis? A systematic review. *J*  
33  
34 *Orthop Sports Phys Ther* 2013;**43**(8):515-524..  
35  
36  
37 29. World Health Organization. Chronic diseases and health promotion. Chronic rheumatic  
38  
39 conditions. (Data is available on <http://www.who.int/chp/topics/rheumatic/en/>).  
40  
41  
42 30. M Chimen AK, K Nirantharakumar, T T Pang, R Andrews, P Narendran. What are the  
43  
44 health benefits of physical activity in type 1 diabetes mellitus? A literature review.  
45  
46 *Diabetologia* 2012;**55**:542-51.  
47  
48  
49 31. Pollock ML GG, Butcher JD, et al. The recommended quantity and quality of exercise for  
50  
51 developing and maintaining cardiorespiratory and muscular fitness, and flexibility in  
52  
53  
54

1  
2  
3 healthy adults. Med Sci Sports Exerc 1998;**30**:975-91.  
4

5  
6 32. Russell K, Davison C, King N, et al. Understanding clusters of risk factors across different  
7  
8 environmental and social contexts for the prediction of injuries among Canadian youth.  
9  
10 Injury 2016;**47**(5):1143-50.  
11  
12

13 33. Pickett W, Dostaler S, Craig W, et al. Associations between risk behavior and injury and  
14  
15 the protective roles of social environments: an analysis of 7235 Canadian school  
16  
17 children. Injury Prevention Journal of the International Society for Child & Adolescent  
18  
19 Injury Prevention 2006;**12**(2):87-92.  
20  
21  
22

23 34. Mah CD, Mah KE, Kezirian EJ, et al. The effects of sleep extension on the athletic  
24  
25 performance of collegiate basketball players. Sleep 2011;**34**(7):943-50.  
26  
27

28 35. National Bureau of Statistics of the People's Republic of China. (Data is available on  
29  
30 <http://www.stats.gov.cn/>).  
31  
32

33 **Contributors:** YG, CXJ and LPL conceived and designed the questionnaire. WCC,  
34  
35 LJG, JJW, JHL and HK collected data. YG and WCC performed the statistical  
36  
37 analyses and drafted the manuscript. All authors drafted, edited and approved the final  
38  
39 manuscript.  
40  
41  
42

43  
44 **Data sharing statement:** No additional data sharing available.  
45  
46  
47  
48  
49  
50  
51  
52  
53  
54

**Table S1 Risks of life-style variables for physical activity-related injury (PARI) among university students in China**

| Characteristics                | All<br>(N=4758)<br>mean $\pm$ SD | Non-PARI<br>(N=3677)<br>mean $\pm$ SD | PARI<br>(N=1081)<br>mean $\pm$ SD | Adjusted<br>OR | 95% CI      |
|--------------------------------|----------------------------------|---------------------------------------|-----------------------------------|----------------|-------------|
| <b>Domestic/work/study</b>     |                                  |                                       |                                   |                |             |
| <u>VPA<sup>1</sup></u>         |                                  |                                       |                                   |                |             |
| Frequency, d/week              | 0.76 $\pm$ 1.421                 | 0.70 $\pm$ 1.365                      | 0.99 $\pm$ 1.576                  | 1.168***       | 1.111~1.228 |
| Duration, min/d                | 15.38 $\pm$ 35.438               | 13.69 $\pm$ 31.560                    | 23.14 $\pm$ 45.522                | 1.008***       | 1.006~1.010 |
| Volume, min/week               | 41.50 $\pm$ 110.929              | 35.14 $\pm$ 99.929                    | 63.13 $\pm$ 140.018               | 1.002***       | 1.001~1.002 |
| <u>MPA<sup>2</sup></u>         |                                  |                                       |                                   |                |             |
| Frequency, d/week              | 1.48 $\pm$ 1.849                 | 1.39 $\pm$ 1.818                      | 1.81 $\pm$ 1.917                  | 1.124***       | 1.082~1.167 |
| Duration, min/d                | 23.49 $\pm$ 40.429               | 20.80 $\pm$ 35.704                    | 32.64 $\pm$ 52.486                | 1.005***       | 1.004~1.007 |
| Volume, min/week               | 64.85 $\pm$ 147.661              | 55.46 $\pm$ 120.500                   | 96.80 $\pm$ 212.822               | 1.001***       | 1.001~1.002 |
| <u>MVPA<sup>3</sup></u>        |                                  |                                       |                                   |                |             |
| Volume, min/week               | 106.35 $\pm$ 213.513             | 90.60 $\pm$ 181.366                   | 159.93 $\pm$ 291.752              | 1.001***       | 1.001~1.002 |
| <b>Transportation</b>          |                                  |                                       |                                   |                |             |
| <u>MPA<sup>2</sup></u>         |                                  |                                       |                                   |                |             |
| Frequency, d/week              | 4.06 $\pm$ 2.671                 | 3.98 $\pm$ 2.691                      | 4.33 $\pm$ 2.584                  | 1.030*         | 1.003~1.059 |
| Duration, min/d                | 35.29 $\pm$ 43.228               | 34.08 $\pm$ 39.866                    | 39.42 $\pm$ 52.909                | 1.002**        | 1.001~1.004 |
| Volume, min/week               | 184.92 $\pm$ 279.290             | 176.48 $\pm$ 254.442                  | 213.61 $\pm$ 349.498              | 1.002***       | 1.001~1.003 |
| <b>Sports and leisure-time</b> |                                  |                                       |                                   |                |             |
| <u>VPA<sup>1</sup></u>         |                                  |                                       |                                   |                |             |
| Frequency, d/week              | 0.87 $\pm$ 1.477                 | 0.78 $\pm$ 1.414                      | 1.19 $\pm$ 1.634                  | 1.171***       | 1.116~1.229 |
| Duration, min/d                | 20.09 $\pm$ 36.454               | 17.37 $\pm$ 33.594                    | 29.34 $\pm$ 43.604                | 1.008***       | 1.006~1.011 |
| Volume, min/week               | 49.90 $\pm$ 118.395              | 41.10 $\pm$ 101.766                   | 79.79 $\pm$ 159.167               | 1.002***       | 1.001~1.003 |
| <u>MPA<sup>2</sup></u>         |                                  |                                       |                                   |                |             |
| Frequency, d/week              | 1.39 $\pm$ 1.819                 | 1.30 $\pm$ 1.786                      | 1.73 $\pm$ 1.892                  | 1.125***       | 1.082~1.169 |
| Duration, min/d                | 22.87 $\pm$ 34.299               | 20.90 $\pm$ 32.247                    | 29.58 $\pm$ 39.802                | 1.006***       | 1.004~1.008 |
| Volume, min/week               | 60.48 $\pm$ 118.560              | 53.41 $\pm$ 103.125                   | 84.56 $\pm$ 158.007               | 1.002***       | 1.001~1.002 |
| <u>MVPA<sup>3</sup></u>        |                                  |                                       |                                   |                |             |
| Volume, min/week               | 110.39 $\pm$ 200.961             | 94.52 $\pm$ 172.085                   | 164.35 $\pm$ 270.769              | 1.001***       | 1.001~1.002 |
| <b>Total VPA<sup>1</sup></b>   |                                  |                                       |                                   |                |             |
| Volume, min/week               | 91.40 $\pm$ 198.722              | 76.25 $\pm$ 173.784                   | 142.92 $\pm$ 260.208              | 1.001***       | 1.001~1.002 |
| <b>Total MPA<sup>2</sup></b>   |                                  |                                       |                                   |                |             |
| Volume, min/week               | 310.25 $\pm$ 401.051             | 285.35 $\pm$ 344.310                  | 394.98 $\pm$ 543.731              | 1.001***       | 1.001~1.001 |
| <b>Total MVPA<sup>3</sup></b>  |                                  |                                       |                                   |                |             |
| Volume, min/week               | 401.65 $\pm$ 516.546             | 361.60 $\pm$ 439.591                  | 537.90 $\pm$ 702.472              | 1.001***       | 1.000~1.001 |
|                                | <i>n (%)</i>                     | <i>n (%)</i>                          | <i>n (%)</i>                      |                |             |
| <b>Sedentary behaviors</b>     |                                  |                                       |                                   |                |             |
| <4.00 h/d                      | 590 (12.4)                       | 459 (77.8)                            | 131 (22.2)                        | 1 (ref.)       |             |
| 4.00-5.99 h/d                  | 869 (18.3)                       | 664 (76.4)                            | 205 (23.6)                        | 1.119          | 0.859~1.459 |
| 6.00-8.99 h/d                  | 1453 (30.5)                      | 1119 (77.0)                           | 334 (23.0)                        | 0.983          | 0.769~1.258 |
| 9.00-11.99 h/d                 | 978 (20.6)                       | 752 (76.9)                            | 226 (23.1)                        | 0.940          | 0.721~1.225 |

|                       |             |             |            |          |             |
|-----------------------|-------------|-------------|------------|----------|-------------|
| ≥12.00 h/d            | 868 (18.2)  | 683 (78.7)  | 185 (21.3) | 0.795    | 0.604~1.045 |
| <b>Sleep duration</b> |             |             |            |          |             |
| 7.00-7.99 h/d         | 1882 (39.6) | 1493 (79.3) | 389 (20.7) | 1 (ref.) |             |
| <6.00 h/d             | 287(6.0)    | 223 (77.7)  | 64 (22.7)  | 1.428*   | 1.032~1.977 |
| 6.00-6.99 h/d         | 969 (20.4)  | 708 (73.0)  | 261 (27.0) | 1.425*** | 1.175~1.729 |
| 8.00-8.99 h/d         | 1186 (24.9) | 916 (77.2)  | 270 (22.8) | 1.131    | 0.939~1.361 |
| ≥ 9.00 h/d            | 434 (9.1)   | 337 (77.6)  | 97 (22.4)  | 1.020    | 0.782~1.331 |

#:  $P < 0.10$ ; \*:  $P < 0.05$ ; \*\*:  $P < 0.01$ ; \*\*\*:  $P < 0.001$ .

<sup>1</sup>: VPA, vigorous-intensity physical activity.

<sup>2</sup>: MPA, moderate-intensity physical activity.

<sup>3</sup>: MVPA, moderate- and vigorous-intensity physical activity.

Adjusted ORs and 95% CIs of each life-style variable were calculated after controlling for the significant socio-demographic variables in Table 1, including city, study year, gender, university/other sports team member, and any chronic disease/symptom.

**Table S2 Comparison of all PA indicators between-gender among university students in China (N=4758)**

| Characteristics                | Male           | Female         | Z                  | P-value |
|--------------------------------|----------------|----------------|--------------------|---------|
|                                | (N=1343)       | (N=3415)       |                    |         |
|                                | mean ± SD      | mean ± SD      |                    |         |
| <b>Domestic/work/study</b>     |                |                |                    |         |
| <u>VPA</u> <sup>1</sup>        |                |                |                    |         |
| Frequency, d/week              | 1.19±1.691     | 0.60±1.260     | -13.763            | <0.001  |
| Duration, min/d                | 25.96±43.060   | 11.85±31.061   | -14.181            | <0.001  |
| Volume, min/week               | 72.85±150.714  | 29.17±87.625   | -14.336            | <0.001  |
| <u>MPA</u> <sup>2</sup>        |                |                |                    |         |
| Frequency, d/week              | 1.81±1.897     | 1.36±1.814     | -9.007             | <0.001  |
| Duration, min/d                | 29.63±40.040   | 21.08±40.332   | -10.488            | <0.001  |
| Volume, min/week               | 85.94±166.422  | 56.56±138.744  | -10.352            | <0.001  |
| <u>MVPA</u> <sup>3</sup>       |                |                |                    |         |
| Volume, min/week               | 158.80±267.748 | 85.72±183.939  | -13.226            | <0.001  |
| <b>Transportation</b>          |                |                |                    |         |
| <u>MPA</u> <sup>2</sup>        |                |                |                    |         |
| Frequency, d/week              | 4.30±2.700     | 3.97±2.654     | 3.867 <sup>a</sup> | <0.001  |
| Duration, min/d                | 36.96±45.340   | 34.64±42.358   | -1.571             | 0.116   |
| Volume, min/week               | 201.67±291.588 | 178.33±274.065 | -3.496             | <0.001  |
| <b>Sports and leisure-time</b> |                |                |                    |         |
| <u>VPA</u> <sup>1</sup>        |                |                |                    |         |
| Frequency, d/week              | 1.34±1.698     | 0.69±1.338     | -15.195            | <0.001  |
| Duration, min/d                | 32.05±44.364   | 15.39±31.618   | -15.473            | <0.001  |
| Volume, min/week               | 83.45±153.156  | 36.71±98.458   | -15.846            | <0.001  |
| <u>MPA</u> <sup>2</sup>        |                |                |                    |         |
| Frequency, d/week              | 1.67±1.883     | 1.29±1.782     | -7.851             | <0.001  |

|                               |                |                |         |        |
|-------------------------------|----------------|----------------|---------|--------|
| Duration, min/d               | 28.64±37.019   | 20.61±32.889   | -8.601  | <0.001 |
| Volume, min/week              | 78.74±140.188  | 53.31±108.066  | -8.766  | <0.001 |
| <b>MVPA<sup>3</sup></b>       |                |                |         |        |
| Volume, min/week              | 162.19±257.836 | 190.01±169.320 | -13.808 | <0.001 |
| <b>Total VPA<sup>1</sup></b>  |                |                |         |        |
| Volume, min/week              | 156.30±262.926 | 65.87±159.819  | -17.387 | <0.001 |
| <b>Total MPA<sup>2</sup></b>  |                |                |         |        |
| Volume, min/week              | 366.36±431.825 | 288.19±386.119 | -10.616 | <0.001 |
| <b>Total MVPA<sup>3</sup></b> |                |                |         |        |
| Volume, min/week              | 522.66±608.699 | 354.06±467.024 | -12.527 | <0.001 |

<sup>1</sup>: VPA, vigorous-intensity physical activity.

<sup>2</sup>: MPA, moderate-intensity physical activity.

<sup>3</sup>: MVPA, moderate- and vigorous-intensity physical activity.

<sup>a</sup>: t-value, the between-group difference was tested by *t*-test.

**Table S3 Comparison of all PA indicators between-gender among university students in China (N=4758)**

| Characteristics                | Male<br>(N=1343)<br>median (IQR) | Female<br>(N=3415)<br>median (IQR) | Z                  | P-value |
|--------------------------------|----------------------------------|------------------------------------|--------------------|---------|
| <b>Domestic/work/study</b>     |                                  |                                    |                    |         |
| <b>VPA<sup>1</sup></b>         |                                  |                                    |                    |         |
| Frequency, d/week              | 0 (0, 2)                         | 0 (0, 1)                           | -13.763            | <0.001  |
| Duration, min/d                | 0 (0, 30)                        | 0 (0, 10)                          | -14.181            | <0.001  |
| Volume, min/week               | 0 (0, 90)                        | 0 (0, 10)                          | -14.336            | <0.001  |
| <b>MPA<sup>2</sup></b>         |                                  |                                    |                    |         |
| Frequency, d/week              | 1 (0, 3)                         | 1 (0, 2)                           | -9.007             | <0.001  |
| Duration, min/d                | 20 (0, 40)                       | 10 (0, 30)                         | -10.488            | <0.001  |
| Volume, min/week               | 40 (0, 120)                      | 10 (0, 60)                         | -10.352            | <0.001  |
| <b>MVPA<sup>3</sup></b>        |                                  |                                    |                    |         |
| Volume, min/week               | 60 (0, 180)                      | 20 (0, 90)                         | -13.226            | <0.001  |
| <b>Transportation</b>          |                                  |                                    |                    |         |
| <b>MPA<sup>2</sup></b>         |                                  |                                    |                    |         |
| Frequency, d/week              | 5 (2, 7)                         | 5 (1, 7)                           | 3.867 <sup>a</sup> | <0.001  |
| Duration, min/d                | 30 (12, 50)                      | 30 (10, 40)                        | -1.571             | 0.116   |
| Volume, min/week               | 135 (40, 240)                    | 120 (30, 210)                      | -3.496             | <0.001  |
| <b>Sports and leisure-time</b> |                                  |                                    |                    |         |
| <b>VPA<sup>1</sup></b>         |                                  |                                    |                    |         |
| Frequency, d/week              | 1 (0, 2)                         | 0 (0, 1)                           | -15.195            | <0.001  |
| Duration, min/d                | 15 (0, 60)                       | 0 (0, 20)                          | -15.473            | <0.001  |
| Volume, min/week               | 20 (0, 100)                      | 0 (0, 30)                          | -15.846            | <0.001  |
| <b>MPA<sup>2</sup></b>         |                                  |                                    |                    |         |

|                               |                |                |         |        |
|-------------------------------|----------------|----------------|---------|--------|
| Frequency, d/week             | 1 (0, 3)       | 0 (0, 2)       | -7.851  | <0.001 |
| Duration, min/d               | 20 (0, 40)     | 0 (0, 30)      | -8.601  | <0.001 |
| Volume, min/week              | 40 (0, 100)    | 0 (0, 75)      | -8.766  | <0.001 |
| <b>MVPA<sup>3</sup></b>       |                |                |         |        |
| Volume, min/week              | 90 (0, 210)    | 30 (0, 120)    | -13.808 | <0.001 |
| <b>Total VPA<sup>1</sup></b>  |                |                |         |        |
| Volume, min/week              | 60 (0, 180)    | 0 (0, 60)      | -17.387 | <0.001 |
| <b>Total MPA<sup>2</sup></b>  |                |                |         |        |
| Volume, min/week              | 250 (120, 450) | 180 (80, 340)  | -10.616 | <0.001 |
| <b>Total MVPA<sup>3</sup></b> |                |                |         |        |
| Volume, min/week              | 360 (170, 645) | 230 (105, 420) | -12.527 | <0.001 |

<sup>1</sup>: VPA, vigorous-intensity physical activity.

<sup>2</sup>: MPA, moderate-intensity physical activity.

<sup>3</sup>: MVPA, moderate- and vigorous-intensity physical activity.

<sup>a</sup>: t-value, the between-group difference was tested by *t*-test.

**Table S4 Comparison of all related variables among university students in three Chinese cities (N=4758)**

| Characteristics                | Shantou<br>(N=2123)<br>mean ± SD | Jinan<br>(N=1267)<br>mean ± SD | Hong Kong<br>(N=1368)<br>mean ± SD | $\chi^2$ <sup>b</sup> | P-value |
|--------------------------------|----------------------------------|--------------------------------|------------------------------------|-----------------------|---------|
| <b>Domestic/work/study</b>     |                                  |                                |                                    |                       |         |
| <b>VPA<sup>1</sup></b>         |                                  |                                |                                    |                       |         |
| Frequency, d/week              | 0.49±1.211                       | 0.65±1.360                     | 1.30±1.618                         | 430.847               | <0.001  |
| Duration, min/d                | 9.54±30.385                      | 11.95±26.858                   | 29.20±44.886                       | 459.346               | <0.001  |
| Volume, min/week               | 26.26±97.002                     | 29.63±84.260                   | 76.13±141.237                      | 451.585               | <0.001  |
| <b>MPA<sup>2</sup></b>         |                                  |                                |                                    |                       |         |
| Frequency, d/week              | 1.37±1.794                       | 1.39±1.818                     | 1.35±1.630                         | 41.561                | <0.001  |
| Duration, min/d                | 22.04±46.981                     | 20.96±28.376                   | 28.09±38.545                       | 54.763                | <0.001  |
| Volume, min/week               | 62.81±179.510                    | 65.11±110.745                  | 67.79±120.332                      | 37.396                | <0.001  |
| <b>MVPA<sup>3</sup></b>        |                                  |                                |                                    |                       |         |
| Volume, min/week               | 89.07±233.198                    | 94.75±157.456                  | 143.92±221.951                     | 162.353               | <0.001  |
| <b>Transportation</b>          |                                  |                                |                                    |                       |         |
| <b>MPA<sup>2</sup></b>         |                                  |                                |                                    |                       |         |
| Frequency, d/week              | 4.19±2.677                       | 4.19±2.719                     | 3.75±2.593                         | 13.264 <sup>a</sup>   | <0.001  |
| Duration, min/d                | 33.48±37.862                     | 36.06±36.294                   | 37.40±55.204                       | 12.776                | 0.002   |
| Volume, min/week               | 183.04±243.689                   | 184.01±229.371                 | 188.67±361.267                     | 13.614                | 0.001   |
| <b>Sports and leisure-time</b> |                                  |                                |                                    |                       |         |
| <b>VPA<sup>1</sup></b>         |                                  |                                |                                    |                       |         |
| Frequency, d/week              | 0.66±1.330                       | 0.91±1.590                     | 1.16±1.532                         | 167.345               | <0.001  |
| Duration, min/d                | 13.43±28.847                     | 18.12±30.861                   | 32.26±47.221                       | 215.755               | <0.001  |
| Volume, min/week               | 33.30±90.518                     | 43.20±93.836                   | 81.88±162.518                      | 196.872               | <0.001  |



|                                      |                |                |                |         |        |
|--------------------------------------|----------------|----------------|----------------|---------|--------|
| <b>MPA<sup>2</sup></b>               |                |                |                |         |        |
| Frequency, d/week                    | 1.29±1.789     | 1.73±2.029     | 1.25±1.610     | 53.535  | <0.001 |
| Duration, min/d                      | 19.49±31.618   | 25.21±39.452   | 25.96±39.452   | 48.271  | <0.001 |
| Volume, min/week                     | 53.45±115.262  | 67.89±107.243  | 64.54±132.276  | 52.548  | <0.001 |
| <b>MVPA<sup>3</sup></b>              |                |                |                |         |        |
| Volume, min/week                     | 86.75±170.705  | 111.09±161.263 | 146.42±262.774 | 89.474  | <0.001 |
| <b>Total VPA<sup>1</sup></b>         |                |                |                |         |        |
| Volume, min/week                     | 59.56±164.161  | 72.83±155.848  | 158.01±258.381 | 428.887 | <0.001 |
| <b>Total MPA<sup>2</sup></b>         |                |                |                |         |        |
| Volume, min/week                     | 299.29±378.162 | 317.01±334.969 | 321.00±483.178 | 15.821  | <0.001 |
| <b>Total MVPA<sup>3</sup></b>        |                |                |                |         |        |
| Volume, min/week                     | 358.85±469.466 | 389.84±408.753 | 479.01±650.137 | 41.574  | <0.001 |
|                                      | <i>n (%)</i>   | <i>n (%)</i>   | <i>n (%)</i>   |         |        |
| <b>Study year</b>                    |                |                |                | 147.006 | <0.001 |
| Year 1                               | 698 (32.9)     | 453 (35.8)     | 345 (25.2)     |         |        |
| Year 2                               | 691 (32.5)     | 443 (35.0)     | 328 (24.0)     |         |        |
| Year 3                               | 734 (34.6)     | 371 (29.3)     | 695 (50.8)     |         |        |
| <b>University sports team member</b> |                |                |                | 99.654  | <0.001 |
| No                                   | 1977 (93.1)    | 1153 (91.0)    | 1132 (82.7)    |         |        |
| Yes                                  | 146 (6.9)      | 114 (9.0)      | 236 (17.3)     |         |        |
| <b>Other sports team member</b>      |                |                |                | 0.732   | 0.694  |
| No                                   | 1989 (93.7)    | 1196 (94.4)    | 1287 (94.1)    |         |        |
| Yes                                  | 134 (6.3)      | 71 (5.6)       | 81 (5.9)       |         |        |
| <b>Sleep duration</b>                |                |                |                |         |        |
| 7.00-7.99 h/d                        | 69 (3.3)       | 29 (2.3)       | 189 (13.8)     |         |        |
| <6.00 h/d                            | 406 (19.1)     | 187 (14.8)     | 376 (27.5)     |         |        |
| 6.00-6.99 h/d                        | 841 (39.6)     | 608 (48.0)     | 433 (31.7)     |         |        |
| 8.00-8.99 h/d                        | 563 (26.5)     | 353 (27.9)     | 270 (19.7)     |         |        |
| ≥ 9.00 h/d                           | 244 (11.5)     | 90 (7.1)       | 100 (7.3)      | 338.655 | <0.001 |

<sup>1</sup>: VPA, vigorous-intensity physical activity.

<sup>2</sup>: MPA, moderate-intensity physical activity.

<sup>3</sup>: MVPA, moderate- and vigorous-intensity physical activity.

<sup>a</sup>: *F*-value, tested by one-way ANOVA.

<sup>b</sup>: The between-group differences of study year, university/other sports team member, and sleep duration were tested by Pearson chi-square tests, and 20 PA-related variables were tested by Kruskal-Wallis H tests.

**Table S5 Comparison of all related variables among university students in three Chinese cities (N=4758)**

| Characteristics            | Shantou<br>(N=2123)<br>median (IQR) | Jinan<br>(N=1267)<br>median (IQR) | Hong Kong<br>(N=1368)<br>median (IQR) | $\chi^2$ <sup>b</sup> | <i>P</i> -value |
|----------------------------|-------------------------------------|-----------------------------------|---------------------------------------|-----------------------|-----------------|
| <b>Domestic/work/study</b> |                                     |                                   |                                       |                       |                 |

|    |                                      |                |                |                  |                     |        |
|----|--------------------------------------|----------------|----------------|------------------|---------------------|--------|
| 1  |                                      |                |                |                  |                     |        |
| 2  |                                      |                |                |                  |                     |        |
| 3  |                                      |                |                |                  |                     |        |
| 4  | <u>VPA<sup>1</sup></u>               |                |                |                  |                     |        |
| 5  | Frequency, d/week                    | 0 (0, 0)       | 0 (0, 1)       | 1 (0, 2)         | 430.847             | <0.001 |
| 6  | Duration, min/d                      | 0 (0, 0)       | 0 (0, 10)      | 10 (0, 40)       | 459.346             | <0.001 |
| 7  | Volume, min/week                     | 0 (0, 0)       | 0 (0, 10)      | 15 (0, 90)       | 451.585             | <0.001 |
| 8  |                                      |                |                |                  |                     |        |
| 9  | <u>MPA<sup>2</sup></u>               |                |                |                  |                     |        |
| 10 | Frequency, d/week                    | 1 (0, 2)       | 1 (0, 3)       | 1 (0, 2)         | 41.561              | <0.001 |
| 11 | Duration, min/d                      | 10 (0, 30)     | 15 (0, 30)     | 20 (0, 40)       | 54.763              | <0.001 |
| 12 | Volume, min/week                     | 10 (0, 60)     | 30 (0, 90)     | 30 (0, 90)       | 37.396              | <0.001 |
| 13 |                                      |                |                |                  |                     |        |
| 14 | <u>MVPA<sup>3</sup></u>              |                |                |                  |                     |        |
| 15 | Volume, min/week                     | 20 (0, 80)     | 40 (0, 120)    | 60 (0, 180)      | 162.353             | <0.001 |
| 16 |                                      |                |                |                  |                     |        |
| 17 | <b>Transportation</b>                |                |                |                  |                     |        |
| 18 | <u>MPA<sup>2</sup></u>               |                |                |                  |                     |        |
| 19 | Frequency, d/week                    | 5 (2, 7)       | 5 (2, 7)       | 4 (1, 6)         | 13.264 <sup>a</sup> | <0.001 |
| 20 | Duration, min/d                      | 30 (10, 40)    | 30 (15, 50)    | 30 (10, 40)      | 12.776              | 0.002  |
| 21 | Volume, min/week                     | 140 (40, 210)  | 120 (40, 210)  | 100 (30, 210)    | 13.614              | 0.001  |
| 22 |                                      |                |                |                  |                     |        |
| 23 | <b>Sports and leisure-time</b>       |                |                |                  |                     |        |
| 24 | <u>VPA<sup>1</sup></u>               |                |                |                  |                     |        |
| 25 | Frequency, d/week                    | 0 (0, 1)       | 0 (0, 1)       | 1 (0, 2)         | 167.345             | <0.001 |
| 26 | Duration, min/d                      | 0 (0, 15)      | 0 (0, 30)      | 10 (0, 60)       | 215.755             | <0.001 |
| 27 | Volume, min/week                     | 0 (0, 20)      | 0 (0, 60)      | 10 (0, 90)       | 196.872             | <0.001 |
| 28 |                                      |                |                |                  |                     |        |
| 29 | <u>MPA<sup>2</sup></u>               |                |                |                  |                     |        |
| 30 | Frequency, d/week                    | 0 (0, 2)       | 1 (0, 3)       | 1 (0, 2)         | 53.535              | <0.001 |
| 31 | Duration, min/d                      | 0 (0, 30)      | 20 (0, 30)     | 10 (0, 30)       | 48.271              | <0.001 |
| 32 | Volume, min/week                     | 0 (0, 80)      | 30 (0, 90)     | 15 (0, 78.75)    | 52.548              | <0.001 |
| 33 |                                      |                |                |                  |                     |        |
| 34 | <u>MVPA<sup>3</sup></u>              |                |                |                  |                     |        |
| 35 | Volume, min/week                     | 30 (0, 100)    | 60 (0, 150)    | 60 (0, 180)      | 89.474              | <0.001 |
| 36 |                                      |                |                |                  |                     |        |
| 37 | <b>Total VPA<sup>1</sup></b>         |                |                |                  |                     |        |
| 38 | Volume, min/week                     | 0 (0, 60)      | 0 (0, 90)      | 60 (0, 180)      | 428.887             | <0.001 |
| 39 |                                      |                |                |                  |                     |        |
| 40 | <b>Total MPA<sup>2</sup></b>         |                |                |                  |                     |        |
| 41 | Volume, min/week                     | 200 (90, 360)  | 210 (100, 420) | 190 (80, 375)    | 15.821              | <0.001 |
| 42 |                                      |                |                |                  |                     |        |
| 43 | <b>Total MVPA<sup>3</sup></b>        |                |                |                  |                     |        |
| 44 | Volume, min/week                     | 230 (110, 440) | 270 (125, 500) | 286.5 (120, 570) | 41.574              | <0.001 |
| 45 |                                      | <i>n (%)</i>   | <i>n (%)</i>   | <i>n (%)</i>     |                     |        |
| 46 |                                      |                |                |                  | 147.006             | <0.001 |
| 47 | <b>Study year</b>                    |                |                |                  |                     |        |
| 48 | Year 1                               | 698 (32.9)     | 453 (35.8)     | 345 (25.2)       |                     |        |
| 49 | Year 2                               | 691 (32.5)     | 443 (35.0)     | 328 (24.0)       |                     |        |
| 50 | Year 3                               | 734 (34.6)     | 371 (29.3)     | 695 (50.8)       |                     |        |
| 51 |                                      |                |                |                  |                     |        |
| 52 |                                      |                |                |                  | 99.654              | <0.001 |
| 53 | <b>University sports team member</b> |                |                |                  |                     |        |
| 54 | No                                   | 1977 (93.1)    | 1153 (91.0)    | 1132 (82.7)      |                     |        |
| 55 | Yes                                  | 146 (6.9)      | 114 (9.0)      | 236 (17.3)       |                     |        |
| 56 |                                      |                |                |                  |                     |        |
| 57 | <b>Other sports team member</b>      |                |                |                  | 0.732               | 0.694  |
| 58 | No                                   | 1989 (93.7)    | 1196 (94.4)    | 1287 (94.1)      |                     |        |
| 59 | Yes                                  | 134 (6.3)      | 71 (5.6)       | 81 (5.9)         |                     |        |
| 60 |                                      |                |                |                  |                     |        |

| <b>Sleep duration</b> |            |            |            | 338.655 | <0.001 |
|-----------------------|------------|------------|------------|---------|--------|
| 7.00-7.99 h/d         | 69 (3.3)   | 29 (2.3)   | 189 (13.8) |         |        |
| <6.00 h/d             | 406 (19.1) | 187 (14.8) | 376 (27.5) |         |        |
| 6.00-6.99 h/d         | 841 (39.6) | 608 (48.0) | 433 (31.7) |         |        |
| 8.00-8.99 h/d         | 563 (26.5) | 353 (27.9) | 270 (19.7) |         |        |
| ≥ 9.00 h/d            | 244 (11.5) | 90 (7.1)   | 100 (7.3)  |         |        |

<sup>1</sup>: VPA, vigorous-intensity physical activity.

<sup>2</sup>: MPA, moderate-intensity physical activity.

<sup>3</sup>: MVPA, moderate- and vigorous-intensity physical activity.

<sup>a</sup>: *F*-value, tested by one-way ANOVA.

<sup>b</sup>: The between-group differences of study year, university/other sports team member, and sleep duration were tested by Pearson chi-square tests, and 20 PA-related variables were tested by Kruskal-Wallis H tests.

**STROBE 2007 (v4) Statement—Checklist of items that should be included in reports of *cross-sectional studies***

| Section/Topic                | Item # | Recommendation                                                                                                                                                                       | Reported on page # |
|------------------------------|--------|--------------------------------------------------------------------------------------------------------------------------------------------------------------------------------------|--------------------|
| <b>Title and abstract</b>    | 1      | (a) Indicate the study’s design with a commonly used term in the title or the abstract                                                                                               | 2                  |
|                              |        | (b) Provide in the abstract an informative and balanced summary of what was done and what was found                                                                                  | 2-3                |
| <b>Introduction</b>          |        |                                                                                                                                                                                      |                    |
| Background/rationale         | 2      | Explain the scientific background and rationale for the investigation being reported                                                                                                 | 4-6                |
| Objectives                   | 3      | State specific objectives, including any prespecified hypotheses                                                                                                                     | 6                  |
| <b>Methods</b>               |        |                                                                                                                                                                                      |                    |
| Study design                 | 4      | Present key elements of study design early in the paper                                                                                                                              | 7                  |
| Setting                      | 5      | Describe the setting, locations, and relevant dates, including periods of recruitment, exposure, follow-up, and data collection                                                      | 7-9                |
| Participants                 | 6      | (a) Give the eligibility criteria, and the sources and methods of selection of participants                                                                                          | 7                  |
| Variables                    | 7      | Clearly define all outcomes, exposures, predictors, potential confounders, and effect modifiers. Give diagnostic criteria, if applicable                                             | 7-9                |
| Data sources/<br>measurement | 8*     | For each variable of interest, give sources of data and details of methods of assessment (measurement). Describe comparability of assessment methods if there is more than one group | 7-9                |
| Bias                         | 9      | Describe any efforts to address potential sources of bias                                                                                                                            | None               |
| Study size                   | 10     | Explain how the study size was arrived at                                                                                                                                            | 7                  |
| Quantitative variables       | 11     | Explain how quantitative variables were handled in the analyses. If applicable, describe which groupings were chosen and why                                                         | 9                  |
| Statistical methods          | 12     | (a) Describe all statistical methods, including those used to control for confounding                                                                                                | 10                 |
|                              |        | (b) Describe any methods used to examine subgroups and interactions                                                                                                                  | 10                 |
|                              |        | (c) Explain how missing data were addressed                                                                                                                                          | None               |
|                              |        | (d) If applicable, describe analytical methods taking account of sampling strategy                                                                                                   | None               |
|                              |        | (e) Describe any sensitivity analyses                                                                                                                                                | None               |
| <b>Results</b>               |        |                                                                                                                                                                                      |                    |

|                          |     |                                                                                                                                                                                                              |                      |
|--------------------------|-----|--------------------------------------------------------------------------------------------------------------------------------------------------------------------------------------------------------------|----------------------|
| Participants             | 13* | (a) Report numbers of individuals at each stage of study—eg numbers potentially eligible, examined for eligibility, confirmed eligible, included in the study, completing follow-up, and analysed            | 7                    |
|                          |     | (b) Give reasons for non-participation at each stage                                                                                                                                                         | None                 |
|                          |     | (c) Consider use of a flow diagram                                                                                                                                                                           | None                 |
| Descriptive data         | 14* | (a) Give characteristics of study participants (eg demographic, clinical, social) and information on exposures and potential confounders                                                                     | 11 & 12              |
|                          |     | (b) Indicate number of participants with missing data for each variable of interest                                                                                                                          | None                 |
| Outcome data             | 15* | Report numbers of outcome events or summary measures                                                                                                                                                         | 11, 16 & 17          |
| Main results             | 16  | (a) Give unadjusted estimates and, if applicable, confounder-adjusted estimates and their precision (eg, 95% confidence interval). Make clear which confounders were adjusted for and why they were included | 11-16                |
|                          |     | (b) Report category boundaries when continuous variables were categorized                                                                                                                                    | 13-15                |
|                          |     | (c) If relevant, consider translating estimates of relative risk into absolute risk for a meaningful time period                                                                                             | None                 |
| Other analyses           | 17  | Report other analyses done—eg analyses of subgroups and interactions, and sensitivity analyses                                                                                                               | 16 & 17              |
| <b>Discussion</b>        |     |                                                                                                                                                                                                              |                      |
| Key results              | 18  | Summarise key results with reference to study objectives                                                                                                                                                     | 17 & 18              |
| Limitations              | 19  | Discuss limitations of the study, taking into account sources of potential bias or imprecision. Discuss both direction and magnitude of any potential bias                                                   | 3 & 4 & 19 & 21 & 22 |
| Interpretation           | 20  | Give a cautious overall interpretation of results considering objectives, limitations, multiplicity of analyses, results from similar studies, and other relevant evidence                                   | 23                   |
| Generalisability         | 21  | Discuss the generalisability (external validity) of the study results                                                                                                                                        | None                 |
| <b>Other information</b> |     |                                                                                                                                                                                                              |                      |
| Funding                  | 22  | Give the source of funding and the role of the funders for the present study and, if applicable, for the original study on which the present article is based                                                | 4                    |

\*Give information separately for cases and controls in case-control studies and, if applicable, for exposed and unexposed groups in cohort and cross-sectional studies.

**Note:** An Explanation and Elaboration article discusses each checklist item and gives methodological background and published examples of transparent reporting. The STROBE checklist is best used in conjunction with this article (freely available on the Web sites of PLoS Medicine at <http://www.plosmedicine.org/>, Annals of Internal Medicine at <http://www.annals.org/>, and Epidemiology at <http://www.epidem.com/>). Information on the STROBE Initiative is available at [www.strobe-statement.org](http://www.strobe-statement.org).

# BMJ Open

## Physical activity-related injuries among university students: a multi-center cross-sectional study in China

|                                 |                                                                                                                                                                                                                                                                                                                                                                                                                                                                                                                                                                                                                            |
|---------------------------------|----------------------------------------------------------------------------------------------------------------------------------------------------------------------------------------------------------------------------------------------------------------------------------------------------------------------------------------------------------------------------------------------------------------------------------------------------------------------------------------------------------------------------------------------------------------------------------------------------------------------------|
| Journal:                        | <i>BMJ Open</i>                                                                                                                                                                                                                                                                                                                                                                                                                                                                                                                                                                                                            |
| Manuscript ID                   | bmjopen-2018-021845.R2                                                                                                                                                                                                                                                                                                                                                                                                                                                                                                                                                                                                     |
| Article Type:                   | Research                                                                                                                                                                                                                                                                                                                                                                                                                                                                                                                                                                                                                   |
| Date Submitted by the Author:   | 26-Jun-2018                                                                                                                                                                                                                                                                                                                                                                                                                                                                                                                                                                                                                |
| Complete List of Authors:       | Gao, Yang; Hong Kong Baptist University, Department of Physical Education<br>Cai, Weicong; Shantou University Medical College, Injury Preventive Research Center<br>Gao, Lijie; Shandong University School of Public Health, Department of Epidemiology<br>Wang, Jingjing; China Institute of Sport Science, Mass Sports Research Center<br>Liang, Jiehui; Shantou University Medical College, Injury Preventive Research Center<br>Kwok, Heather ; Hong Kong Baptist University, Department of Physical Education<br>Jia, Cun-Xian; Shandong University School of Public Health, Department of Epidemiology<br>Li, Liping |
| <b>Primary Subject Heading</b>: | Epidemiology                                                                                                                                                                                                                                                                                                                                                                                                                                                                                                                                                                                                               |
| Secondary Subject Heading:      | Epidemiology                                                                                                                                                                                                                                                                                                                                                                                                                                                                                                                                                                                                               |
| Keywords:                       | EPIDEMIOLOGY, PHYSICAL ACTIVITY, SPORTS INJURY, RISK FACTORS, YOUTH                                                                                                                                                                                                                                                                                                                                                                                                                                                                                                                                                        |
|                                 |                                                                                                                                                                                                                                                                                                                                                                                                                                                                                                                                                                                                                            |

SCHOLARONE™  
Manuscripts

1  
2  
3 **Title: Physical activity-related injuries among university students: A**  
4 **multi-center cross-sectional study in China**  
5

6 Running title: Physical activity-related injury among youth  
7  
8  
9

10 Yang Gao<sup>2</sup>, Weicong Cai<sup>1</sup>, Lijie Gao<sup>3</sup>, Jingjing Wang<sup>4</sup>, Jiehui Liang<sup>1</sup>, Heather Kwok<sup>2</sup>,  
11 Cunxian Jia<sup>3</sup>, Liping Li<sup>1\*</sup>  
12

13 <sup>1</sup> Injury Preventive Research Center, Shantou University Medical College, Shantou,  
14 China  
15

16 <sup>2</sup> Department of Physical Education, Hong Kong Baptist University, Hong Kong,  
17 China  
18

19 <sup>3</sup> Department of Epidemiology, Shandong University School of Public Health,  
20 Shandong, China  
21

22 <sup>4</sup> Mass Sports Research Center, China Institute of Sport Science, Beijing, China  
23

24 \* Corresponding author. Liping Li, e-mail: [lppli@stu.edu.cn](mailto:lppli@stu.edu.cn)  
25

26 Injury Preventive Research Center, Shantou University Medical College, No.22  
27 Xinling Road, Shantou 515041, Guangdong, China.  
28

29 Tel: 0086-0754-88900467; Fax: 0086-0754-88550372  
30  
31  
32  
33  
34  
35  
36  
37  
38  
39  
40  
41  
42  
43  
44  
45  
46  
47  
48  
49  
50  
51  
52  
53  
54  
55  
56  
57  
58  
59  
60

## Abstract

**Objectives:** This study aimed to investigate the epidemiologic characteristics and preliminarily explore possible risk factors of physical activity-related injury (PARI) occurrences among Chinese university students via a multi-center mixed survey.

**Design:** Cross-sectional study.

**Participants:** A total of 4758 undergraduates graded 1-3 in nine universities in three Chinese cities were enrolled via cluster random sampling and completed the self-administered online questionnaires during March and April, 2017.

**Main outcome measures:** PARI in the past 12 months.

**Results:** Of the 4758 participants, 1081 sustained PARI in the past 12 months, with an overall PARI incidence rate of 22.7% (27.3% [367/1343] in males and 20.9% [714/3415] in females). Around one quarter of the injured (26.4%) suffered from PARI over at least three episodes. More than half of the injured subjects experienced physical activity (PA) absenteeism and sought medical attention. All PA indicators were significantly and positively associated with PARI, with a frequency of sports and leisure-time vigorous-intensity PA (VPA) participation being the strongest (adjusted OR: 1.079, 95% CI: 1.018-1.144). Moreover, males (OR=1.199), Shantou students (OR=4.239), Year 1 students (OR=1.287), university and other sports team members (OR=1.717-2.360), and those with insufficient sleep time (OR=1.262-1.333) were also at a higher risk of PARI.



1  
2  
3 **Conclusions:** PARI is prevalent among university students in China. The frequency of  
4  
5 sports and leisure-time VPA participation was most strongly associated with PARI  
6  
7 among all PA indicators. These data can inform future programs for  
8  
9 injury-intervention among university students. Safety issues should also be  
10  
11 emphasized when promoting PA among the public to reduce PARI.  
12  
13  
14  
15

## 16 **Article summary**

### 17 **Strengths and limitations of this study**

- 18  
19  
20  
21  
22 1) This is the first study to explore the epidemic and possible risk factors of PARI  
23  
24 among Chinese general university students.  
25  
26  
27  
28 2) The cross-sectional study design limits causal and temporal inferences.  
29  
30  
31 3) All information was self-reported, which may have resulted in recall bias and  
32  
33 reporting bias and therefore somewhat limits our results.  
34  
35  
36 4) We could not investigate activity-specific PARI occurrences because the Global  
37  
38 Physical Activity Questionnaire (GPAQ) does not capture the specific activities  
39  
40 that the participants undertook.  
41  
42  
43

### 44 **Funding statement**

45  
46  
47 This work was supported by the National Natural Science Foundation of China  
48  
49 grant number 31640038.  
50

### 51 **Competing interests**

1  
2  
3  
4 The authors declare that they have no competing interests.  
5

## 6 **Introduction**

7  
8 Physical, social and psychological benefits of engaging in regular physical  
9 activity (PA) have been well documented, including increased cardiorespiratory and  
10 muscular fitness and bone density and reduced risks for non-communicable  
11 diseases.<sup>1-3</sup> Insufficient PA has been recognized as one of the top three risk behaviours  
12 in the development of morbidity and mortality associated with cardiovascular diseases  
13 and other major chronic diseases, such as diabetes and obesity.<sup>4</sup> To achieve and  
14 maintain optimal individual health, the World Health Organization (WHO) has  
15 recommended that adults (18-64 years old) undertake at least 150 minutes of  
16 moderate-intensity PA (MPA) or at least 75 minutes of vigorous-intensity PA (VPA),  
17 or an equivalent combination of moderate- and vigorous-intensity PA (MVPA) every  
18 week.<sup>4</sup> In light of these advantages and recommendations of PA participation, almost  
19 all countries and regions of the world promote PA.  
20  
21  
22  
23  
24  
25  
26  
27  
28  
29  
30  
31  
32  
33  
34  
35  
36  
37

38 Although the promotion of PA is a public health priority, being physically active  
39 can also increase the risk of injury.<sup>5-7</sup> Physical activity-related injury (PARI), also  
40 known as sports and recreational activity-related injury, is any injury resulting from  
41 participation in physical education (PE) class, sports activities, or leisure time PA, e.g.,  
42 sprains, strains, fractures, and contusions.<sup>8</sup> In fact, PARI contributes mostly to all  
43 non-fatal injuries and is the one health threat to relatively healthy adolescents and  
44 young adults in many countries.<sup>4,9</sup> Over the long term, it can also increase the risk of  
45  
46  
47  
48  
49  
50  
51  
52  
53  
54

1  
2  
3 future injuries, osteoarthritis, and other health problems later in life.<sup>10</sup> PARI may also  
4  
5  
6 be a barrier to adopting a more active lifestyle, which may further hinder people from  
7  
8 achieving optimal health.<sup>11 12</sup>  
9

10  
11 Injury incidence is well documented among many active populations. For  
12  
13 example, the injury incidence densities among soccer players were 8.07-8.44/1000  
14  
15 athlete exposures (AE),<sup>13</sup> and tennis players were 4.88-4.89/1000 AE.<sup>14</sup> However,  
16  
17 there are knowledge gaps about the PARI incidence in the general population. To  
18  
19 obtain better understanding on these research questions, we conducted a series of  
20  
21 studies. Prior studies revealed that about 25.1%-32.4% of primary and secondary  
22  
23 school students in two Chinese cities had suffered from PARI in the past 12 months,  
24  
25 suggesting that PARI is prevalent among children and adolescents.<sup>8 15</sup> In China,  
26  
27 students in universities might be more active than those in primary and secondary  
28  
29 schools because they have been released from heavy academic burdens and pressure  
30  
31 for university admission. Moreover, they become independent of their parents and  
32  
33 are therefore more likely to engage in relatively risky activities that their parents  
34  
35 might not allow prior.<sup>16</sup> Thus, university students might be more vulnerable to PARI.  
36  
37  
38  
39  
40  
41  
42  
43

44 While there is ample evidence about PARI among collegiate athletes, it might  
45  
46 not be suitable for general students because of the significant differences in risk  
47  
48 factors between the two groups, such as sports skills, training intensity, competition  
49  
50 level, and cardiorespiratory/muscle fitness.<sup>17 18</sup> We therefore conducted a  
51  
52 multi-center cross-sectional study among a sample of general university students in  
53  
54

1  
2  
3  
4 China, funded by the National Natural Science Foundation of China (Grant No.  
5  
6 31640038), to obtain a better understanding of the PARI epidemic. This paper  
7  
8 presents a baseline survey and reports the epidemiologic characteristics and  
9  
10 preliminary risk factors of PARI among Chinese university students.  
11  
12

## 13 14 **Methods**

### 15 16 17 **Study Participants**

18  
19  
20 The study was conducted at nine universities in Jinan, Shantou, and Hong Kong  
21  
22 (eight comprehensive universities and one normal university). Students at normal  
23  
24 university in China are trained to become teachers in kindergartens and primary and  
25  
26 secondary schools. These cities represent northern, southern, and special regions of  
27  
28 China, respectively. The cluster random sampling method was used to identify 5115  
29  
30 eligible students in Years 1-3. These persons were invited to participate in the study in  
31  
32 March and April, 2017. Seniors (students in Years 4) were excluded because they are  
33  
34 in the transition period to work, and their university lives are significantly different  
35  
36 from the others. In addition, those majoring in PE were further excluded from data  
37  
38 analysis because they differ significantly from the others in terms of PA/sports related  
39  
40 factors. Finally, 4758 students in Years 1-3 completed the online survey, with a  
41  
42 response rate of about 93.0%.  
43  
44  
45  
46  
47  
48  
49

### 50 **Data collection**

51  
52  
53 Qualtrics software (Qualtrics, Provo, UT) was used as the online platform for the  
54

1  
2  
3  
4 baseline questionnaire survey. Participants were enrolled in classes or dormitories.  
5  
6 The online questionnaire was self-administered and consisted of demographics, PA  
7  
8 habits, sedentary behaviours, sleep duration, and PARI experiences in the past 12  
9  
10 months.  
11

12  
13  
14 The demographic variables included university, study major, study year, gender,  
15  
16 age, residence type (dormitory, home, or others), any diagnosed chronic  
17  
18 disease/symptom, and sports team membership.  
19

20  
21  
22 Participants' PA levels in a typical week in the past 12 months were evaluated  
23  
24 using the Global Physical Activity Questionnaire (GPAQ) Chinese version.<sup>19</sup> It is one  
25  
26 of the most commonly used PA questionnaires and has sound reliability and validity  
27  
28 (Spearman's  $\rho=0.81$ ,  $\kappa=0.65$ ).<sup>20 21</sup> The GPAQ collects frequency (days/week)  
29  
30 and duration (cumulative minutes/day) of VPA and MPA in three domains:  
31  
32 domestic/work/study, transportation (MPA only), and sports and leisure-time activities.  
33  
34 The PA volume (cumulative minutes/week) was then calculated by duration multiplied  
35  
36 by frequency for each category of PA (VPA, MPA, and MVPA) in each domain and  
37  
38 overall to generate 20 PA-related variables. The GPAQ does not provide information  
39  
40 on the students' specific activities, and all participants were further asked whether  
41  
42 they had any favourite sports or recreational activities in the past 12 months. Those  
43  
44 with a positive answer were further requested to provide the names of the activities  
45  
46 (no more than three).  
47  
48  
49  
50  
51  
52  
53  
54  
55  
56  
57  
58  
59  
60

1  
2  
3  
4 In terms of sedentary behaviours and sleep, the duration (hours/day) was asked  
5  
6 on both a typical weekday and a typical weekend. The average daily duration in a  
7  
8 week was then calculated and used to group the students into five categories.  
9

10  
11 For this study, a countable PARI must meet at least one of the following three  
12  
13 consequences: 1) the student has to immediately stop the PA and/or cannot participate  
14  
15 in the next planned PA; and/or 2) the student is absent from class the next day; and/or  
16  
17 3) the student needs to seek medical attention (including local first aids but excluding  
18  
19 bandages only).<sup>8</sup> Persons suffering from such a PARI in the past 12 months were  
20  
21 asked to report the number of PARI in each category.  
22  
23  
24  
25

### 26 **Ethics approval**

27  
28  
29 This study was strictly conducted in accordance with the Declaration of Helsinki.  
30  
31 Prior to approaching potential subjects, approval was obtained from Shantou  
32  
33 University Medical College ethics committee, Shandong University ethics committee,  
34  
35 and Hong Kong Baptist University ethics committee. During a plenary session,  
36  
37 explanatory statements and consent forms were distributed to all potential participants,  
38  
39 and the hyperlink or QR code of questionnaire was subsequently given to the  
40  
41 consenting students in the target classes or dormitories. The purpose and meaning of  
42  
43 our study was verbally explained to the subjects prior to their completion of the  
44  
45 questionnaires, and our trained personnel answered any questions that arose during  
46  
47 the session.  
48  
49  
50  
51  
52  
53  
54

## Statistical analysis

Statistical analyses were performed using SPSS version 19.0 (SPSS Inc. Chicago, IL, USA). Continuous data that is normally (i.e., age) or not normally distributed (i.e., 20 PA-related variables) was described using mean (standard deviation, SD) or median (inter-quartile, IQR), respectively; categorical variables were presented as number (percentage). The Pearson chi-square tests were applied to evaluate the numbers and consequences of PARI between females and males—both univariate and multivariate logistic regression were fitted to estimate the risk of each study variable for PARI, where crude and adjusted odds ratios (ORs) and their 95% confidence intervals (95% CIs) were generated, respectively.

Three steps were undertaken in the multivariate analyses. In step one, all socio-demographic variables were selected in both forward and backward manners (likelihood ratio), with a selection criteria of  $\alpha_{in}=0.10$  and  $\alpha_{out}=0.15$ . Adjusted ORs and 95% CIs of the variables remaining in the final model (i.e., significant variables) were calculated and derived from, including city, study year, gender, university/other sports team member, and any chronic disease/symptom. For variables outside of the final model (i.e., insignificant variables, including age and residence type), their adjusted ORs and 95% CIs were obtained after controlling for the significant variables (Table 1). In step two, the risk of each lifestyle variable (including PA habits, sedentary behaviours, and sleep duration) was assessed after controlling for the significant socio-demographic variables in the first step (Table 2). In step three, a

1  
2  
3 hierarchical model was performed to consider all significant study variables together,  
4  
5  
6 with socio-demographic variables selected in the first block and lifestyle variables in  
7  
8 the second (Table 3). A two-sided  $p$ -value less than 0.05 was considered statistically  
9  
10 significant for all tests.  
11

### 12 13 14 **Patient involvement**

15  
16  
17 No patients were involved in the development of the research question or the  
18  
19 outcome measures, nor were they involved in developing plans for design or  
20  
21 implementation of the study. There are no plans to disseminate the results of the  
22  
23 research to study participants.  
24  
25

### 26 27 **Results**

28  
29  
30 Table 1 presents the distribution of the social-demographic characteristics and  
31  
32 their risk estimations for PARI. Overall, the 4758 participants aged from 17 to 25  
33  
34 years old, with a mean age of 20.00 (SD: 1.382). More students were females (71.8%),  
35  
36 living in dormitory (61.1%), and studying in Shantou (44.6%). Few students were  
37  
38 university/other sports team members (10.4%/6.0%) or living with any chronic  
39  
40 condition (3.7%). About 1081 students (22.7%) suffered from at least one PARI in the  
41  
42 past 12 months, with a significantly higher incidence found in both types of sports  
43  
44 team members and those living with chronic conditions (adjusted ORs: 1.561-3.136).  
45  
46 In addition, students in Shantou, males, and those in Years 1 were more likely to  
47  
48 experience PARI than their counterparts (adjusted ORs: 1.397-3.932). Age and  
49  
50  
51  
52  
53  
54



residence type were not significantly associated with PARI.

**Table 1 Risks of socio-demographic characteristics for physical activity-related injury (PARI) among university students in China**

| Characteristics                      | All<br>(N=4758)<br>n (%) | Non-PARI<br>(N=3677)<br>n (%) | PARI<br>(N=1081)<br>n (%) | Adjusted<br>OR       | 95% CI      |
|--------------------------------------|--------------------------|-------------------------------|---------------------------|----------------------|-------------|
| <b>City</b>                          |                          |                               |                           |                      |             |
| Jinan                                | 1267 (26.6)              | 1111 (87.7)                   | 156 (12.3)                | 1 (ref.)             |             |
| Shantou                              | 2123 (44.6)              | 1403 (66.1)                   | 720 (33.9)                | 3.932 <sup>***</sup> | 3.230~4.786 |
| Hong Kong                            | 1368 (28.8)              | 1163 (85.0)                   | 205 (15.0)                | 1.084                | 0.841~1.396 |
| <b>Study year</b>                    |                          |                               |                           |                      |             |
| Year 1                               | 1496 (31.4)              | 1125 (75.2)                   | 371 (24.8)                | 1.397 <sup>**</sup>  | 1.109~1.760 |
| Year 2                               | 1462 (30.7)              | 1121 (76.7)                   | 341 (23.3)                | 1.153                | 0.948~1.401 |
| Year 3                               | 1800 (37.8)              | 1431 (79.5)                   | 369 (20.5)                | 1 (ref.)             |             |
| <b>Gender</b>                        |                          |                               |                           |                      |             |
| Male                                 | 1343 (28.2)              | 976 (72.7)                    | 367 (27.3)                | 1.404 <sup>***</sup> | 1.202~1.640 |
| Female                               | 3415 (71.8)              | 2701 (79.1)                   | 714 (20.9)                | 1 (ref.)             |             |
| <b>Residence type</b>                |                          |                               |                           |                      |             |
| Dormitory                            | 2908 (61.1)              | 2210 (76.0)                   | 698 (24.0)                | 1 (ref.)             |             |
| Home                                 | 1742 (36.6)              | 1377 (79.0)                   | 365 (21.0)                | 1.016                | 0.861~1.198 |
| Others                               | 108 (2.3)                | 90 (83.3)                     | 18 (16.7)                 | 0.820                | 0.469~1.434 |
| <b>University sports team member</b> |                          |                               |                           |                      |             |
| No                                   | 4262 (89.6)              | 3380 (79.3)                   | 882 (20.7)                | 1 (ref.)             |             |
| Yes                                  | 496 (10.4)               | 297 (59.9)                    | 199 (40.1)                | 3.136 <sup>***</sup> | 2.528~3.889 |
| <b>Other sports team member</b>      |                          |                               |                           |                      |             |
| No                                   | 4472 (94.0)              | 3512 (78.5)                   | 960 (21.5)                | 1 (ref.)             |             |
| Yes                                  | 286 (6.0)                | 165 (57.7)                    | 121 (42.3)                | 2.182 <sup>***</sup> | 1.678~2.838 |
| <b>Any chronic disease/symptom</b>   |                          |                               |                           |                      |             |
| No                                   | 4583 (96.3)              | 3563 (77.7)                   | 1020 (22.3)               | 1 (ref.)             |             |
| Yes                                  | 175 (3.7)                | 114 (65.1)                    | 61 (34.9)                 | 1.561 <sup>*</sup>   | 1.111~2.195 |
| Age ( $\bar{x}\pm s$ , years)        | 20.00 $\pm$ 1.382        | 20.01 $\pm$ 1.426             | 19.98 $\pm$ 1.386         | 0.983                | 0.934~1.146 |

\*:  $p < 0.05$ ; \*\*:  $p < 0.01$ ; \*\*\*:  $p < 0.001$ .

Adjusted ORs and 95% CIs of significant variables were calculated after controlling for each other, including city, study year, gender, university/other sports team member, and any chronic disease/symptom. Adjusted ORs and 95% CIs of insignificant variables (age and residence type) were obtained after controlling for the significant variables.

Table 2 shows the distribution of lifestyle variables and their risk assessments for PARI. Most students were engaged in sports and leisure-time PA (87.5%) and transport-related PA (82.1%). Medians and interquartile ranges (IQRs) for total

volumes of VPA, MPA, and MVPA (min/week) were 0 (0, 100), 60 (0, 150), and 255 (120, 490), respectively. The means and SDs for these 20 PA-related variables are available in supplementary table S1. Overall, 70.2% of university students were physically active according to the WHO's recommended PA for adults.<sup>4</sup> All PA indicators were positively and significantly related with PARI (adjusted ORs: 1.001-1.171), with a risk of the frequency of sports and leisure-time VPA participation being the highest. About 26.4% of students slept less than seven hours per day, and they sustained more PARI events (adjusted ORs: 1.425-1.428).

**Table 2 Risks of life-style variables for physical activity-related injury (PARI) among university students in China**

| Characteristics                | All<br>(N=4758)<br>median (IQR) | Non-PARI<br>(N=3677)<br>median (IQR) | PARI<br>(N=1081)<br>median (IQR) | Adjusted<br>OR | 95% CI      |
|--------------------------------|---------------------------------|--------------------------------------|----------------------------------|----------------|-------------|
| <b>Domestic/work/study</b>     |                                 |                                      |                                  |                |             |
| <u>VPA</u> <sup>1</sup>        |                                 |                                      |                                  |                |             |
| Frequency, d/week              | 0 (0, 1)                        | 0 (0, 1)                             | 0 (0, 2)                         | 1.168***       | 1.111~1.228 |
| Duration, min/d                | 0 (0, 20)                       | 0 (0, 15)                            | 0 (0, 30)                        | 1.008***       | 1.006~1.010 |
| Volume, min/week               | 0 (0, 30)                       | 0 (0, 20)                            | 0 (0, 60)                        | 1.002***       | 1.001~1.002 |
| <u>MPA</u> <sup>2</sup>        |                                 |                                      |                                  |                |             |
| Frequency, d/week              | 1 (0, 2)                        | 1 (0, 2)                             | 1 (0, 3)                         | 1.124***       | 1.082~1.167 |
| Duration, min/d                | 10 (0, 30)                      | 10 (0, 30)                           | 20 (0, 30)                       | 1.005***       | 1.004~1.007 |
| Volume, min/week               | 20 (0, 60)                      | 10 (0, 60)                           | 40 (0, 100)                      | 1.001***       | 1.001~1.002 |
| <u>MVPA</u> <sup>3</sup>       |                                 |                                      |                                  |                |             |
| Volume, min/week               | 40 (0, 120)                     | 30 (0, 105)                          | 60 (0, 180)                      | 1.001***       | 1.001~1.002 |
| <b>Transportation</b>          |                                 |                                      |                                  |                |             |
| <u>MPA</u> <sup>2</sup>        |                                 |                                      |                                  |                |             |
| Frequency, d/week              | 5 (1, 7)                        | 5 (1, 7)                             | 5 (2, 7)                         | 1.030*         | 1.003~1.059 |
| Duration, min/d                | 30 (10, 40)                     | 30 (10, 40)                          | 30 (15, 50)                      | 1.002**        | 1.001~1.004 |
| Volume, min/week               | 120 (30, 210)                   | 105 (30, 210)                        | 140 (50, 210)                    | 1.002***       | 1.001~1.003 |
| <b>Sports and leisure-time</b> |                                 |                                      |                                  |                |             |
| <u>VPA</u> <sup>1</sup>        |                                 |                                      |                                  |                |             |
| Frequency, d/week              | 0 (0, 1)                        | 0 (0, 1)                             | 0 (0, 2)                         | 1.171***       | 1.116~1.229 |
| Duration, min/d                | 0 (0, 30)                       | 0 (0, 30)                            | 0 (0, 47.5)                      | 1.008***       | 1.006~1.011 |
| Volume, min/week               | 0 (0, 60)                       | 0 (0, 38)                            | 0 (0, 90)                        | 1.002***       | 1.001~1.003 |

|                               |                |                |                |          |             |  |
|-------------------------------|----------------|----------------|----------------|----------|-------------|--|
| <b>MPA<sup>2</sup></b>        |                |                |                |          |             |  |
| Frequency, d/week             | 1 (0, 2)       | 0 (0, 2)       | 1 (0, 3)       | 1.125*** | 1.082~1.169 |  |
| Duration, min/d               | 10 (0, 30)     | 0 (0, 30)      | 20 (0, 40)     | 1.006*** | 1.004~1.008 |  |
| Volume, min/week              | 15 (0, 80)     | 0 (0, 75)      | 40 (0, 90)     | 1.002*** | 1.001~1.002 |  |
| <b>MVPA<sup>3</sup></b>       |                |                |                |          |             |  |
| Volume, min/week              | 45 (0, 130.5)  | 30 (0, 120)    | 80 (0, 210)    | 1.001*** | 1.001~1.002 |  |
| <b>Total VPA<sup>1</sup></b>  |                |                |                |          |             |  |
| Volume, min/week              | 0 (0, 100)     | 0 (0, 80)      | 40 (0, 180)    | 1.001*** | 1.001~1.002 |  |
| <b>Total MPA<sup>2</sup></b>  |                |                |                |          |             |  |
| Volume, min/week              | 60 (0, 150)    | 60 (0, 140)    | 100 (10, 200)  | 1.001*** | 1.001~1.001 |  |
| <b>Total MVPA<sup>3</sup></b> |                |                |                |          |             |  |
| Volume, min/week              | 255 (120, 490) | 235 (105, 450) | 340 (180, 630) | 1.001*** | 1.000~1.001 |  |
|                               | <i>n (%)</i>   | <i>n (%)</i>   | <i>n (%)</i>   |          |             |  |
| <b>Sedentary behaviors</b>    |                |                |                |          |             |  |
| <4.00 h/d                     | 590 (12.4)     | 459 (77.8)     | 131 (22.2)     | 1 (ref.) |             |  |
| 4.00-5.99 h/d                 | 869 (18.3)     | 664 (76.4)     | 205 (23.6)     | 1.119    | 0.859~1.459 |  |
| 6.00-8.99 h/d                 | 1453 (30.5)    | 1119 (77.0)    | 334 (23.0)     | 0.983    | 0.769~1.258 |  |
| 9.00-11.99 h/d                | 978 (20.6)     | 752 (76.9)     | 226 (23.1)     | 0.940    | 0.721~1.225 |  |
| ≥12.00 h/d                    | 868 (18.2)     | 683 (78.7)     | 185 (21.3)     | 0.795    | 0.604~1.045 |  |
| <b>Sleep duration</b>         |                |                |                |          |             |  |
| 7.00-7.99 h/d                 | 1882 (39.6)    | 1493 (79.3)    | 389 (20.7)     | 1 (ref.) |             |  |
| <6.00 h/d                     | 287 (6.0)      | 223 (77.7)     | 64 (22.7)      | 1.428*   | 1.032~1.977 |  |
| 6.00-6.99 h/d                 | 969 (20.4)     | 708 (73.0)     | 261 (27.0)     | 1.425*** | 1.175~1.729 |  |
| 8.00-8.99 h/d                 | 1186 (24.9)    | 916 (77.2)     | 270 (22.8)     | 1.131    | 0.939~1.361 |  |
| ≥9.00 h/d                     | 434 (9.1)      | 337 (77.6)     | 97 (22.4)      | 1.020    | 0.782~1.331 |  |

\*:  $p < 0.05$ ; \*\*:  $p < 0.01$ ; \*\*\*:  $p < 0.001$ .

<sup>1</sup>: VPA, vigorous-intensity physical activity.

<sup>2</sup>: MPA, moderate-intensity physical activity.

<sup>3</sup>: MVPA, moderate- and vigorous-intensity physical activity.

Adjusted ORs and 95% CIs of each life-style variable were calculated after controlling for the significant socio-demographic variables in Table 1, including city, study year, gender, university/other sports team member, and any chronic disease/symptom.

Finally, we performed a hierarchical analysis, and Table 3 presents the results of its final model. Risk estimations of socio-demographic variables in Block 1 (including city, gender, study year, and chronic disease/symptom) did not change markedly before and after controlling for lifestyle variables. However, the risks of the two sports team membership variables reduced markedly after adjustment for lifestyle variables. In addition, the frequency and duration of sports and leisure-time VPA,

duration of sports and leisure-time MPA, and sleep duration (in Block 2) were significantly related to PARI, with adjusted ORs slightly decreasing after controlling for socio-demographic variables.

**Table 3 Final model of hierarchical logistic regression to estimate risks of both socio-demographic and life-style variables for PARI among university students in China**

| Characteristics                                               | <i>p</i> -value | Adjusted OR | 95% CI      |
|---------------------------------------------------------------|-----------------|-------------|-------------|
| <b>Block 1</b>                                                |                 |             |             |
| City                                                          |                 |             |             |
| Jinan                                                         |                 | 1 (ref.)    |             |
| Shantou                                                       | 0.000           | 4.239       | 3.475~5.171 |
| Hong Kong                                                     | 0.468           | 0.913       | 0.713~1.168 |
| Study year                                                    |                 |             |             |
| Year 1                                                        | 0.039           | 1.287       | 1.099~1.515 |
| Year 2                                                        | 0.883           | 1.014       | 0.846~1.215 |
| Year 3                                                        |                 | 1 (ref.)    |             |
| Gender                                                        |                 |             |             |
| Male                                                          | 0.028           | 1.199       | 1.020~1.410 |
| Female                                                        |                 | 1 (ref.)    |             |
| University sports team member                                 |                 |             |             |
| No                                                            |                 | 1 (ref.)    |             |
| Yes                                                           | 0.000           | 2.360       | 1.881~2.961 |
| Other sports team member                                      |                 |             |             |
| No                                                            |                 | 1 (ref.)    |             |
| Yes                                                           | 0.000           | 1.717       | 1.309~2.253 |
| Any chronic disease/symptom                                   |                 |             |             |
| No                                                            |                 | 1 (ref.)    |             |
| Yes                                                           | 0.013           | 1.548       | 1.096~2.187 |
| <b>Block 2</b>                                                |                 |             |             |
| Sports and leisure-time VPA <sup>1</sup> , frequency (d/week) | 0.010           | 1.079       | 1.018~1.144 |
| Sports and leisure-time VPA <sup>1</sup> , duration (min/d)   | 0.000           | 1.006       | 1.003~1.008 |
| Sports and leisure-time MPA <sup>2</sup> , duration (min/d)   | 0.000           | 1.004       | 1.002~1.006 |
| Sleep duration                                                |                 |             |             |
| 7.00-7.99 h/d                                                 |                 | 1 (ref.)    |             |
| <6.00 h/d                                                     | 0.045           | 1.333       | 1.006~1.766 |
| 6.00-6.99 h/d                                                 | 0.014           | 1.262       | 1.048~1.519 |
| 8.00-8.99 h/d                                                 | 0.314           | 1.111       | 0.905~1.365 |
| ≥ 9.00 h/d                                                    | 0.692           | 1.061       | 0.791~1.425 |

<sup>1</sup>: VPA, vigorous-intensity physical activity.

<sup>2</sup>: MPA, moderate-intensity physical activity.

In terms of favourite activities, three fifths of the students (59.7%) reported at least one specific activity that they often enjoyed in the past 12 months. Common favourite activities included running (36.0%), badminton (27.2%), basketball (25.2%), cycling (24.3%), swimming (18.1%), table tennis (15.1%), soccer (14.3%), dance (13.8%), and volleyball (10.1%). Gender difference existed in choosing PA participation with male students favouring basketball (54.1%) and football (32.2%), and females preferring badminton (26.9%) and dance (14.6%).

Table 4 summarizes the numbers and consequences of reported PARI among the 1081 injured participants before and after being stratified by gender. In the past 12 months, around one quarter of the injured participants (26.4%) experienced PARIs three times or more. More than half of the students reported that they immediately stopped the activity and/or could not participate in the next planned activity (58.5%) or sought medical care (55.0%) after getting injured. Males were inclined to experience multiple PARI episodes ( $\geq$  three injury episodes) and breaks from PA participation than their counterparts.

**Table 4 Numbers and consequences of physical activity-related injury (PARI) among injured university students in China (N=1081)**

| Characteristics                                      | All<br>(N=1081)<br>n (%) | Male<br>(N=367)<br>n (%) | Female<br>(N=714)<br>n (%) | $\chi^2$ | <i>p</i> -value |
|------------------------------------------------------|--------------------------|--------------------------|----------------------------|----------|-----------------|
| Numbers of PARI episodes                             |                          |                          |                            | 29.837   | <0.001          |
| 1                                                    | 534 (49.4)               | 146 (39.8)               | 388 (54.3)                 |          |                 |
| 2                                                    | 262 (24.2)               | 89 (24.3)                | 173 (24.2)                 |          |                 |
| $\geq 3$                                             | 285 (26.4)               | 132 (36.0)               | 153 (21.4)                 |          |                 |
| <b>Consequences of PARI</b>                          |                          |                          |                            |          |                 |
| Stop quickly and/or can't participate in the next PA |                          |                          |                            | 4.084    | 0.044           |

|                           |     |            |            |            |       |       |
|---------------------------|-----|------------|------------|------------|-------|-------|
|                           | No  | 449 (41.5) | 137 (37.3) | 312 (43.7) |       |       |
|                           | Yes | 632 (58.5) | 230 (62.7) | 402 (56.3) |       |       |
| Being absent from class   |     |            |            |            | 2.416 | 0.120 |
|                           | No  | 778 (72.0) | 275 (74.9) | 503 (70.4) |       |       |
|                           | Yes | 303 (28.0) | 92 (25.1)  | 211 (29.6) |       |       |
| Seeking medical attention |     |            |            |            | 0.267 | 0.605 |
|                           | No  | 486 (45.0) | 169 (46.0) | 317 (44.4) |       |       |
|                           | Yes | 595 (55.0) | 198 (54.0) | 397 (55.6) |       |       |

## Discussion

A total of 4758 university students in China completed the online questionnaire. PARI experiences in the past 12 months were prevalent among the samples, with an overall incidence rate of 22.7%. Of the 1081 injured participants, most injured students experienced a time loss from PA or required medical care due to the injuries. Multivariate analyses indicated that males, Shantou students, Year 1 students, sports team members, and those with a chronic disease/symptom were more vulnerable to sustain PARI. PA engagements—regardless of the intensity (MPA, VPA, or MVPA), domain (domestic/work/study, transportation, or sports and leisure-time), or parameter (frequency, duration, or volume) were all significantly and positively related with PARI. The frequency of sports and leisure-time VPA participation was the strongest PA indicator after controlling for both socio-demographic and lifestyle variables (adjusted OR: 1.079, 95% CI: 1.018-1.144). Moreover, insufficient sleep was common, and these students tended to suffer from PARI—especially those with a sleep duration of less than six hours per day.

To the best of our knowledge, this is the first publication to investigate the

1  
2  
3 epidemic and risk factors of PARI among general university students. In this study,  
4  
5 one out of five participants (22.7%) experienced PARI in the past 12 months,  
6  
7 suggesting that PARI was common among this population. The problem should not be  
8  
9 ignored—especially under the contemporary global campaign to promote PA for  
10  
11 health. Other than the direct adverse effects on physical health, PARI can also result in  
12  
13 fear or can even prevent people from exercising, leading to further reduced PA  
14  
15 levels.<sup>11 12</sup> Such a consequence is against the initial purpose of PA promotion for  
16  
17 health. Though we did not investigate detailed consequences for each PARI episode,  
18  
19 our results still revealed that more than half of the injured students experienced PA  
20  
21 absenteeism or required medical attention. There is an urgent need for effective  
22  
23 strategies to reduce injuries when undertaking physical activities. Otherwise, the  
24  
25 effectiveness of the global campaign would be compromised.  
26  
27  
28  
29  
30  
31  
32

33 We found that males were more vulnerable to PARI than females, which is  
34  
35 highly consistent with most previous studies.<sup>22 23</sup> This might be males are more active  
36  
37 than females. In our study, male students had higher values than females for all PA  
38  
39 indicators (see supplementary tables S2 and S3). Also, males are more likely to  
40  
41 participate in competitive team sports, such as basketball and football. Most of these  
42  
43 sports involve a high rate of contact, jumping, sprinting and/or pivoting, which are  
44  
45 often involved in the mechanism of injury.<sup>24</sup> The gender difference in favourite  
46  
47 activities in this study is in line with this explanation. Furthermore, even in the same  
48  
49 activity, males are often more prone to experience injuries due to high  
50  
51  
52  
53  
54  
55  
56  
57  
58  
59  
60

1  
2  
3 competitiveness and resistance than females.<sup>25</sup> Collectively, males have a greater  
4  
5 tendency to experience PARI than females. Future sex-specific interventions should  
6  
7 address the discrepancy.  
8  
9

10  
11 Our study shows that approximately 70% of the participants were physically  
12  
13 active according to the WHO's recommendations (70.2%), with the prevalence being  
14  
15 higher than those found in other similar studies on Chinese university students (in  
16  
17 which PA levels were also self-reported).<sup>26</sup> Increased PA has been reported in several  
18  
19 recent studies as a result of the global PA promotion campaign.<sup>27</sup> In the past decades,  
20  
21 the Chinese government has actively promoted PA. Our results may also reflect its  
22  
23 positive effect on university students. Nevertheless, individuals often over-report their  
24  
25 PA levels because it is a socially desirable behaviour.<sup>28</sup> We could not avoid this  
26  
27 possibility, which might have resulted in over-estimated PA levels of the participants.  
28  
29 However, it may not be reasonable to assume that students with PARI would be more  
30  
31 (or less) likely to over-report their PA than non-PARI ones. Thus, the estimates of the  
32  
33 elevated participation of PA might still be robust.  
34  
35  
36  
37  
38  
39  
40

41 We found that PA involvements were positively and significantly related with  
42  
43 PARI occurrences—the frequency of sports and leisure-time VPA participation was  
44  
45 the predominant factor. Highly consistent results have also been found on the elevated  
46  
47 risks of some training characteristics for injuries, including high frequency, high  
48  
49 vigorous intensity, and long duration.<sup>25 29</sup> These should receive sufficient attentions  
50  
51 from researchers and policy-makers when promoting PA among the public.  
52  
53  
54  
55



1  
2  
3  
4 Unfortunately, the WHO's information sheet on recommended PA (commonly  
5  
6 disseminated to the public) does not provide any suggestion on frequency and  
7  
8 duration for safety (nor does the WHO's full report).<sup>4</sup> The full report does state that  
9  
10 "activity-related adverse events such as musculoskeletal injuries are common but are  
11  
12 usually minor especially for moderate-intensity activities such as walking."<sup>4</sup> However,  
13  
14 PARI may not be minor if we fully considerate both short-term and long-term adverse  
15  
16 effects on health.<sup>11 30</sup> For instance, acute PARI is the largest proportion of non-fatal  
17  
18 injuries, which is a top health problem among young adults.<sup>9</sup> Chronically, joint injury  
19  
20 (a major type of PARI) was found to increase the likelihood of osteoarthritis by 2.8- to  
21  
22 6.4-fold.<sup>30</sup> Osteoarthritis is the most common single cause of disability in the elderly.  
23  
24 It affects about 15% of the entire population.<sup>31</sup>  
25  
26  
27  
28  
29  
30

31 There are several recommendations related to frequency and duration of exercise.  
32  
33 For example, the American Diabetes Association (ADA) suggests a frequency of  
34  
35 MVPA at least three days per week with a non-exercise interval less than two  
36  
37 consecutive days. Resistance exercise is recommended at least twice per week on  
38  
39 non-consecutive days.<sup>32</sup> A training frequency of three to five days per week at an  
40  
41 intensity level of 55/65% to 90% of maximum heart rate and a duration of 20-60  
42  
43 minutes of continuous or intermittent aerobic activity are recommended for  
44  
45 developing and maintaining fitness effects.<sup>33</sup> However, none of these  
46  
47 recommendations are from a safety perspective. Obviously, there is a knowledge gap  
48  
49 in the safe frequency and duration of PA (in particular VPA), which warrants further  
50  
51  
52  
53  
54

1  
2  
3 study. In addition, safety issues should be emphasized and disseminated to the public  
4  
5  
6 along with the recommendations.  
7  
8

9 In this study, Year 1 students, sports team members, and those with insufficient  
10  
11 sleep duration were more likely to suffer from PARI. The higher injury among Year 1  
12  
13 students might be because they do more PA after being released from the heavy  
14  
15 academic burdens undertaken in secondary schools and becoming independent from  
16  
17 their parents.<sup>16</sup> They are younger than those in Years 2 and 3. Thus, the  
18  
19 adventurousness and impulsiveness inherent in youth might also play a role.<sup>34 35</sup>  
20  
21 Compared to their counterparts, sports team members had a 2-fold greater possibility  
22  
23 of suffering from PARI. This further proves that we may not simply apply the results  
24  
25 observed from collegiate athletes to the general students. Insufficient sleep duration  
26  
27 may increase the risk for PARI via physical fatigue and impaired cognitive  
28  
29 performance, such as cognitive slowing and decreased vigilance.<sup>36</sup>  
30  
31  
32  
33  
34  
35

36 To our surprise, we found that the PARI incidence rate among Shantou students  
37  
38 was twice as high as that in the other two cities (33.9% vs. 12.3% and 15.0%), which  
39  
40 could not be explained by all variables in this study, including study year, sports team  
41  
42 members, PA indicators, and sleep duration (see supplementary tables S4 and S5). In  
43  
44 addition, the incidence rates of the two participating universities in Shantou were also  
45  
46 similarly high (30.1% and 35.4% respectively). Both Shantou and Hong Kong are  
47  
48 located in southern China. They have a similar climate and its related sports habits  
49  
50 whilst Jinan is a northern city. Thus, it may be impossible that the large between-city  
51  
52  
53  
54

1  
2  
3  
4 difference in PARI was attributable to the geographical factors. Though the sports  
5  
6 infrastructure of a university might impact PARI among the students, both Shantou  
7  
8 and Jinan belong to Mainland China where sports facilities and surveillance systems  
9  
10 across universities are similar. We therefore ruled out this possibility. Economically,  
11  
12 Shantou is the least developed of the three cities. The less developed urban  
13  
14 environments outside of the universities might have contributed to its higher PARI  
15  
16 incidence rate.<sup>37</sup> Unfortunately, we could not provide supporting evidence for this  
17  
18 hypothesis because we did not collect detailed information about the location of PARI  
19  
20 incidents; however, the possible reasons underlying the large between-city PARI  
21  
22 differences should be studied.  
23  
24  
25  
26  
27

28  
29 Several limitations should be considered. First, the cross-sectional study design  
30  
31 limits causal and temporal inferences in the risk evaluation analyses. For example, it  
32  
33 is plausible that some injured students would rate their PA levels higher if not injured  
34  
35 because their PA levels might have been affected by their injuries—this may have  
36  
37 resulted in an under-estimation of the PA's risk for injuries. It is also plausible that  
38  
39 students who were more often engaged in PA would be more likely to remember their  
40  
41 injuries because the injuries might have a greater impact on these students. This  
42  
43 possibility may have led us to over-estimate the relationship between PA levels and  
44  
45 PARI. PA levels in this study were measured once only, and we could not explain the  
46  
47 rationale that PARI contributes to a PA reduction. Our team is conducting a  
48  
49 prospective cohort study to confirm these findings. Second, all information was  
50  
51  
52  
53  
54

1  
2  
3 self-reported, which may have resulted in recall bias (e.g., some participants may have  
4 forgotten to report minor and earlier injury episodes) and reporting bias (e.g., some  
5 participants may have over-reported their PA levels because it is a socially desirable  
6 behaviour). This limits our results somewhat. Finally, we could not investigate  
7 activity-specific PARI occurrences because the GPAQ does not capture the specific  
8 activities that the participants undertook.  
9  
10  
11  
12  
13  
14  
15  
16  
17

## 18 **Conclusions**

19  
20 We concluded that PARI was common among university students in China. The  
21 frequency of sports and leisure-time VPA participation was most strongly associated  
22 with PARI among all PA variables. In addition, males, Shantou students, Year 1  
23 students, sports team members, and those with insufficient sleep were more  
24 vulnerable to PARI. Further prospective studies that adopt both objective and  
25 subjective PA measurements are warranted to confirm our findings. Nevertheless,  
26 there is an urgent call for actions to prevent university students from PARI with a full  
27 consideration of the possible risk factors involved. Safety issues should also be  
28 involved and emphasized when promoting PA among the public.  
29  
30  
31  
32  
33  
34  
35  
36  
37  
38  
39  
40  
41  
42  
43

## 44 **References**

- 45  
46  
47 1. Janssen I, Leblanc AG. Systematic review of the health benefits of physical activity and  
48 fitness in school-aged children and youth. *International Journal of Behavioral Nutrition*  
49 *and Physical Activity* 2010;**7**(1):1-16.  
50  
51  
52  
53  
54

- 1  
2  
3  
4 2. Penedo FJ, Dahn JR. Exercise and well-being: a review of mental and physical health  
5  
6 benefits associated with physical activity. *Current Opinion in Psychiatry*  
7  
8 2005;**18**(2):189-93.  
9
- 10  
11 3. Garber CE, Blissmer B, Deschenes MR, et al. Quantity and Quality of Exercise for  
12  
13 Developing and Maintaining Cardiorespiratory, Musculoskeletal, and Neuromotor  
14  
15 Fitness in Apparently Healthy Adults: Guidance for Prescribing Exercise. *Medicine*  
16  
17 and Science in Sports and Exercise 2011;**43**(7):1334-59.  
18  
19
- 20  
21 4. World Health Organization. Global Recommendations on Physical Activity for Health 2010.  
22  
23 (Data is available on  
24  
25 [http://apps.who.int/iris/bitstream/10665/44399/1/9789241599979\\_eng.pdf](http://apps.who.int/iris/bitstream/10665/44399/1/9789241599979_eng.pdf)).  
26  
27
- 28  
29 5. Mattila V, Parkkari J, Kannus P, et al. Occurrence and Risk Factors of Unintentional Injuries  
30  
31 among 12- to 18-Year-Old Finns: A Survey of 8219 Adolescents. *European Journal of*  
32  
33 *Epidemiology* 2004;**19**(5):437-44.  
34
- 35  
36 6. Mattila VM, Parkkari J, Koivusilta L, et al. Participation in sports clubs is a strong predictor of  
37  
38 injury hospitalization: a prospective cohort study. *Scandinavian Journal of Medicine &*  
39  
40 *Science in Sports* 2009;**19**(2):267-73.  
41
- 42  
43 7. Verhagen E, Collard D, Paw MCA, et al. A prospective cohort study on physical activity and  
44  
45 sports-related injuries in 10-12-year-old children. *British Journal of Sports Medicine*  
46  
47 2009;**43**(13):1031-35.  
48  
49
- 50  
51 8. Gao Y LY, Duan Y, Lee KL. A pilot study on physical activity related injury (PARI) in primary  
52  
53 school children in Hong Kong. *Inj Med [Internet]* 2015;**5**(1):19-25.  
54

- 1  
2  
3  
4 9. Pickett W, Molcho M, Simpson K, et al. Cross national study of injury and social  
5  
6 determinants in adolescents. *Injury Prevention Journal of the International Society for*  
7  
8 *Child & Adolescent Injury Prevention* 2005;**11**(4):213-8.  
9
- 10  
11 10. Roos EM. Joint injury causes knee osteoarthritis in young adults. *Current Opinion in*  
12  
13 *Rheumatology* 2005;**17**(2):195-200.  
14
- 15  
16 11. Emery C, Tyreman H. Sport participation, sport injury, risk factors and sport safety  
17  
18 practices in Calgary and area junior high schools. *Paediatrics & Child Health*  
19  
20 2009;**14**(7):439-44.  
21  
22
- 23 12. Gignac MA, Cao X, Ramanathan S, et al. Perceived personal importance of exercise and  
24  
25 fears of re-injury: a longitudinal study of psychological factors related to activity after  
26  
27 anterior cruciate ligament reconstruction. *BMC Sports Science, Medicine and*  
28  
29 *Rehabilitation* 2015;**7**(4):1-9.  
30  
31
- 32  
33 13. Roos KG, Wasserman EB, Dalton SL, et al. Epidemiology of 3825 injuries sustained in six  
34  
35 seasons of National Collegiate Athletic Association men's and women's soccer  
36  
37 (2009/2010-2014/2015). *Br J Sports Med* 2017;**51**(13):1029-34.  
38  
39
- 40  
41 14. Lynall RC, Kerr ZY, Djoko A, et al. Epidemiology of National Collegiate Athletic Association  
42  
43 men's and women's tennis injuries, 2009/2010-2014/2015. *Br J Sports Med*  
44  
45 2016;**50**(19):1211-6.  
46  
47
- 48  
49 15. Cai W, Gao Y, Yang W, et al. Physical Activity-Related Injury and Its Associated Factors  
50  
51 among Middle School Students in Southern China. *Int J Environ Res Public Health*  
52  
53 2018;**15**(6):1244-55.  
54  
55

- 1  
2  
3  
4 16. Hubbard-Turner T, Turner MJ. Physical Activity Levels in College Students With Chronic  
5  
6 Ankle Instability. *J Athl Train* 2015;**50**(7):742-7.  
7  
8  
9 17. Kerr ZY, Hayden R, Barr M, et al. Epidemiology of National Collegiate Athletic Association  
10  
11 Women's Gymnastics Injuries, 2009-2010 Through 2013-2014. *J Athl Train*  
12  
13 2015;**50**(8):870-8.  
14  
15  
16 18. Rosa BB, Asperti AM, Helito CP, et al. Epidemiology of sports injuries on collegiate  
17  
18 athletes at a single center. *Acta Ortop Bras* 2014;**22**(6):321-4.  
19  
20  
21 19. World Health Organization. Chronic diseases and health promotion. Global Physical  
22  
23 Activity Surveillance. (Data is available on  
24  
25 [http://www.who.int/chp/steps/GPAQ\\_CH.pdf?ua=1](http://www.who.int/chp/steps/GPAQ_CH.pdf?ua=1)).  
26  
27  
28 20. Bull FC, Maslin TS, Armstrong T. Global Physical Activity Questionnaire (GPAQ): Nine  
29  
30 Country Reliability and Validity Study. *J Phys Act Health* 2009;**6**(6):790-804.  
31  
32  
33 21. Claire L Cleland RFH, Frank Kee, Margaret E Cupples, James F Sallis, Mark A Tully  
34  
35 Validity of the Global Physical Activity Questionnaire (GPAQ) in assessing levels and  
36  
37 change in moderate-vigorous physical activity and sedentary behaviour. *BMC Public*  
38  
39 *Health* 2014;**14**:1255-65.  
40  
41  
42 22. Gutierrez G, Sills M, Bublitz CD, et al. Sports-related injuries in the United States: who gets  
43  
44 care and who does not. *Clinical Journal of Sport Medicine Official Journal of the*  
45  
46 *Canadian Academy of Sport Medicine* 2006;**16**(2):136-41.  
47  
48  
49 23. Gilchrist J, Haileyesus T, Murphy MW, et al. Nonfatal Sports and Recreation Heat Illness  
50  
51 Treated in Hospital Emergency Departments — United States, 2001–2009. *Mmwr*  
52  
53

- Morbidity & Mortality Weekly Report 2011;**60**(29):977-80.
24. Emery CA. Risk factors for injury in child and adolescent sport: a systematic review of the literature. *Clinical Journal of Sport Medicine Official Journal of the Canadian Academy of Sport Medicine* 2003;**13**(4):256-68.
25. Pons-Villanueva J, Segui-Gomez M, Martinez-Gonzalez MA. Risk of injury according to participation in specific physical activities: a 6-year follow-up of 14 356 participants of the SUN cohort. *Int J Epidemiol* 2010;**39**(2):580-7.
26. Abdullah AS, Wong CM, Yam HK, et al. Factors related to non-participation in physical activity among the students in Hong Kong. *International Journal of Sports Medicine* 2005;**26**(7):611-5.
27. Bloemers F, Collard D, Paw MCA, et al. Physical inactivity is a risk factor for physical activity-related injuries in children. *Br J Sports Med* 2012;**46**(9):669-74.
28. Taylor CB, Coffey T, Berra K, et al. Seven-day activity and self-report compared to a direct measure of physical activity. *American Journal of Epidemiology* 1986;**123**(3):818-24.
29. Jones BH, Cowan DN, Tomlinson JP, et al. Epidemiology of injuries associated with physical training among young men in the army. *Medicine & Science in Sports & Exercise* 1993;**25**(2):197-203.
30. Richmond SA, Fukuchi RK, Ezzat A, et al. Are joint injury, sport activity, physical activity, obesity, or occupational activities predictors for osteoarthritis? A systematic review. *J Orthop Sports Phys Ther* 2013;**43**(8):515-B19.
31. World Health Organization. Chronic diseases and health promotion. Chronic rheumatic



conditions. (Data is available on <http://www.who.int/chp/topics/rheumatic/en/>).

32. M Chimen AK, K Nirantharakumar, T T Pang, R Andrews, P Narendran. What are the health benefits of physical activity in type 1 diabetes mellitus? A literature review. *Diabetologia* 2012;**55**:542-51.
33. Pollock ML GG, Butcher JD, et al. The recommended quantity and quality of exercise for developing and maintaining cardiorespiratory and muscular fitness, and flexibility in healthy adults. *Med Sci Sports Exerc* 1998;**30**:975-91.
34. Russell K, Davison C, King N, et al. Understanding clusters of risk factors across different environmental and social contexts for the prediction of injuries among Canadian youth. *Injury* 2016;**47**(5):1143-50.
35. Pickett W, Dostaler S, Craig W, et al. Associations between risk behavior and injury and the protective roles of social environments: an analysis of 7235 Canadian school children. *Injury Prevention Journal of the International Society for Child & Adolescent Injury Prevention* 2006;**12**(2):87-92.
36. Mah CD, Mah KE, Kezirian EJ, et al. The effects of sleep extension on the athletic performance of collegiate basketball players. *Sleep* 2011;**34**(7):943-50.
37. National Bureau of Statistics of the People's Republic of China. (Data is available on <http://www.stats.gov.cn/>).

**Contributors:** YG, CXJ and LPL conceived and designed the questionnaire. WCC, LJG, JJW, JHL and HK collected data. YG and WCC performed the statistical analyses and drafted the manuscript. All authors drafted, edited and approved the final

1  
2  
3 manuscript.  
4  
5

6 **Data sharing statement:** No additional data sharing available.  
7  
8  
9  
10  
11  
12  
13  
14  
15  
16  
17  
18  
19  
20  
21  
22  
23  
24  
25  
26  
27  
28  
29  
30  
31  
32  
33  
34  
35  
36  
37  
38  
39  
40  
41  
42  
43  
44  
45  
46  
47  
48  
49  
50  
51  
52  
53  
54  
55  
56  
57  
58  
59  
60

For peer review only

**Table S1 Risks of life-style variables for physical activity-related injury (PARI) among university students in China**

| Characteristics                | All<br>(N=4758)<br>mean $\pm$ SD | Non-PARI<br>(N=3677)<br>mean $\pm$ SD | PARI<br>(N=1081)<br>mean $\pm$ SD | Adjusted<br>OR | 95% CI      |
|--------------------------------|----------------------------------|---------------------------------------|-----------------------------------|----------------|-------------|
| <b>Domestic/work/study</b>     |                                  |                                       |                                   |                |             |
| <u>VPA<sup>1</sup></u>         |                                  |                                       |                                   |                |             |
| Frequency, d/week              | 0.76 $\pm$ 1.421                 | 0.70 $\pm$ 1.365                      | 0.99 $\pm$ 1.576                  | 1.168***       | 1.111~1.228 |
| Duration, min/d                | 15.38 $\pm$ 35.438               | 13.69 $\pm$ 31.560                    | 23.14 $\pm$ 45.522                | 1.008***       | 1.006~1.010 |
| Volume, min/week               | 41.50 $\pm$ 110.929              | 35.14 $\pm$ 99.929                    | 63.13 $\pm$ 140.018               | 1.002***       | 1.001~1.002 |
| <u>MPA<sup>2</sup></u>         |                                  |                                       |                                   |                |             |
| Frequency, d/week              | 1.48 $\pm$ 1.849                 | 1.39 $\pm$ 1.818                      | 1.81 $\pm$ 1.917                  | 1.124***       | 1.082~1.167 |
| Duration, min/d                | 23.49 $\pm$ 40.429               | 20.80 $\pm$ 35.704                    | 32.64 $\pm$ 52.486                | 1.005***       | 1.004~1.007 |
| Volume, min/week               | 64.85 $\pm$ 147.661              | 55.46 $\pm$ 120.500                   | 96.80 $\pm$ 212.822               | 1.001***       | 1.001~1.002 |
| <u>MVPA<sup>3</sup></u>        |                                  |                                       |                                   |                |             |
| Volume, min/week               | 106.35 $\pm$ 213.513             | 90.60 $\pm$ 181.366                   | 159.93 $\pm$ 291.752              | 1.001***       | 1.001~1.002 |
| <b>Transportation</b>          |                                  |                                       |                                   |                |             |
| <u>MPA<sup>2</sup></u>         |                                  |                                       |                                   |                |             |
| Frequency, d/week              | 4.06 $\pm$ 2.671                 | 3.98 $\pm$ 2.691                      | 4.33 $\pm$ 2.584                  | 1.030*         | 1.003~1.059 |
| Duration, min/d                | 35.29 $\pm$ 43.228               | 34.08 $\pm$ 39.866                    | 39.42 $\pm$ 52.909                | 1.002**        | 1.001~1.004 |
| Volume, min/week               | 184.92 $\pm$ 279.290             | 176.48 $\pm$ 254.442                  | 213.61 $\pm$ 349.498              | 1.002***       | 1.001~1.003 |
| <b>Sports and leisure-time</b> |                                  |                                       |                                   |                |             |
| <u>VPA<sup>1</sup></u>         |                                  |                                       |                                   |                |             |
| Frequency, d/week              | 0.87 $\pm$ 1.477                 | 0.78 $\pm$ 1.414                      | 1.19 $\pm$ 1.634                  | 1.171***       | 1.116~1.229 |
| Duration, min/d                | 20.09 $\pm$ 36.454               | 17.37 $\pm$ 33.594                    | 29.34 $\pm$ 43.604                | 1.008***       | 1.006~1.011 |
| Volume, min/week               | 49.90 $\pm$ 118.395              | 41.10 $\pm$ 101.766                   | 79.79 $\pm$ 159.167               | 1.002***       | 1.001~1.003 |
| <u>MPA<sup>2</sup></u>         |                                  |                                       |                                   |                |             |
| Frequency, d/week              | 1.39 $\pm$ 1.819                 | 1.30 $\pm$ 1.786                      | 1.73 $\pm$ 1.892                  | 1.125***       | 1.082~1.169 |
| Duration, min/d                | 22.87 $\pm$ 34.299               | 20.90 $\pm$ 32.247                    | 29.58 $\pm$ 39.802                | 1.006***       | 1.004~1.008 |
| Volume, min/week               | 60.48 $\pm$ 118.560              | 53.41 $\pm$ 103.125                   | 84.56 $\pm$ 158.007               | 1.002***       | 1.001~1.002 |
| <u>MVPA<sup>3</sup></u>        |                                  |                                       |                                   |                |             |
| Volume, min/week               | 110.39 $\pm$ 200.961             | 94.52 $\pm$ 172.085                   | 164.35 $\pm$ 270.769              | 1.001***       | 1.001~1.002 |
| <b>Total VPA<sup>1</sup></b>   |                                  |                                       |                                   |                |             |
| Volume, min/week               | 91.40 $\pm$ 198.722              | 76.25 $\pm$ 173.784                   | 142.92 $\pm$ 260.208              | 1.001***       | 1.001~1.002 |
| <b>Total MPA<sup>2</sup></b>   |                                  |                                       |                                   |                |             |
| Volume, min/week               | 310.25 $\pm$ 401.051             | 285.35 $\pm$ 344.310                  | 394.98 $\pm$ 543.731              | 1.001***       | 1.001~1.001 |
| <b>Total MVPA<sup>3</sup></b>  |                                  |                                       |                                   |                |             |
| Volume, min/week               | 401.65 $\pm$ 516.546             | 361.60 $\pm$ 439.591                  | 537.90 $\pm$ 702.472              | 1.001***       | 1.000~1.001 |
|                                | <i>n (%)</i>                     | <i>n (%)</i>                          | <i>n (%)</i>                      |                |             |
| <b>Sedentary behaviors</b>     |                                  |                                       |                                   |                |             |
| <4.00 h/d                      | 590 (12.4)                       | 459 (77.8)                            | 131 (22.2)                        | 1 (ref.)       |             |
| 4.00-5.99 h/d                  | 869 (18.3)                       | 664 (76.4)                            | 205 (23.6)                        | 1.119          | 0.859~1.459 |
| 6.00-8.99 h/d                  | 1453 (30.5)                      | 1119 (77.0)                           | 334 (23.0)                        | 0.983          | 0.769~1.258 |
| 9.00-11.99 h/d                 | 978 (20.6)                       | 752 (76.9)                            | 226 (23.1)                        | 0.940          | 0.721~1.225 |

|                       |             |             |            |          |             |
|-----------------------|-------------|-------------|------------|----------|-------------|
| ≥12.00 h/d            | 868 (18.2)  | 683 (78.7)  | 185 (21.3) | 0.795    | 0.604~1.045 |
| <b>Sleep duration</b> |             |             |            |          |             |
| 7.00-7.99 h/d         | 1882 (39.6) | 1493 (79.3) | 389 (20.7) | 1 (ref.) |             |
| <6.00 h/d             | 287(6.0)    | 223 (77.7)  | 64 (22.7)  | 1.428*   | 1.032~1.977 |
| 6.00-6.99 h/d         | 969 (20.4)  | 708 (73.0)  | 261 (27.0) | 1.425*** | 1.175~1.729 |
| 8.00-8.99 h/d         | 1186 (24.9) | 916 (77.2)  | 270 (22.8) | 1.131    | 0.939~1.361 |
| ≥ 9.00 h/d            | 434 (9.1)   | 337 (77.6)  | 97 (22.4)  | 1.020    | 0.782~1.331 |

#:  $P < 0.10$ ; \*:  $P < 0.05$ ; \*\*:  $P < 0.01$ ; \*\*\*:  $P < 0.001$ .

<sup>1</sup>: VPA, vigorous-intensity physical activity.

<sup>2</sup>: MPA, moderate-intensity physical activity.

<sup>3</sup>: MVPA, moderate- and vigorous-intensity physical activity.

Adjusted ORs and 95% CIs of each life-style variable were calculated after controlling for the significant socio-demographic variables in Table 1, including city, study year, gender, university/other sports team member, and any chronic disease/symptom.

**Table S2 Comparison of all PA indicators between-gender among university students in China (N=4758)**

| Characteristics                | Male           | Female         | Z                  | P-value |
|--------------------------------|----------------|----------------|--------------------|---------|
|                                | (N=1343)       | (N=3415)       |                    |         |
|                                | mean ± SD      | mean ± SD      |                    |         |
| <b>Domestic/work/study</b>     |                |                |                    |         |
| <u>VPA<sup>1</sup></u>         |                |                |                    |         |
| Frequency, d/week              | 1.19±1.691     | 0.60±1.260     | -13.763            | <0.001  |
| Duration, min/d                | 25.96±43.060   | 11.85±31.061   | -14.181            | <0.001  |
| Volume, min/week               | 72.85±150.714  | 29.17±87.625   | -14.336            | <0.001  |
| <u>MPA<sup>2</sup></u>         |                |                |                    |         |
| Frequency, d/week              | 1.81±1.897     | 1.36±1.814     | -9.007             | <0.001  |
| Duration, min/d                | 29.63±40.040   | 21.08±40.332   | -10.488            | <0.001  |
| Volume, min/week               | 85.94±166.422  | 56.56±138.744  | -10.352            | <0.001  |
| <u>MVPA<sup>3</sup></u>        |                |                |                    |         |
| Volume, min/week               | 158.80±267.748 | 85.72±183.939  | -13.226            | <0.001  |
| <b>Transportation</b>          |                |                |                    |         |
| <u>MPA<sup>2</sup></u>         |                |                |                    |         |
| Frequency, d/week              | 4.30±2.700     | 3.97±2.654     | 3.867 <sup>a</sup> | <0.001  |
| Duration, min/d                | 36.96±45.340   | 34.64±42.358   | -1.571             | 0.116   |
| Volume, min/week               | 201.67±291.588 | 178.33±274.065 | -3.496             | <0.001  |
| <b>Sports and leisure-time</b> |                |                |                    |         |
| <u>VPA<sup>1</sup></u>         |                |                |                    |         |
| Frequency, d/week              | 1.34±1.698     | 0.69±1.338     | -15.195            | <0.001  |
| Duration, min/d                | 32.05±44.364   | 15.39±31.618   | -15.473            | <0.001  |
| Volume, min/week               | 83.45±153.156  | 36.71±98.458   | -15.846            | <0.001  |
| <u>MPA<sup>2</sup></u>         |                |                |                    |         |
| Frequency, d/week              | 1.67±1.883     | 1.29±1.782     | -7.851             | <0.001  |

|                               |                |                |         |        |
|-------------------------------|----------------|----------------|---------|--------|
| Duration, min/d               | 28.64±37.019   | 20.61±32.889   | -8.601  | <0.001 |
| Volume, min/week              | 78.74±140.188  | 53.31±108.066  | -8.766  | <0.001 |
| <b>MVPA<sup>3</sup></b>       |                |                |         |        |
| Volume, min/week              | 162.19±257.836 | 190.01±169.320 | -13.808 | <0.001 |
| <b>Total VPA<sup>1</sup></b>  |                |                |         |        |
| Volume, min/week              | 156.30±262.926 | 65.87±159.819  | -17.387 | <0.001 |
| <b>Total MPA<sup>2</sup></b>  |                |                |         |        |
| Volume, min/week              | 366.36±431.825 | 288.19±386.119 | -10.616 | <0.001 |
| <b>Total MVPA<sup>3</sup></b> |                |                |         |        |
| Volume, min/week              | 522.66±608.699 | 354.06±467.024 | -12.527 | <0.001 |

<sup>1</sup>: VPA, vigorous-intensity physical activity.

<sup>2</sup>: MPA, moderate-intensity physical activity.

<sup>3</sup>: MVPA, moderate- and vigorous-intensity physical activity.

<sup>a</sup>: t-value, the between-group difference was tested by *t*-test.

**Table S3 Comparison of all PA indicators between-gender among university students in China (N=4758)**

| Characteristics                | Male<br>(N=1343)<br>median (IQR) | Female<br>(N=3415)<br>median (IQR) | Z                  | P-value |
|--------------------------------|----------------------------------|------------------------------------|--------------------|---------|
| <b>Domestic/work/study</b>     |                                  |                                    |                    |         |
| <b>VPA<sup>1</sup></b>         |                                  |                                    |                    |         |
| Frequency, d/week              | 0 (0, 2)                         | 0 (0, 1)                           | -13.763            | <0.001  |
| Duration, min/d                | 0 (0, 30)                        | 0 (0, 10)                          | -14.181            | <0.001  |
| Volume, min/week               | 0 (0, 90)                        | 0 (0, 10)                          | -14.336            | <0.001  |
| <b>MPA<sup>2</sup></b>         |                                  |                                    |                    |         |
| Frequency, d/week              | 1 (0, 3)                         | 1 (0, 2)                           | -9.007             | <0.001  |
| Duration, min/d                | 20 (0, 40)                       | 10 (0, 30)                         | -10.488            | <0.001  |
| Volume, min/week               | 40 (0, 120)                      | 10 (0, 60)                         | -10.352            | <0.001  |
| <b>MVPA<sup>3</sup></b>        |                                  |                                    |                    |         |
| Volume, min/week               | 60 (0, 180)                      | 20 (0, 90)                         | -13.226            | <0.001  |
| <b>Transportation</b>          |                                  |                                    |                    |         |
| <b>MPA<sup>2</sup></b>         |                                  |                                    |                    |         |
| Frequency, d/week              | 5 (2, 7)                         | 5 (1, 7)                           | 3.867 <sup>a</sup> | <0.001  |
| Duration, min/d                | 30 (12, 50)                      | 30 (10, 40)                        | -1.571             | 0.116   |
| Volume, min/week               | 135 (40, 240)                    | 120 (30, 210)                      | -3.496             | <0.001  |
| <b>Sports and leisure-time</b> |                                  |                                    |                    |         |
| <b>VPA<sup>1</sup></b>         |                                  |                                    |                    |         |
| Frequency, d/week              | 1 (0, 2)                         | 0 (0, 1)                           | -15.195            | <0.001  |
| Duration, min/d                | 15 (0, 60)                       | 0 (0, 20)                          | -15.473            | <0.001  |
| Volume, min/week               | 20 (0, 100)                      | 0 (0, 30)                          | -15.846            | <0.001  |
| <b>MPA<sup>2</sup></b>         |                                  |                                    |                    |         |

|                               |                |                |         |        |
|-------------------------------|----------------|----------------|---------|--------|
| Frequency, d/week             | 1 (0, 3)       | 0 (0, 2)       | -7.851  | <0.001 |
| Duration, min/d               | 20 (0, 40)     | 0 (0, 30)      | -8.601  | <0.001 |
| Volume, min/week              | 40 (0, 100)    | 0 (0, 75)      | -8.766  | <0.001 |
| <b>MVPA<sup>3</sup></b>       |                |                |         |        |
| Volume, min/week              | 90 (0, 210)    | 30 (0, 120)    | -13.808 | <0.001 |
| <b>Total VPA<sup>1</sup></b>  |                |                |         |        |
| Volume, min/week              | 60 (0, 180)    | 0 (0, 60)      | -17.387 | <0.001 |
| <b>Total MPA<sup>2</sup></b>  |                |                |         |        |
| Volume, min/week              | 250 (120, 450) | 180 (80, 340)  | -10.616 | <0.001 |
| <b>Total MVPA<sup>3</sup></b> |                |                |         |        |
| Volume, min/week              | 360 (170, 645) | 230 (105, 420) | -12.527 | <0.001 |

<sup>1</sup>: VPA, vigorous-intensity physical activity.

<sup>2</sup>: MPA, moderate-intensity physical activity.

<sup>3</sup>: MVPA, moderate- and vigorous-intensity physical activity.

<sup>a</sup>: t-value, the between-group difference was tested by *t*-test.

**Table S4 Comparison of all related variables among university students in three Chinese cities (N=4758)**

| Characteristics                | Shantou<br>(N=2123)<br>mean ± SD | Jinan<br>(N=1267)<br>mean ± SD | Hong Kong<br>(N=1368)<br>mean ± SD | $\chi^2$ <sup>b</sup> | P-value |
|--------------------------------|----------------------------------|--------------------------------|------------------------------------|-----------------------|---------|
| <b>Domestic/work/study</b>     |                                  |                                |                                    |                       |         |
| <b>VPA<sup>1</sup></b>         |                                  |                                |                                    |                       |         |
| Frequency, d/week              | 0.49±1.211                       | 0.65±1.360                     | 1.30±1.618                         | 430.847               | <0.001  |
| Duration, min/d                | 9.54±30.385                      | 11.95±26.858                   | 29.20±44.886                       | 459.346               | <0.001  |
| Volume, min/week               | 26.26±97.002                     | 29.63±84.260                   | 76.13±141.237                      | 451.585               | <0.001  |
| <b>MPA<sup>2</sup></b>         |                                  |                                |                                    |                       |         |
| Frequency, d/week              | 1.37±1.794                       | 1.39±1.818                     | 1.35±1.630                         | 41.561                | <0.001  |
| Duration, min/d                | 22.04±46.981                     | 20.96±28.376                   | 28.09±38.545                       | 54.763                | <0.001  |
| Volume, min/week               | 62.81±179.510                    | 65.11±110.745                  | 67.79±120.332                      | 37.396                | <0.001  |
| <b>MVPA<sup>3</sup></b>        |                                  |                                |                                    |                       |         |
| Volume, min/week               | 89.07±233.198                    | 94.75±157.456                  | 143.92±221.951                     | 162.353               | <0.001  |
| <b>Transportation</b>          |                                  |                                |                                    |                       |         |
| <b>MPA<sup>2</sup></b>         |                                  |                                |                                    |                       |         |
| Frequency, d/week              | 4.19±2.677                       | 4.19±2.719                     | 3.75±2.593                         | 13.264 <sup>a</sup>   | <0.001  |
| Duration, min/d                | 33.48±37.862                     | 36.06±36.294                   | 37.40±55.204                       | 12.776                | 0.002   |
| Volume, min/week               | 183.04±243.689                   | 184.01±229.371                 | 188.67±361.267                     | 13.614                | 0.001   |
| <b>Sports and leisure-time</b> |                                  |                                |                                    |                       |         |
| <b>VPA<sup>1</sup></b>         |                                  |                                |                                    |                       |         |
| Frequency, d/week              | 0.66±1.330                       | 0.91±1.590                     | 1.16±1.532                         | 167.345               | <0.001  |
| Duration, min/d                | 13.43±28.847                     | 18.12±30.861                   | 32.26±47.221                       | 215.755               | <0.001  |
| Volume, min/week               | 33.30±90.518                     | 43.20±93.836                   | 81.88±162.518                      | 196.872               | <0.001  |

|                                      |                |                |                |         |        |
|--------------------------------------|----------------|----------------|----------------|---------|--------|
| <b>MPA<sup>2</sup></b>               |                |                |                |         |        |
| Frequency, d/week                    | 1.29±1.789     | 1.73±2.029     | 1.25±1.610     | 53.535  | <0.001 |
| Duration, min/d                      | 19.49±31.618   | 25.21±39.452   | 25.96±39.452   | 48.271  | <0.001 |
| Volume, min/week                     | 53.45±115.262  | 67.89±107.243  | 64.54±132.276  | 52.548  | <0.001 |
| <b>MVPA<sup>3</sup></b>              |                |                |                |         |        |
| Volume, min/week                     | 86.75±170.705  | 111.09±161.263 | 146.42±262.774 | 89.474  | <0.001 |
| <b>Total VPA<sup>1</sup></b>         |                |                |                |         |        |
| Volume, min/week                     | 59.56±164.161  | 72.83±155.848  | 158.01±258.381 | 428.887 | <0.001 |
| <b>Total MPA<sup>2</sup></b>         |                |                |                |         |        |
| Volume, min/week                     | 299.29±378.162 | 317.01±334.969 | 321.00±483.178 | 15.821  | <0.001 |
| <b>Total MVPA<sup>3</sup></b>        |                |                |                |         |        |
| Volume, min/week                     | 358.85±469.466 | 389.84±408.753 | 479.01±650.137 | 41.574  | <0.001 |
|                                      | <i>n (%)</i>   | <i>n (%)</i>   | <i>n (%)</i>   |         |        |
| <b>Study year</b>                    |                |                |                | 147.006 | <0.001 |
| Year 1                               | 698 (32.9)     | 453 (35.8)     | 345 (25.2)     |         |        |
| Year 2                               | 691 (32.5)     | 443 (35.0)     | 328 (24.0)     |         |        |
| Year 3                               | 734 (34.6)     | 371 (29.3)     | 695 (50.8)     |         |        |
| <b>University sports team member</b> |                |                |                | 99.654  | <0.001 |
| No                                   | 1977 (93.1)    | 1153 (91.0)    | 1132 (82.7)    |         |        |
| Yes                                  | 146 (6.9)      | 114 (9.0)      | 236 (17.3)     |         |        |
| <b>Other sports team member</b>      |                |                |                | 0.732   | 0.694  |
| No                                   | 1989 (93.7)    | 1196 (94.4)    | 1287 (94.1)    |         |        |
| Yes                                  | 134 (6.3)      | 71 (5.6)       | 81 (5.9)       |         |        |
| <b>Sleep duration</b>                |                |                |                |         |        |
| 7.00-7.99 h/d                        | 69 (3.3)       | 29 (2.3)       | 189 (13.8)     | 338.655 | <0.001 |
| <6.00 h/d                            | 406 (19.1)     | 187 (14.8)     | 376 (27.5)     |         |        |
| 6.00-6.99 h/d                        | 841 (39.6)     | 608 (48.0)     | 433 (31.7)     |         |        |
| 8.00-8.99 h/d                        | 563 (26.5)     | 353 (27.9)     | 270 (19.7)     |         |        |
| ≥ 9.00 h/d                           | 244 (11.5)     | 90 (7.1)       | 100 (7.3)      |         |        |

<sup>1</sup>: VPA, vigorous-intensity physical activity.

<sup>2</sup>: MPA, moderate-intensity physical activity.

<sup>3</sup>: MVPA, moderate- and vigorous-intensity physical activity.

<sup>a</sup>: *F*-value, tested by one-way ANOVA.

<sup>b</sup>: The between-group differences of study year, university/other sports team member, and sleep duration were tested by Pearson chi-square tests, and 20 PA-related variables were tested by Kruskal-Wallis H tests.

**Table S5 Comparison of all related variables among university students in three Chinese cities (N=4758)**

| Characteristics            | Shantou<br>(N=2123)<br>median (IQR) | Jinan<br>(N=1267)<br>median (IQR) | Hong Kong<br>(N=1368)<br>median (IQR) | $\chi^2$ <sup>b</sup> | <i>P</i> -value |
|----------------------------|-------------------------------------|-----------------------------------|---------------------------------------|-----------------------|-----------------|
| <b>Domestic/work/study</b> |                                     |                                   |                                       |                       |                 |

|                                      |                |                |                  |                     |        |
|--------------------------------------|----------------|----------------|------------------|---------------------|--------|
| <b>VPA<sup>1</sup></b>               |                |                |                  |                     |        |
| Frequency, d/week                    | 0 (0, 0)       | 0 (0, 1)       | 1 (0, 2)         | 430.847             | <0.001 |
| Duration, min/d                      | 0 (0, 0)       | 0 (0, 10)      | 10 (0, 40)       | 459.346             | <0.001 |
| Volume, min/week                     | 0 (0, 0)       | 0 (0, 10)      | 15 (0, 90)       | 451.585             | <0.001 |
| <b>MPA<sup>2</sup></b>               |                |                |                  |                     |        |
| Frequency, d/week                    | 1 (0, 2)       | 1 (0, 3)       | 1 (0, 2)         | 41.561              | <0.001 |
| Duration, min/d                      | 10 (0, 30)     | 15 (0, 30)     | 20 (0, 40)       | 54.763              | <0.001 |
| Volume, min/week                     | 10 (0, 60)     | 30 (0, 90)     | 30 (0, 90)       | 37.396              | <0.001 |
| <b>MVPA<sup>3</sup></b>              |                |                |                  |                     |        |
| Volume, min/week                     | 20 (0, 80)     | 40 (0, 120)    | 60 (0, 180)      | 162.353             | <0.001 |
| <b>Transportation</b>                |                |                |                  |                     |        |
| <b>MPA<sup>2</sup></b>               |                |                |                  |                     |        |
| Frequency, d/week                    | 5 (2, 7)       | 5 (2, 7)       | 4 (1, 6)         | 13.264 <sup>a</sup> | <0.001 |
| Duration, min/d                      | 30 (10, 40)    | 30 (15, 50)    | 30 (10, 40)      | 12.776              | 0.002  |
| Volume, min/week                     | 140 (40, 210)  | 120 (40, 210)  | 100 (30, 210)    | 13.614              | 0.001  |
| <b>Sports and leisure-time</b>       |                |                |                  |                     |        |
| <b>VPA<sup>1</sup></b>               |                |                |                  |                     |        |
| Frequency, d/week                    | 0 (0, 1)       | 0 (0, 1)       | 1 (0, 2)         | 167.345             | <0.001 |
| Duration, min/d                      | 0 (0, 15)      | 0 (0, 30)      | 10 (0, 60)       | 215.755             | <0.001 |
| Volume, min/week                     | 0 (0, 20)      | 0 (0, 60)      | 10 (0, 90)       | 196.872             | <0.001 |
| <b>MPA<sup>2</sup></b>               |                |                |                  |                     |        |
| Frequency, d/week                    | 0 (0, 2)       | 1 (0, 3)       | 1 (0, 2)         | 53.535              | <0.001 |
| Duration, min/d                      | 0 (0, 30)      | 20 (0, 30)     | 10 (0, 30)       | 48.271              | <0.001 |
| Volume, min/week                     | 0 (0, 80)      | 30 (0, 90)     | 15 (0, 78.75)    | 52.548              | <0.001 |
| <b>MVPA<sup>3</sup></b>              |                |                |                  |                     |        |
| Volume, min/week                     | 30 (0, 100)    | 60 (0, 150)    | 60 (0, 180)      | 89.474              | <0.001 |
| <b>Total VPA<sup>1</sup></b>         |                |                |                  |                     |        |
| Volume, min/week                     | 0 (0, 60)      | 0 (0, 90)      | 60 (0, 180)      | 428.887             | <0.001 |
| <b>Total MPA<sup>2</sup></b>         |                |                |                  |                     |        |
| Volume, min/week                     | 200 (90, 360)  | 210 (100, 420) | 190 (80, 375)    | 15.821              | <0.001 |
| <b>Total MVPA<sup>3</sup></b>        |                |                |                  |                     |        |
| Volume, min/week                     | 230 (110, 440) | 270 (125, 500) | 286.5 (120, 570) | 41.574              | <0.001 |
|                                      | <i>n (%)</i>   | <i>n (%)</i>   | <i>n (%)</i>     |                     |        |
| <b>Study year</b>                    |                |                |                  | 147.006             | <0.001 |
| Year 1                               | 698 (32.9)     | 453 (35.8)     | 345 (25.2)       |                     |        |
| Year 2                               | 691 (32.5)     | 443 (35.0)     | 328 (24.0)       |                     |        |
| Year 3                               | 734 (34.6)     | 371 (29.3)     | 695 (50.8)       |                     |        |
| <b>University sports team member</b> |                |                |                  | 99.654              | <0.001 |
| No                                   | 1977 (93.1)    | 1153 (91.0)    | 1132 (82.7)      |                     |        |
| Yes                                  | 146 (6.9)      | 114 (9.0)      | 236 (17.3)       |                     |        |
| <b>Other sports team member</b>      |                |                |                  | 0.732               | 0.694  |
| No                                   | 1989 (93.7)    | 1196 (94.4)    | 1287 (94.1)      |                     |        |
| Yes                                  | 134 (6.3)      | 71 (5.6)       | 81 (5.9)         |                     |        |



| <b>Sleep duration</b> |            |            |            | 338.655 | <0.001 |
|-----------------------|------------|------------|------------|---------|--------|
| 7.00-7.99 h/d         | 69 (3.3)   | 29 (2.3)   | 189 (13.8) |         |        |
| <6.00 h/d             | 406 (19.1) | 187 (14.8) | 376 (27.5) |         |        |
| 6.00-6.99 h/d         | 841 (39.6) | 608 (48.0) | 433 (31.7) |         |        |
| 8.00-8.99 h/d         | 563 (26.5) | 353 (27.9) | 270 (19.7) |         |        |
| ≥ 9.00 h/d            | 244 (11.5) | 90 (7.1)   | 100 (7.3)  |         |        |

<sup>1</sup>: VPA, vigorous-intensity physical activity.

<sup>2</sup>: MPA, moderate-intensity physical activity.

<sup>3</sup>: MVPA, moderate- and vigorous-intensity physical activity.

<sup>a</sup>: *F*-value, tested by one-way ANOVA.

<sup>b</sup>: The between-group differences of study year, university/other sports team member, and sleep duration were tested by Pearson chi-square tests, and 20 PA-related variables were tested by Kruskal-Wallis H tests.

**STROBE 2007 (v4) Statement—Checklist of items that should be included in reports of *cross-sectional studies***

| Section/Topic                | Item # | Recommendation                                                                                                                                                                       | Reported on page # |
|------------------------------|--------|--------------------------------------------------------------------------------------------------------------------------------------------------------------------------------------|--------------------|
| <b>Title and abstract</b>    | 1      | (a) Indicate the study's design with a commonly used term in the title or the abstract                                                                                               | 2                  |
|                              |        | (b) Provide in the abstract an informative and balanced summary of what was done and what was found                                                                                  | 2-3                |
| <b>Introduction</b>          |        |                                                                                                                                                                                      |                    |
| Background/rationale         | 2      | Explain the scientific background and rationale for the investigation being reported                                                                                                 | 4-6                |
| Objectives                   | 3      | State specific objectives, including any prespecified hypotheses                                                                                                                     | 6                  |
| <b>Methods</b>               |        |                                                                                                                                                                                      |                    |
| Study design                 | 4      | Present key elements of study design early in the paper                                                                                                                              | 7                  |
| Setting                      | 5      | Describe the setting, locations, and relevant dates, including periods of recruitment, exposure, follow-up, and data collection                                                      | 7-9                |
| Participants                 | 6      | (a) Give the eligibility criteria, and the sources and methods of selection of participants                                                                                          | 7                  |
| Variables                    | 7      | Clearly define all outcomes, exposures, predictors, potential confounders, and effect modifiers. Give diagnostic criteria, if applicable                                             | 7-9                |
| Data sources/<br>measurement | 8*     | For each variable of interest, give sources of data and details of methods of assessment (measurement). Describe comparability of assessment methods if there is more than one group | 7-9                |
| Bias                         | 9      | Describe any efforts to address potential sources of bias                                                                                                                            | None               |
| Study size                   | 10     | Explain how the study size was arrived at                                                                                                                                            | 7                  |
| Quantitative variables       | 11     | Explain how quantitative variables were handled in the analyses. If applicable, describe which groupings were chosen and why                                                         | 9                  |
| Statistical methods          | 12     | (a) Describe all statistical methods, including those used to control for confounding                                                                                                | 10                 |
|                              |        | (b) Describe any methods used to examine subgroups and interactions                                                                                                                  | 10                 |
|                              |        | (c) Explain how missing data were addressed                                                                                                                                          | None               |
|                              |        | (d) If applicable, describe analytical methods taking account of sampling strategy                                                                                                   | None               |
|                              |        | (e) Describe any sensitivity analyses                                                                                                                                                | None               |
| <b>Results</b>               |        |                                                                                                                                                                                      |                    |

|                          |     |                                                                                                                                                                                                              |                      |
|--------------------------|-----|--------------------------------------------------------------------------------------------------------------------------------------------------------------------------------------------------------------|----------------------|
| Participants             | 13* | (a) Report numbers of individuals at each stage of study—eg numbers potentially eligible, examined for eligibility, confirmed eligible, included in the study, completing follow-up, and analysed            | 7                    |
|                          |     | (b) Give reasons for non-participation at each stage                                                                                                                                                         | None                 |
|                          |     | (c) Consider use of a flow diagram                                                                                                                                                                           | None                 |
| Descriptive data         | 14* | (a) Give characteristics of study participants (eg demographic, clinical, social) and information on exposures and potential confounders                                                                     | 11 & 12              |
|                          |     | (b) Indicate number of participants with missing data for each variable of interest                                                                                                                          | None                 |
| Outcome data             | 15* | Report numbers of outcome events or summary measures                                                                                                                                                         | 11, 16 & 17          |
| Main results             | 16  | (a) Give unadjusted estimates and, if applicable, confounder-adjusted estimates and their precision (eg, 95% confidence interval). Make clear which confounders were adjusted for and why they were included | 11-16                |
|                          |     | (b) Report category boundaries when continuous variables were categorized                                                                                                                                    | 13-15                |
|                          |     | (c) If relevant, consider translating estimates of relative risk into absolute risk for a meaningful time period                                                                                             | None                 |
| Other analyses           | 17  | Report other analyses done—eg analyses of subgroups and interactions, and sensitivity analyses                                                                                                               | 16 & 17              |
| <b>Discussion</b>        |     |                                                                                                                                                                                                              |                      |
| Key results              | 18  | Summarise key results with reference to study objectives                                                                                                                                                     | 17 & 18              |
| Limitations              | 19  | Discuss limitations of the study, taking into account sources of potential bias or imprecision. Discuss both direction and magnitude of any potential bias                                                   | 3 & 4 & 19 & 21 & 22 |
| Interpretation           | 20  | Give a cautious overall interpretation of results considering objectives, limitations, multiplicity of analyses, results from similar studies, and other relevant evidence                                   | 23                   |
| Generalisability         | 21  | Discuss the generalisability (external validity) of the study results                                                                                                                                        | None                 |
| <b>Other information</b> |     |                                                                                                                                                                                                              |                      |
| Funding                  | 22  | Give the source of funding and the role of the funders for the present study and, if applicable, for the original study on which the present article is based                                                | 4                    |

\*Give information separately for cases and controls in case-control studies and, if applicable, for exposed and unexposed groups in cohort and cross-sectional studies.

**Note:** An Explanation and Elaboration article discusses each checklist item and gives methodological background and published examples of transparent reporting. The STROBE checklist is best used in conjunction with this article (freely available on the Web sites of PLoS Medicine at <http://www.plosmedicine.org/>, Annals of Internal Medicine at <http://www.annals.org/>, and Epidemiology at <http://www.epidem.com/>). Information on the STROBE Initiative is available at [www.strobe-statement.org](http://www.strobe-statement.org).
